# Supplementary material for: Thioether-based anchimeric assistance for asymmetric coordination chemistry with ruthenium(ii) and osmium(ii)
Source: Royal Society of Chemistry journal article supplement (doi:10.1039/c3dt00015j), 2013-01-01
Supplement: c3dt00015j.pdf [file c3dt00015j.pdf]

# ELECTRONIC SUPPORTING INFORMATION

## Thioether-Based Anchimeric Assistance for Asymmetric Coordination Chemistry with Ruthenium(II) and Osmium(II)

*Liang-An Chen, Xiaobing Ding, Lei Gong and Eric Meggers*

### **Contents:**

1. Materials and Methods
2. Synthesis of Chiral Ligands
3. Diastereoselective Synthesis of Ruthenium and Osmium Complexes
4. TFA-Induced Removal of Chiral Auxiliaries
5. CD Spectra of Ruthenium and Osmium Complexes
6. Chiral HPLC Chromatography for Determination of Enantiomeric Ratios
7. Single Crystal X-Ray Diffraction of Complexes  $\Delta$ -**3g** and  $\Delta$ -**5**
8. References

## 1. Materials and Methods

All reactions were carried out under an atmosphere of argon and coordination chemistry was performed in the dark. Solvents were distilled under argon from calcium hydride (CH<sub>3</sub>CN, DMF, CH<sub>2</sub>Cl<sub>2</sub>) or sodium/benzophenone (Et<sub>2</sub>O, toluene). Absolute ethanol was used without further drying. [(η<sup>6</sup>-C<sub>6</sub>H<sub>6</sub>)Ru(bpy)Cl]Cl (**1**),<sup>[1]</sup> [(η<sup>6</sup>-C<sub>6</sub>H<sub>6</sub>)Os(bpy)Cl]Cl (**4**)<sup>[2]</sup> and chiral amino alcohols<sup>[3,4]</sup> were prepared according to published procedures. All other reagents were purchased from Acros, Aldrich or Alfa and used without further purification. Column chromatography was performed with silica gel (300-400 mesh). <sup>1</sup>H- and <sup>13</sup>C-NMR spectra were recorded on a Bruker Avance (300 MHz), a Bruker AM (400 MHz) or a Bruker AM (500 MHz) spectrometer at ambient temperature. NMR standards used are as follows: (<sup>1</sup>H-NMR) CD<sub>3</sub>CN = 1.94 ppm, CDCl<sub>3</sub> = 7.26 ppm. (<sup>13</sup>C-NMR) CD<sub>3</sub>CN = 1.32 ppm, CDCl<sub>3</sub> = 77.00 ppm. <sup>1</sup>H NMR data are reported as follows: chemical shift in ppm downfield from tetramethylsilane (δ scale), multiplicity (s = singlet, d = doublet, t = triplet, q = quartet, m = multiplet, and br = broad), coupling constant (Hz), and integration. <sup>13</sup>C NMR chemical shifts are reported in ppm downfield from tetramethylsilane (δ scale). IR spectra were recorded on a Nicolet Avatar 330 RT-IR spectrophotometer. Chiral HPLC chromatograms were obtained from an Agilent 1260 Series HPLC system. CD spectra were recorded on a JASCO J-810 CD spectropolarimeter (200-600 nm, band width of 1 nm, scanning speed of 50 nm/min, accumulation of 3 scans). High-resolution mass spectra were recorded on a Bruker Apex Ultra FTMS 7.0 T instrument using ESI technique.

## 2. Synthesis of Chiral Ligands

### 2.1. Synthesis of amino alcohols

The amino alcohol (*R*)-2-amino-1,1-diphenyl-3-methylthio-1-propanol was synthesized according to published procedures.<sup>[3]</sup> The remaining amino alcohols were synthesized according to the following procedure:<sup>[4]</sup> A solution of amino acid methyl ester or its hydrochloride (1 eq) in dry diethyl ether (0.4 M) was added dropwise to a stirred solution of freshly prepared methyl magnesium iodide (4 or 6 eq). The reaction mixture was refluxed for 1-2 hours and then quenched with aqueous ammonium chloride. The organic layer was separated and the aqueous phase was extracted three times with diethyl ether. The combined organic phase was dried over anhydrous sodium sulfate, then dried under high vacuum and the obtained products were used directly for the next step without further purification.

### 2.2. Synthesis of 2-(2'-hydroxyphenyl)oxazoline derivatives

The oxazolines (*S*)-4-isopropyl-2-(2'-hydroxyphenyl)-2-oxazoline (**2a**), (*R*)-4-(methylthiomethyl)-2-(2'-hydroxyphenyl)-2-oxazoline (**2b**), (*R*)-5,5-dimethyl-4-(methylthiomethyl)-2-(2'-hydroxyphenyl)-2-oxazoline (**2d**), and (*S*)-4-(methylthioethyl)-2-(2'-hydroxyphenyl)-2-oxazoline (**2h**) were synthesized following published procedures.<sup>[4,5]</sup> The derivatives (*R*)-5,5-diphenyl-4-(methylthiomethyl)-2-(2'-hydroxyphenyl)-2-oxazoline (**2c**), (*R*)-5,5-dimethyl-4-(isopropylthiomethyl)-2-(2'-hydroxyphenyl)-2-oxazoline (**2e**), (*R*)-5,5-dimethyl-4-(*tert*-butylthiomethyl)-2-(2'-hydroxyphenyl)-2-oxazoline (**2f**), and the auxiliary (*R*)-5-(benzylthiomethyl)-4,4-dimethyl-2-(2'-hydroxyphenyl)-2-oxazoline (**2g**) were synthesized with modifications of a published procedure<sup>[4]</sup> as follows: Amino alcohol (1.0 eq),

2-hydroxybenzotrile (1.2 eq), and zinc chloride (0.020 eq) were dissolved in toluene (1.0 M) under argon. The mixture was heated at reflux for 24 h and afterwards dried under vacuum to give an oily residue which was redissolved in dichloromethane and washed with water. The organic phase was separated and dried over anhydrous sodium sulfate. After filtration and evaporation, the crude product was purified by silica gel column chromatography.

**(R)-5,5-Diphenyl-4-(methylthiomethyl)-2-(2'-hydroxyphenyl)-2-oxazoline (2c)**

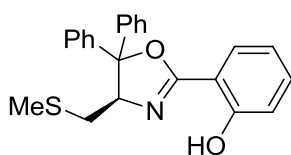

Synthesized from (*R*)-2-amino-1,1-diphenyl-3-methylthio-1-propanol as described above.<sup>[3]</sup> The crude material was purified by silica gel column chromatography (elution with hexanes/EtOAc = 20:1) to give the pure product as a white solid. Yield: 51%.

<sup>1</sup>H-NMR (300.1 MHz, CDCl<sub>3</sub>):  $\delta$  (ppm) 11.90 (br, 1H), 7.83 (dd,  $J = 7.8, 1.5$  Hz, 1H), 7.52 (m, 2H), 7.25 (m, 9H), 6.96 (dd,  $J = 8.4, 0.6$  Hz, 1H), 6.86 (td,  $J = 7.2, 1.2$  Hz, 1H), 5.06 (dd,  $J = 8.4, 5.7$  Hz, 1H), 2.30 (m, 2H), 2.05 (s, 3H).

<sup>13</sup>C-NMR (75.5 MHz, CDCl<sub>3</sub>):  $\delta$  (ppm) 164.2, 160.2, 143.0, 139.3, 136.5, 133.8, 129.0, 128.6, 128.4, 128.3, 128.2, 128.0, 126.8, 126.5, 120.1, 119.0, 118.8, 117.0, 110.5, 92.5, 74.5, 38.2, 16.8.

IR (neat):  $\nu$  (cm<sup>-1</sup>) 3059, 2921, 2798, 2642, 1646, 1620, 1582, 1535, 1489, 1448, 1427, 1412, 1357, 1310, 1285, 1258, 1237, 1189, 1156, 1137, 1102, 1079, 1035, 999, 969, 936, 924, 897, 829, 791, 752, 700, 630, 529.

HRMS calcd for C<sub>23</sub>H<sub>21</sub>SO<sub>2</sub>NNa (M+Na)<sup>+</sup> 398.1185, found: 398.1185.

**(R)-5,5-Dimethyl-4-(isopropylthiomethyl)-2-(2'-hydroxyphenyl)-2-oxazoline (2e)**

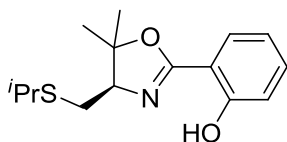

Synthesized from (*R*)-2-amino-1,1-dimethyl-3-isopropylthio-1-propanol as described above. The crude material was purified by column chromatography (elution with hexanes/EtOAc = 50: 1) to give the pure product as a brownish yellow oil. Yield: 68%.

<sup>1</sup>H-NMR (400.1 MHz, CDCl<sub>3</sub>) δ (ppm) 12.21 (br, 1H), 7.61 (dd, *J* = 7.8, 1.7 Hz, 1H), 7.35 (m, 1H), 6.99 (dd, *J* = 8.3, 0.8 Hz, 1H), 6.84 (m, 1H), 4.06 (dd, *J* = 8.5, 6.0 Hz, 1H), 3.04 (hept, *J* = 6.7 Hz, 1H), 2.90 (dd, *J* = 13.1, 6.0 Hz, 1H), 2.68 (dd, *J* = 13.1, 8.5 Hz, 1H), 1.58 (s, 3H), 1.44 (s, 3H), 1.32 (d, *J* = 1.6 Hz, 3H), 1.30 (d, *J* = 1.6 Hz, 3H).

<sup>13</sup>C-NMR (100.6 MHz, CDCl<sub>3</sub>) δ (ppm) 164.4, 160.1, 133.3, 128.1, 118.5, 116.8, 110.9, 86.2, 73.3, 35.9, 31.6, 29.70, 28.8, 23.5, 21.5.

IR (film): ν (cm<sup>-1</sup>) 3064, 2961, 2926, 2866, 1638, 1616, 1490, 1457, 1419, 1386, 1364, 1342, 1312, 1261, 1237, 1153, 1124, 1068, 1034, 967, 848, 799, 756, 686.

HRMS calcd for C<sub>15</sub>H<sub>22</sub>NO<sub>2</sub>S (M+H)<sup>+</sup> 280.1366, found: 280.1369.

**(R)-5,5-Dimethyl-4-(tert-butylthiomethyl)-2-(2'-hydroxyphenyl)-2-oxazoline (2f)**

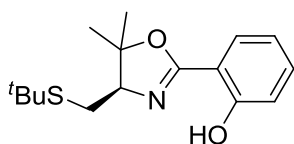

Synthesized from (*R*)-2-amino-1,1-dimethyl-3-*tert*-butylthio-1-propanol as described above. The crude product was purified by column chromatography (elution with hexanes/EtOAc = 30: 1) to give the pure product as a brownish yellow oil. Yield: 76%.

$^1\text{H-NMR}$  (400.1 MHz,  $\text{CDCl}_3$ )  $\delta$  (ppm) 12.22 (br, 1H), 7.61 (dd,  $J = 7.8, 1.7$  Hz, 1H), 7.35 (m, 1H), 6.99 (dd,  $J = 8.3, 0.8$  Hz, 1H), 6.85 (td,  $J = 7.8, 1.0$  Hz, 1H), 4.03 (dd,  $J = 9.5, 5.3$  Hz, 1H), 2.92 (dd,  $J = 12.4, 5.3$  Hz, 1H), 2.69 (dd,  $J = 12.4, 9.5$  Hz, 1H), 1.57 (s, 3H), 1.45 (s, 3H), 1.36 (s, 9H).

$^{13}\text{C-NMR}$  (100.1MHz,  $\text{CDCl}_3$ )  $\delta$  (ppm) 164.3, 160.1, 133.3, 128.1, 118.5, 116.8, 110.9, 86.3, 73.2, 42.7, 30.8, 29.4, 28.8, 21.5.

IR (film):  $\nu$  ( $\text{cm}^{-1}$ ) 3061, 2959, 2923, 2849, 1641, 1615, 1582, 1536, 1491, 1460, 1386, 1364, 1342, 1312, 1261, 1237, 1153, 1123, 1068, 1034, 961, 848, 799, 755, 686.

HRMS calcd for  $\text{C}_{16}\text{H}_{24}\text{NO}_2\text{S}$  ( $\text{M}+\text{H}$ ) $^+$  294.1522, found: 294.1526.

**(R)-4-(Benzylthiomethyl)-5,5-dimethyl-2-(2'-hydroxyphenyl)-2-oxazoline (2g)**

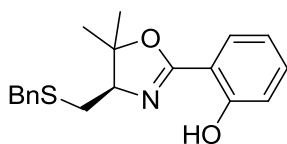

Synthesized from (*R*)-2-amino-1,1-dimethyl-3-benzylthio-1-propanol as described above. The crude product was purified by silica gel column chromatography (elution with hexanes/EtOAc = 50: 1) to give the pure product as a pale yellow oil. Yield: 71%.

$^1\text{H-NMR}$  (400.1 MHz,  $\text{CDCl}_3$ ):  $\delta$  (ppm) 12.21 (br, 1H), 7.59 (dt,  $J = 10.6, 5.3$  Hz, 1H), 7.33 (m, 5H), 7.24 (m, 1H), 6.98 (d,  $J = 8.3$  Hz, 1H), 6.84 (t,  $J = 7.5$  Hz, 1H), 3.97 (dd,  $J = 7.9, 6.5$  Hz, 1H), 3.81 (s, 2H), 2.76 (dd,  $J = 13.3, 6.3$  Hz, 1H), 2.58 (dd,  $J = 13.3, 8.1$  Hz, 1H), 1.50 (s, 3H), 1.35 (s, 3H).

$^{13}\text{C-NMR}$  (100.6 MHz,  $\text{CDCl}_3$ ):  $\delta$  (ppm) 164.6, 160.2, 138.2, 133.5, 129.1, 128.7, 128.2, 127.3, 118.6, 116.9, 111.0, 86.2, 72.7, 37.4, 32.5, 28.8, 21.6.

IR (film):  $\nu$  (cm<sup>-1</sup>) 3061, 3027, 2974, 2921, 1637, 1615, 1582, 1492, 1453, 1422, 1386, 1364, 1343,  
1312, 1260, 1238, 1153, 1124, 1069, 1033, 805, 756, 701.

HRMS calcd for C<sub>19</sub>H<sub>22</sub>NO<sub>2</sub>S (M+H)<sup>+</sup> 328.1366, found: 328.1370.

### 3. Diastereoselective Synthesis of Ruthenium and Osmium Complexes

*General method for the diastereoselective synthesis of ruthenium complexes according to Table 1:* A mixture of  $[(\eta^6\text{-C}_6\text{H}_6)\text{Ru}(\text{bpy})\text{Cl}]\text{Cl}$  (**1**)<sup>[1]</sup> (15.0 mg, 0.037 mmol, 1.0 eq), chiral oxazoline (1.1 eq), 2,2'-bipyridine (6.9 mg, 0.044 mmol, 1.2 eq), and triethylamine (53.4  $\mu\text{L}$ , 0.37 mmol, 10 eq) in ethanol (15 mL, 2.5 mM) was heated at reflux under argon overnight in the dark. The solvent was then removed under reduced pressure and the residue was purified by silica gel column chromatography ( $\text{CH}_3\text{CN}:\text{H}_2\text{O}:\text{KNO}_3(\text{sat}) = 100:3:1$ ). The eluents were concentrated to dryness and the resulting material dissolved in minimal amounts of ethanol/water. The product was precipitated by the addition of excess solid  $\text{NH}_4\text{PF}_6$ . The precipitate was centrifuged, washed twice with water, and dried under high vacuum to afford a brownish or purple solid.

#### *Ruthenium complex A-3a*<sup>[5]</sup>

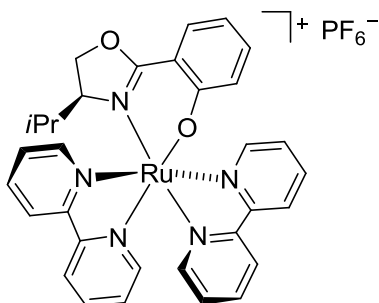

Synthesized with the chiral oxazoline **2a** (13.4 mg, 0.041 mmol). The crude material was purified by silica gel column chromatography ( $\text{CH}_3\text{CN}:\text{H}_2\text{O}:\text{KNO}_3(\text{sat}) = 100:3:1$ ) to give a brownish purple product with a diastereomeric ratio of  $\Delta:\Lambda = 1:2$  which was determined by  $^1\text{H-NMR}$ . Yield: 7.6 mg (27%). The metal-centered configuration was assigned by CD spectroscopy (Figure S1).<sup>[5]</sup>

CD (MeCN):  $\lambda$ , nm ( $\Delta\epsilon$ ,  $\text{M}^{-1}\text{cm}^{-1}$ ) 285 (-18), 299 nm (+56).



### Ruthenium complex **A-3b**<sup>[6]</sup>

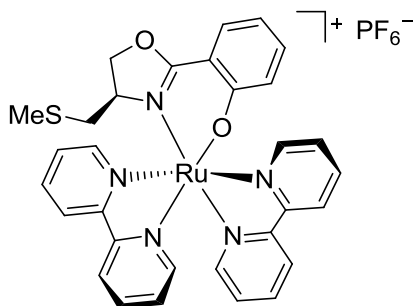

Synthesized with the chiral oxazoline **2b** (10.3 mg, 0.041 mmol). The crude material was purified by silica gel column chromatography (CH<sub>3</sub>CN: H<sub>2</sub>O: KNO<sub>3</sub>(sat) = 100: 3: 1) to give a brownish purple product with a diastereomeric ratio of Δ:Λ = 11:1 which was determined by <sup>1</sup>H-NMR. Yield: 19.5 mg (61%). The metal-centered configuration was assigned by CD spectroscopy (Figure S2).<sup>[6]</sup>

CD (MeCN): λ, nm (Δε, M<sup>-1</sup>cm<sup>-1</sup>) 299 (-101), 364 (+12).

### Ruthenium complex **A-3c**

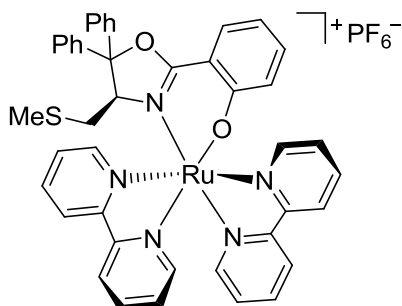

Synthesized with the chiral oxazoline **2c** (15.4 mg, 0.041mmol). The crude material was purified by silica gel column chromatography (CH<sub>3</sub>CN: H<sub>2</sub>O: KNO<sub>3</sub> (sat) = 150: 3: 1) to give a brownish purple product with a diastereomeric ratio of 19:1 which was determined by <sup>1</sup>H NMR. Yield: 21.3 mg, 59%. The metal-centered configuration was assigned by CD spectroscopy (Figure S3).

<sup>1</sup>H-NMR (500.1 MHz, CD<sub>3</sub>CN) for the major diastereomer: δ (ppm) 9.25 (d, *J* = 5.5 Hz, 1H), 8.46 (dd, *J* = 8.0 Hz, 1H), 8.42 (dd, *J* = 8.0 Hz, 2H), 8.36 (d, *J* = 8.0 Hz, 1H), 8.26 (d, *J* = 5.5, 1H), 8.02

(td,  $J = 7.9, 1.3$  Hz, 1H), 7.99 (m, 2H), 7.87 (td,  $J = 7.9, 1.3$  Hz, 1H), 7.82 (m, 2H), 7.54 (ddd,  $J = 7.1, 5.7, 1.1$  Hz, 1H), 7.48 (m, 2H), 7.44 (d,  $J = 5.6$  Hz, 1H), 7.29 (m, 4H), 7.18 (t,  $J = 8.0$  Hz, 1H), 7.08 (m, 6H), 6.50 (t,  $J = 7.5$  Hz, 1H), 5.32 (d,  $J = 8.6$  Hz, 1H), 3.63 (dd,  $J = 8.6, 2.7$  Hz, 1H), 2.64 (m, 2H), 1.34 (s, 3H).

$^{13}\text{C}$ -NMR (125.8 MHz,  $\text{CD}_3\text{CN}$ ) for the major diastereomer:  $\delta$  (ppm) 170.2, 161.9, 159.4, 158.2, 157.9, 157.1, 154.1, 152.8, 151.3, 149.8, 142.8, 138.9, 136.4, 136.0, 135.8, 134.9, 133.0, 129.6, 129.4, 128.7, 128.03, 127.99, 127.8, 127.3, 126.5, 126.4, 125.73, 125.70, 125.4, 113.3, 110.3, 91.7, 73.3, 35.8, 15.3.

IR (neat):  $\nu$  ( $\text{cm}^{-1}$ ) 3060, 2962, 2922, 1611, 1536, 1493, 1467, 1443, 1420, 1378, 1350, 1260, 1240, 1191, 1157, 1078, 1019, 928, 875, 837, 799, 758, 730, 701, 658, 592, 557. HRMS calcd for  $\text{C}_{43}\text{H}_{36}\text{RuSO}_2\text{N}_5$  ( $\text{M-PF}_6$ ) $^+$  788.1639, found: 788.1639.

CD (MeCN):  $\lambda$ , nm ( $\Delta\epsilon$ ,  $\text{M}^{-1}\text{cm}^{-1}$ ) 300 (-76), 285 (+21)

### *Ruthenium complex **Δ-3d***<sup>[6]</sup>

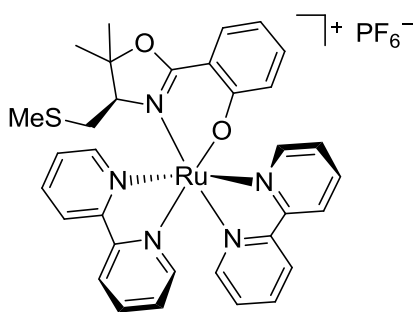

Synthesized with the chiral oxazoline **2d** was used (8.4 mg, 0.041 mmol). The crude material was purified by silica gel column chromatography ( $\text{CH}_3\text{CN} : \text{H}_2\text{O} : \text{KNO}_3(\text{sat}) = 100 : 3 : 1$ ) to give a brownish purple product with a diastereomeric ratio of 22:1 which was determined by  $^1\text{H}$ -NMR. Yield: 22.1 mg (74%). The metal-centered configuration was assigned by CD spectroscopy (Figure

S4).<sup>[6]</sup> CD (MeCN):  $\lambda$ , nm ( $\Delta\epsilon$ ,  $M^{-1}cm^{-1}$ ) 298 (-85), 364 (+17).

### Ruthenium complex **Δ-3e**

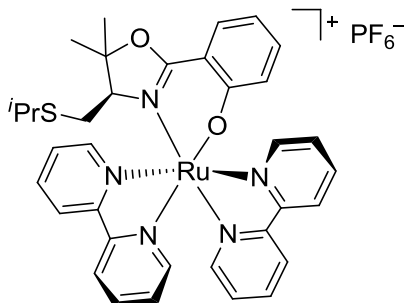

Synthesized with the chiral oxazoline **2e** (11.5 mg, 0.041 mmol). The crude material was purified by silica gel column chromatography ( $CH_3CN$ :  $H_2O$ :  $KNO_3$ (sat) = 100: 3: 1) to give a brownish purple product with a diastereomeric ratio of 16:1 as determined by  $^1H$ -NMR. Yield: 23.1 mg (71%). The relative metal-centered configuration was assigned by CD spectroscopy (Figure S5) .

$^1H$ -NMR (400.1 MHz,  $CD_3CN$ ) for the major diastereomer:  $\delta$  (ppm) 9.07 (d,  $J = 5.6$ , 1H), 8.82 (d,  $J = 5.6$ , 1H), 8.48 (d,  $J = 8.1$  Hz, 1H), 8.44 (d,  $J = 8.0$  Hz, 1H), 8.36 (d,  $J = 8.1$  Hz, 2H), 8.08 (ddd,  $J = 9.3$ , 5.8, 1.5 Hz, 1H), 7.97 (td,  $J = 7.9$  Hz, 1.4 Hz, 1H), 7.93 (d,  $J = 5.7$ , 1H), 7.83 (td,  $J = 8.0$  Hz, 1.4 Hz, 1H), 7.77 (td,  $J = 8.0$  Hz, 1.4 Hz, 1H), 7.63 (m, 2H), 7.49 (dd,  $J = 8.1$ , 1.8 Hz, 1H), 7.43 (m, 1H), 7.11 (m, 2H), 6.98 (ddd,  $J = 8.7$ , 6.9, 1.9 Hz, 1H), 6.33 (m, 2H), 2.73 (dd,  $J = 12.1$ , 10.5 Hz, 1H), 2.43 (m, 3H), 1.52 (s, 3H), 1.08 (d,  $J = 6.7$  Hz, 3H), 1.01 (d,  $J = 6.7$  Hz, 3H), 0.59 (s, 3H).

$^{13}C$ -NMR (100.6 MHz,  $CD_3CN$ ) for the major diastereomer:  $\delta$  (ppm) 171.1, 162.9, 160.4, 159.2, 158.9, 158.9, 154.8, 153.6, 152.5, 151.6, 137.1, 136.9, 136.7, 135.6, 133.6, 130.5, 127.8, 127.4, 126.7, 126.4, 124.9, 124.3, 124.2, 124.1, 123.9, 113.9, 111.6, 86.1, 73.2, 37.6, 32.3, 28.2, 23.9, 23.6, 21.4.

IR (film):  $\nu$  ( $cm^{-1}$ ) 3367, 2963, 2923, 2845, 1611, 1534, 1450, 1384, 1259, 1195, 1155, 1086, 1052,

869, 845, 799, 747, 607, 543.

HRMS calcd for  $C_{35}H_{36}N_5O_2RuS$  ( $M-PF_6$ )<sup>+</sup> 692.1633, found: 692.1616.

CD (MeCN):  $\lambda$ , nm ( $\Delta\epsilon$ ,  $M^{-1}cm^{-1}$ ) 301 (-56), 366 (+11).

### Ruthenium complex **Δ-3f**

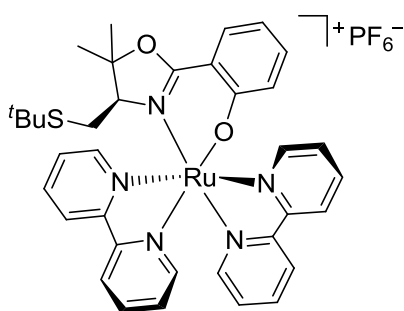

Synthesized with the chiral oxazoline **2f** (12.0 mg, 0.041 mmol). The crude material was purified by silica gel column chromatography ( $CH_3CN:H_2O:KNO_3(sat) = 100:3:1$ ) to give a brownish purple product with a diastereomeric ratio of 8:1 as determined by  $^1H$ -NMR. Yield: 25.5 mg, 67%. The metal-centered configuration was assigned by CD spectroscopy (Figure S6).

$^1H$ -NMR (400.1 MHz,  $CD_3CN$ ) for the major diastereomer:  $\delta$  (ppm) 9.12 (d,  $J = 5.6$ , 1H), 8.85 (d,  $J = 5.7$  Hz, 1H), 8.48 (m, 2H), 8.38 (m, 2H), 8.09 (td,  $J = 7.7, 1.5$  Hz, 1H), 7.98 (td,  $J = 7.9, 1.5$  Hz, 1H), 7.87 (d,  $J = 5.7$  Hz, 1H), 7.83 (td,  $J = 7.8, 1.5$  Hz, 1H), 7.76 (td,  $J = 7.9, 1.5$  Hz, 1H), 7.62 (m, 2H), 7.52 (dd,  $J = 8.1, 1.8$  Hz, 1H), 7.46 (m, 1H), 7.12 (m, 2H), 7.01 (ddd,  $J = 8.7, 6.9, 1.9$  Hz, 1H), 6.35 (m, 2H), 2.73 (t,  $J = 10.8$  Hz, 1H), 2.55 (dd,  $J = 11.0, 1.6$  Hz, 1H), 2.38 (dd,  $J = 10.5, 1.6$  Hz, 1H), 1.59 (s, 3H), 1.16 (s, 9H), 0.61 (s, 3H).

$^{13}C$ -NMR (100.1 MHz,  $CD_3CN$ ) for the major diastereomer:  $\delta$  (ppm) 171.0, 162.8, 160.2, 159.1, 159.0, 158.9, 154.7, 153.6, 152.6, 151.6, 137.0, 136.9, 136.7, 135.6, 133.6, 130.5, 127.8, 127.6,

126.7, 126.4, 124.8, 124.4, 124.3, 124.1, 123.9, 113.8, 111.5, 86.3, 71.9, 42.9, 30.8, 29.4, 28.3, 21.3.

IR (film):  $\nu$  ( $\text{cm}^{-1}$ ) 3385, 2960, 2924, 2851, 1661, 1650, 1609, 1534, 1468, 1442, 1412, 1384, 1342, 1246, 1153, 1069, 1043, 872, 766, 729, 656, 650, 543.

HRMS calcd for  $\text{C}_{36}\text{H}_{38}\text{N}_5\text{O}_2\text{RuS}$  ( $\text{M-PF}_6$ )<sup>+</sup>, 706.1790, found: 706.1798.

CD (MeCN):  $\lambda$ , nm ( $\Delta\epsilon$ ,  $\text{M}^{-1}\text{cm}^{-1}$ ) 301 (-37), 359 (+9).

### *Ruthenium complex $\Delta$ -3g*

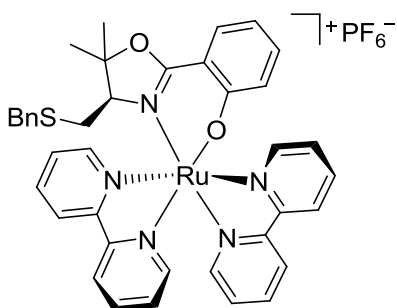

Synthesized with the chiral oxazoline **2g** (13.4 mg, 0.041 mmol). The crude material was purified by silica gel column chromatography ( $\text{CH}_3\text{CN}:\text{H}_2\text{O}:\text{KNO}_3(\text{sat}) = 150:3:1$ ) to give a brownish purple product with a diastereomeric ratio of 24:1 as determined by  $^1\text{H-NMR}$ . Yield: 26.8 mg (82%). The product purity could be further improved by precipitation from  $\text{CH}_2\text{Cl}_2/\text{Et}_2\text{O}$ . For this,  $\Delta$ -**3g** was first dissolved in  $\text{CH}_2\text{Cl}_2$  (2 mL), then  $\text{Et}_2\text{O}$  (6 mL) was added slowly under stirring, and the formed precipitation was centrifuged and dried under high vacuum to give the product with d.r. > 100:1. Yield: 23.1 mg (86%). The metal-centered configuration was assigned by CD spectroscopy (Figure S7) and confirmed by X-ray crystallography (Figure S18).

$^1\text{H-NMR}$  (400.1 MHz,  $\text{CD}_3\text{CN}$ ) for the major diastereomer:  $\delta$  (ppm) 8.95 (d,  $J = 5.2$  Hz, 1H), 8.78 (d,  $J = 5.2$ , 1H), 8.45 (dd,  $J = 11.6$ , 8.2 Hz, 2H), 8.33 (t,  $J = 7.6$  Hz, 2H), 8.06 (td,  $J = 8.0$ , 1.5 Hz, 1H), 8.01 (td,  $J = 8.0$ , 1.4 Hz, 1H), 7.80 (td,  $J = 8.0$ , 1.4 Hz, 1H), 7.71 (td,  $J = 8.0$ , 1.3 Hz, 1H), 7.59 (m, 2H), 7.48 (ddd,  $J = 8.7$ , 6.5, 1.5 Hz, 3H), 7.21 (m, 3H), 7.11 (m, 3H), 6.98 (ddd,  $J = 8.7$ , 6.9, 1.9 Hz, 1H), 6.87 (ddd,  $J = 7.2$ , 5.7, 1.2 Hz, 1H), 6.35 (m, 2H), 3.40 (m, 2H), 2.65 (dd,  $J = 11.9$ , 10.9 Hz, 1H), 2.42 (m, 2H), 1.49 (s, 3H), 0.56 (s, 3H).

$^{13}\text{C-NMR}$  (100.6 MHz,  $\text{CD}_3\text{CN}$ ) for the major diastereomer:  $\delta$  (ppm) 171.1, 162.99, 160.3, 159.1, 159.0, 158.9, 154.4, 153.6, 152.5, 151.6, 139.1, 137.1, 136.9, 136.7, 135.5, 133.7, 130.6, 129.9, 129.5, 128.1, 127.8, 127.6, 126.8, 124.9, 124.4, 124.2, 123.9, 113.9, 111.4, 86.2, 72.6, 37.7, 33.5, 28.0, 21.4.

IR (film):  $\nu$  ( $\text{cm}^{-1}$ ) 3397, 2921, 2848, 1667, 1609, 1536, 1469, 1442, 1418, 1390, 1349, 1247, 1155, 1069, 1019, 873, 839, 763, 730, 706, 558.

HRMS calcd for  $\text{C}_{39}\text{H}_{36}\text{N}_5\text{O}_2\text{RuS}$  ( $\text{M-PF}_6$ ) $^+$  740.1633, found: 740.1628.

CD (MeCN):  $\lambda$ , nm ( $\Delta\epsilon$ ,  $\text{M}^{-1}\text{cm}^{-1}$ ) 301 (-103), 285(+21).

### ***Ruthenium complex A-3h***

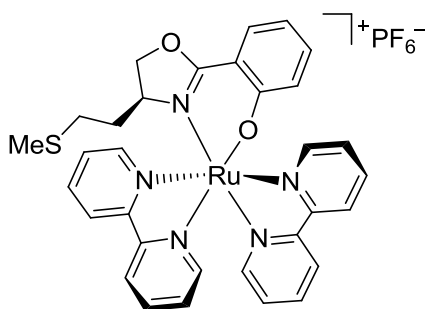

Synthesized with the chiral oxazoline **2h** (9.7 mg, 0.041 mmol). The crude material was purified by

silica gel column chromatography (CH<sub>3</sub>CN: H<sub>2</sub>O: KNO<sub>3</sub>(sat) = 100: 3: 1) to give a brownish purple product with a diastereomeric ratio of 2.3:1 as determined by <sup>1</sup>H-NMR. Yield: 9.1 mg (31%). The metal-centered configuration was assigned by CD spectroscopy (Figure S8).

<sup>1</sup>H-NMR (300.1 MHz, CD<sub>3</sub>CN) for the major diastereomer: δ (ppm) 8.96 (dq, *J* = 5.7, 0.6 Hz, 1H), 8.81 (m, 1H), 8.50 (d, *J* = 8.1 Hz, 1H), 8.46 (d, *J* = 8.1 Hz, 1H), 8.09 (td, *J* = 7.8, 1.5 Hz, 1H), 7.54-8.02 (m, 9 H), 7.47 (ddd, *J* = 7.2, 5.7, 1.2 Hz, 1H), 7.16 (m, 1H), 7.09 (ddd, *J* = 7.2, 5.7, 1.2 Hz, 1H), 7.02 (m, 1H), 6.37 (m, 2 H), 4.26 (dd, *J* = 9.0, 4.5 Hz, 1H), 4.03 (t, *J* = 9.0 Hz, 1H), 2.95 (m, 1H), 1.88 (s, 3H), 1.74-2.02 (m, 4H).

IR (film): ν (cm<sup>-1</sup>) 3072, 2971, 2912, 1606, 1536, 1461, 1442, 1418, 1387, 1346, 1309, 1260, 1233, 1156, 1074, 1035, 1018, 978, 930, 878, 830, 756, 727, 686, 656, 576.

HRMS calcd for C<sub>32</sub>H<sub>30</sub>RuSO<sub>2</sub>N<sub>5</sub> (M-PF<sub>6</sub>)<sup>+</sup> 650.1166, found: 650.1160.

CD (MeCN): λ, nm (Δε, M<sup>-1</sup>cm<sup>-1</sup>) 299 (-17), 363 (+8).

### Synthesis of Δ-[Ru(bpy)(dmb)(2g-H)]PF<sub>6</sub>

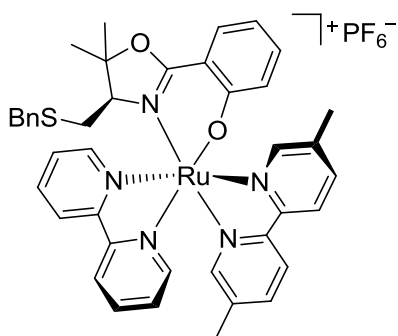

A mixture of [(η<sup>6</sup>-C<sub>6</sub>H<sub>6</sub>)Ru(bpy)Cl]Cl (**1**) (15.0 mg, 0.037 mmol), chiral oxazoline **2g** (13.4 mg), 5,5'-dimethyl-2,2'-bipyridine (8.2 mg, 0.044 mmol), and triethylamine (53.4 μL, 0.37 mmol, 10 eq) in ethanol (15 mL, 2.5 mM) was heated at reflux under argon overnight. The solvent was then

removed under reduced pressure and the residue was purified by column chromatography (CH<sub>3</sub>CN: H<sub>2</sub>O: KNO<sub>3</sub> (sat) = 150: 3: 1). The eluents were concentrated to dryness and the resulting material was dissolved in minimal amounts of ethanol/water. The product was precipitated by the addition of excess solid NH<sub>4</sub>PF<sub>6</sub>. The precipitate was centrifuged, washed twice with water, and dried under high vacuum to afford a brownish solid as a 4:1 mixture of two  $\Delta$ -diastereomers. Yield: 27.4 mg (81%). The absolute metal-centered configuration was assigned by CD spectroscopy (Figure S9).

<sup>1</sup>H-NMR (400.1 MHz, CD<sub>3</sub>CN) for the major diastereomer:  $\delta$  (ppm) 8.99 (d,  $J$  = 5.4 Hz, 1H), 8.59 (s, 1H), 8.43 (d,  $J$  = 8.0 Hz, 1H), 8.35 (d,  $J$  = 8.1 Hz, 1H), 8.31 (d,  $J$  = 8.3 Hz, 1H), 8.19 (d,  $J$  = 8.3 Hz, 1H), 7.97 (td,  $J$  = 8.0, 1.3 Hz, 1H), 7.88 (dd,  $J$  = 8.3, 1.2 Hz, 1H), 7.82 (td,  $J$  = 8.0, 1.3 Hz, 1H), 7.69 (s, 1H), 7.60 (d,  $J$  = 5.0 Hz, 1H), 7.56 (dd,  $J$  = 8.3, 0.96 Hz, 1H), 7.46 (dd,  $J$  = 8.1, 1.8 Hz, 1H), 7.41 (m, 1H), 7.28 (d,  $J$  = 7.5 Hz, 1H), 7.23 (m, 2H), 7.15 (m, 2H), 7.11 (m, 1H), 6.96 (ddd,  $J$  = 8.7, 6.9, 1.9 Hz, 1H), 6.34 (m, 1H), 6.28 (d,  $J$  = 8.6 Hz, 1H), 3.32 (m, 2H), 2.66 (m, 1H), 2.52 (m, 2H), 2.36 (s, 3H), 2.04 (s, 3H), 1.43 (s, 3H), 0.59 (s, 3H).

<sup>13</sup>C-NMR (100.6 MHz, CD<sub>3</sub>CN) for the major diastereomer:  $\delta$  (ppm) 171.1, 163.1, 159.4, 159.0, 157.9, 156.4, 154.5, 153.7, 152.5, 151.2, 139.1, 138.3, 137.9, 137.7, 136.6, 136.6, 136.5, 133.6, 130.5, 129.7, 129.6, 129.6, 129.5, 128.1, 128.1, 126.5, 126.5, 124.3, 124.1, 123.9, 123.3, 113.8, 86.2, 72.7, 37.9, 33.9, 27.9, 21.4, 18.8, 18.3.

IR (film):  $\nu$  (cm<sup>-1</sup>) 3072, 2971, 2912, 1606, 1536, 1461, 1442, 1418, 1387, 1346, 1309, 1260, 1233, 1156, 1074, 1035, 1018, 978, 930, 878, 830, 756, 727, 686, 656, 576.

HRMS calcd for C<sub>41</sub>H<sub>40</sub>N<sub>5</sub>O<sub>2</sub>RuS (M-PF<sub>6</sub>)<sup>+</sup> 768.1946, found: 768.1935.

CD (MeCN):  $\lambda$ , nm ( $\Delta\epsilon$ , M<sup>-1</sup>cm<sup>-1</sup>) 304 (-104), 289 (+27).



### Synthesis of osmium complex $\Delta$ -5

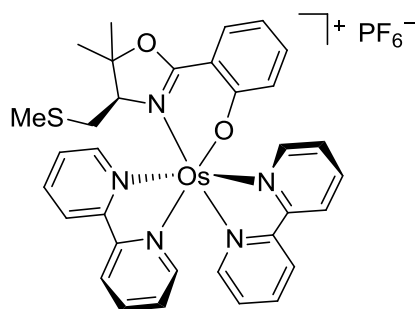

A mixture of  $[(\eta^6\text{-C}_6\text{H}_6)\text{Os}(\text{bpy})\text{Cl}]\text{Cl}$  (**4**)<sup>[2]</sup> (165.3 mg, 0.334 mmol, 1.0 eq), chiral oxazoline **2d** (94.5 mg, 0.376 mmol, 1.1 eq), 2,2'-bipyridine (63.3 mg, 0.401 mmol, 1.2 eq), and  $\text{K}_2\text{CO}_3$  (468.4 mg, 3.36 mmol, 10 eq) in ethylene glycol (3.4 mL, 100 mM) was heated at 150 °C for 3 h under argon. The reaction mixture was cooled down, into which  $\text{NH}_4\text{PF}_6$  (220 mg, 1.35 mmol, 4 eq) in 9 mL of  $\text{H}_2\text{O}$  was added to precipitate the crude product as  $\text{PF}_6$  salt. The dark-brown precipitation was collected by centrifugation, washed with cold water, dried under high vacuum, and then subjected to silica gel chromatography ( $\text{CH}_2\text{Cl}_2$ : acetone: aqueous ammonia = 7 : 1: 0.005). The eluents were concentrated to dryness and washed by ether to afford the product with a diastereomer ratio ( $\Delta$ : $\Lambda$ ) of 11:1 as determined by  $^1\text{H}$  NMR (Yield: 158 mg, 53%). The pure diastereomer  $\Delta$ -5 could be obtained by an additional precipitation of an acetone solution of  $\Delta$ -5 with  $\text{Et}_2\text{O}$  (ratio acetone: $\text{Et}_2\text{O}$  = 7 : 1, volume 8 mL). Overall yield: 117 mg (39.0%). The metal-centered configuration was assigned by CD spectroscopy (Figure S10) and confirmed by X-ray crystallography (Figure S19).

$^1\text{H}$ -NMR (400.1 MHz, acetone- $d_6$ ) for the major diastereomer:  $\delta$  (ppm) 9.06 (d,  $J$  = 6.0 Hz, 1H), 8.79 (d,  $J$  = 8.4 Hz, 1H), 8.71 (d,  $J$  = 6.0 Hz, 1H), 8.66 (d,  $J$  = 8.0 Hz, 1H), 8.60 (d,  $J$  = 8.0 Hz, 1H), 8.56 (d,  $J$  = 8.4 Hz, 1H), 8.14 (d,  $J$  = 5.6 Hz, 1H), 7.89 (t,  $J$  = 8.0 Hz, 1H), 7.68 (m, 3H), 7.55 (m, 2H), 7.49 (d,  $J$  = 5.6 Hz, 1H), 7.36 (t,  $J$  = 6.4 Hz, 1H), 7.07 (m, 3H), 6.43 (t,  $J$  = 7.6 Hz, 1H), 6.38

(d,  $J = 8.8$  Hz, 1H), 2.97 (dd,  $J = 12.4, 10.8$  Hz, 1H), 2.68 (d,  $J = 10.8$  Hz, 1H), 2.64 (d,  $J = 12.4$  Hz, 1H), 1.71 (s, 3H), 1.53 (s, 3H), 0.76 (s, 3H).

$^{13}\text{C}$ -NMR (100.6 MHz, acetone- $d_6$ ) for the major diastereomer:  $\delta$  (ppm) 167.6, 163.6, 161.4, 161.1, 160.0, 158.6, 154.0, 151.3, 150.3, 148.6, 136.0, 134.9, 134.6, 132.8, 132.1, 128.8, 127.8, 127.3, 126.0, 125.9, 124.6, 123.4, 123.1, 123.0, 122.9, 114.1, 110.9, 85.5, 72.1, 34.0, 27.2, 20.6, 15.0.

IR (film):  $\nu$  ( $\text{cm}^{-1}$ ) 3061, 2963, 2912, 2851, 1606, 1584, 1537, 1458, 1470, 1441, 1417, 1393, 1256, 1154, 1074, 1016, 839, 799, 724, 659, 557.

HRMS calcd for  $\text{C}_{35}\text{H}_{32}\text{N}_5\text{O}_2\text{OsS}$  ( $\text{M-PF}_6$ ) $^+$  754.1892, found: 754.1906.

CD (MeOH):  $\lambda$ , nm ( $\Delta\epsilon$ ,  $\text{M}^{-1}\text{cm}^{-1}$ ) 301 (-51), 275 (+22).

## 4. TFA-Induced Removal of Chiral Auxiliaries

### *Synthesis of $\Delta$ -[Ru(bpy)<sub>3</sub>](PF<sub>6</sub>)<sub>2</sub>*

In a sealed brown glass vial fitted with a septum, a solution of  $\Delta$ -**3g** (8.9 mg, 0.010 mmol) and 2,2'-bipyridine (23.4 mg, 0.150 mmol) in CH<sub>3</sub>CN (0.2 mL) was heated at 110 °C (oil bath temperature) for 2 h under argon atmosphere. The reaction mixture was cooled to room temperature and dried in vacuo. The crude material was subjected to silica gel chromatography with acetonitrile and later CH<sub>3</sub>CN: H<sub>2</sub>O: KNO<sub>3</sub>(sat) = 50 : 6 : 2. The product eluents were concentrated to dryness, the resulting material was dissolved in minimal amounts of ethanol/water, and the product was precipitated by the addition of excess solid NH<sub>4</sub>PF<sub>6</sub>. The orange precipitate was centrifuged, washed twice with water, and dried under high vacuum to afford  $\Delta$ -[Ru(bpy)<sub>3</sub>](PF<sub>6</sub>)<sub>2</sub> (7.8 mg, 91%). The enantiopurity (100:1 e.r.) of the product was determined by chiral HPLC analysis (Figure S14).

### *Synthesis of $\Delta$ -[Ru(bpy)(dmb)(phen)](PF<sub>6</sub>)<sub>2</sub>*

In a sealed brown glass vial fitted with a septum, a solution of  $\Delta$ -[Ru(bpy)(dmb)(**2g-H**)]PF<sub>6</sub> (9.2 mg, 0.010 mmol), trifluoroacetic acid (3.7  $\mu$ L, 0.050 mmol) and 1,10-phenanthroline (27.0 mg, 0.15 mmol) in CH<sub>3</sub>CN (0.2 mL) was heated at 110 °C (oil bath temperature) for 2 h under argon atmosphere. The reaction mixture was cooled to room temperature and dried in vacuo. The crude material was subjected to silica gel chromatography with acetonitrile and later CH<sub>3</sub>CN: H<sub>2</sub>O: KNO<sub>3</sub>(sat) = 50 : 3 : 1. The product eluents were concentrated to dryness, the resulting material was dissolved in minimal amounts of ethanol/water, and the product was precipitated by the addition of excess solid NH<sub>4</sub>PF<sub>6</sub>. The orange precipitate was centrifuged, washed twice with water, and dried under high vacuum to afford  $\Delta$ -[Ru(bpy)(dmb)(phen)](PF<sub>6</sub>)<sub>2</sub> (7.8 mg, 86%). The enantiomeric ratio

(98:2 e.r.) of the product was determined by chiral HPLC analysis (Figure S16) and the absolute metal-centered configuration was assigned by CD spectroscopy (Figure S11). CD (MeCN):  $\lambda$ , nm ( $\Delta\epsilon$ ,  $M^{-1}cm^{-1}$ ) 294 (-181), 264 (+71).

### *Synthesis of $\Delta$ -[Os(bpy)<sub>3</sub>](PF<sub>6</sub>)<sub>2</sub> ( $\Delta$ -6)*

In a sealed brown glass vial fitted with a septum, a solution of  $\Delta$ -5 (8.1 mg, 0.0090 mmol, 1.0 eq), trifluoroacetic acid (13.5  $\mu$ L, 0.18 mmol, 20 eq), and 2,2'-bipyridine (43.5 mg, 0.28 mmol, 30 eq) in acetylacetone (0.18 mL) was heated at 150 °C (oil bath temperature) for 5 h under an argon atmosphere. The reaction mixture was cooled to room temperature. The crude material was subjected to silica gel chromatography with acetonitrile and later CH<sub>3</sub>CN: H<sub>2</sub>O: KNO<sub>3</sub>(sat) =60:3:1. The product eluents were concentrated to dryness, the resulting material was dissolved in minimal amounts of ethanol/water, and the product was precipitated by the addition of excess solid NH<sub>4</sub>PF<sub>6</sub>. The orange precipitate was centrifuged, washed twice with water, and dried under high vacuum to afford  $\Delta$ -[Os(bpy)<sub>3</sub>](PF<sub>6</sub>)<sub>2</sub> (4.7 mg, 55%) with 84:1 e.r. The enantiomeric ratio of the product was determined by chiral HPLC analysis (Figure S17). The metal-centered configuration was assigned by comparison with  $\Delta$ -5 and by CD spectroscopy (Figure S12).

<sup>1</sup>H-NMR (400.1 MHz, CH<sub>3</sub>CN):  $\delta$  (ppm) 8.51 (d,  $J$  = 8.4 Hz, 6H), 7.89 (dd,  $J$  = 8.0, 1.2 Hz, 6H), 7.66 (d,  $J$  = 6.0 Hz, 6H), 7.33 (td,  $J$  = 5.6, 0.8 Hz, 6H).

<sup>13</sup>C-NMR (100.6 MHz, CH<sub>3</sub>CN):  $\delta$  (ppm) 158.9, 150.8, 137.1, 128.0, 124.8, 117.3.

IR (film):  $\nu$  (cm<sup>-1</sup>) 3356, 3195, 2922, 2851, 1658, 1632, 1462, 1446, 1422, 1180, 1142, 1075, 1026, 887, 838, 762, 728, 659, 558.

HRMS calcd for  $C_{15}H_{12}N_3Os [(M-2PF_6)/2]^+$  330.0839, found: 330.0835.

CD (MeCN):  $\lambda$ , nm ( $\Delta\epsilon$ ,  $M^{-1}cm^{-1}$ ) 296 (-183), 282 (+70).

## 5. CD Spectra of Ruthenium and Osmium Complexes

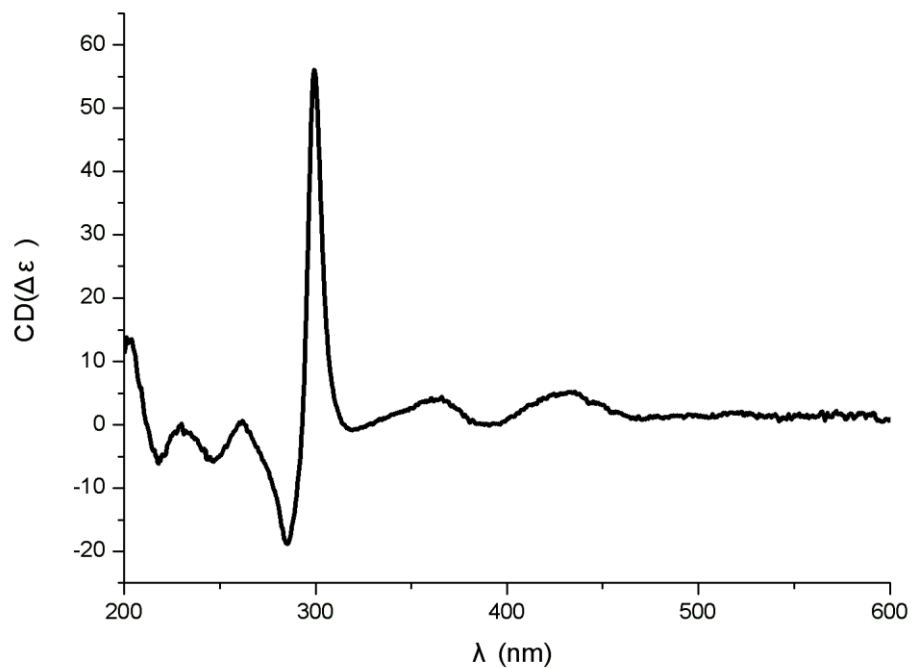

**Figure S1.** CD spectrum of  $\Delta$ -**3a** recorded in  $\text{CH}_3\text{CN}$  (0.2 mM).

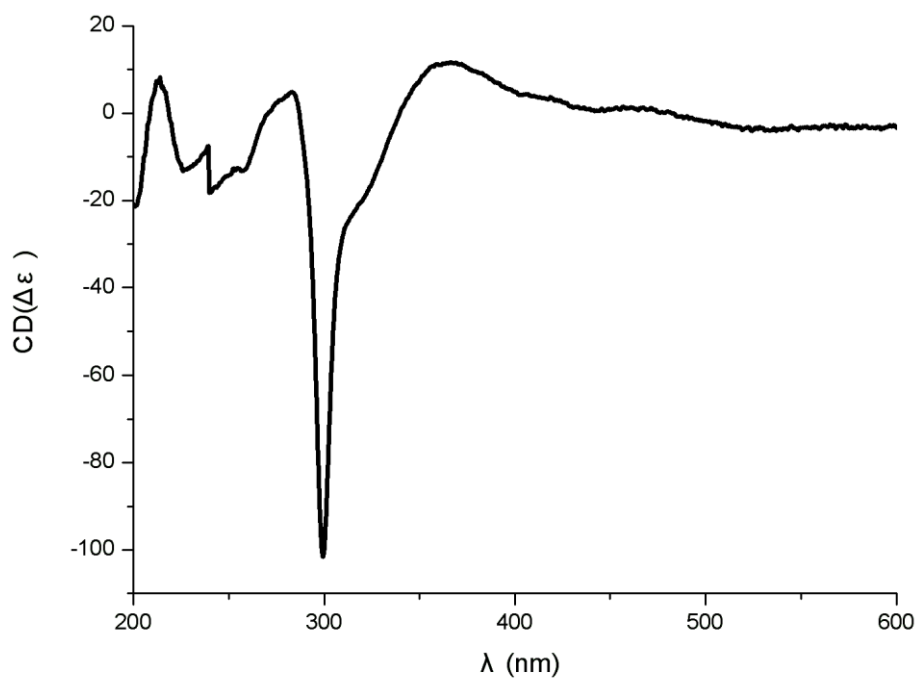

**Figure S2.** CD spectrum of  $\Delta$ -**3b** recorded in  $\text{CH}_3\text{CN}$  (0.2 mM).

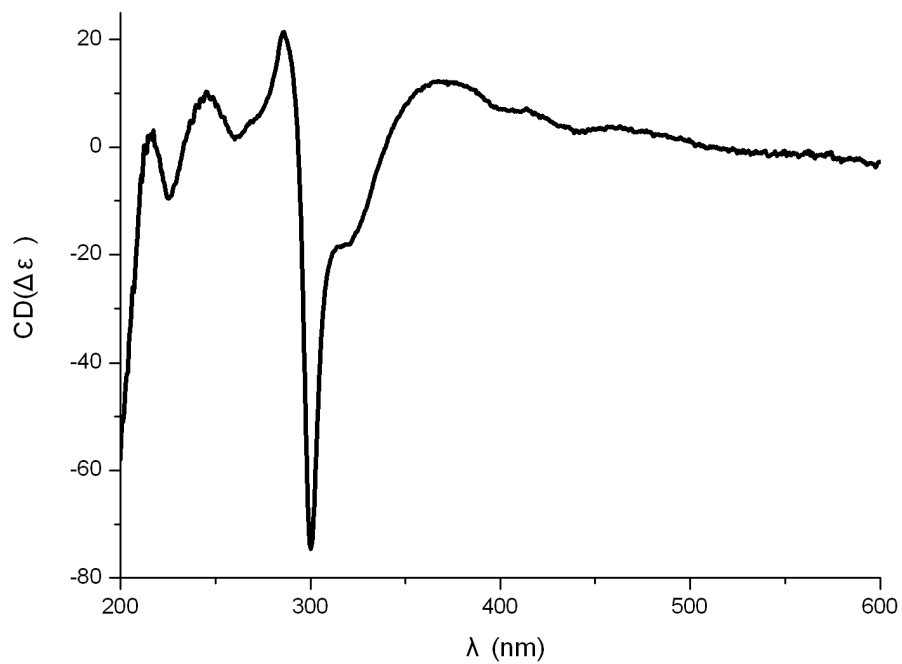

**Figure S3.** CD spectrum of  $\Delta$ -**3c** recorded in  $\text{CH}_3\text{CN}$  (0.2 mM).

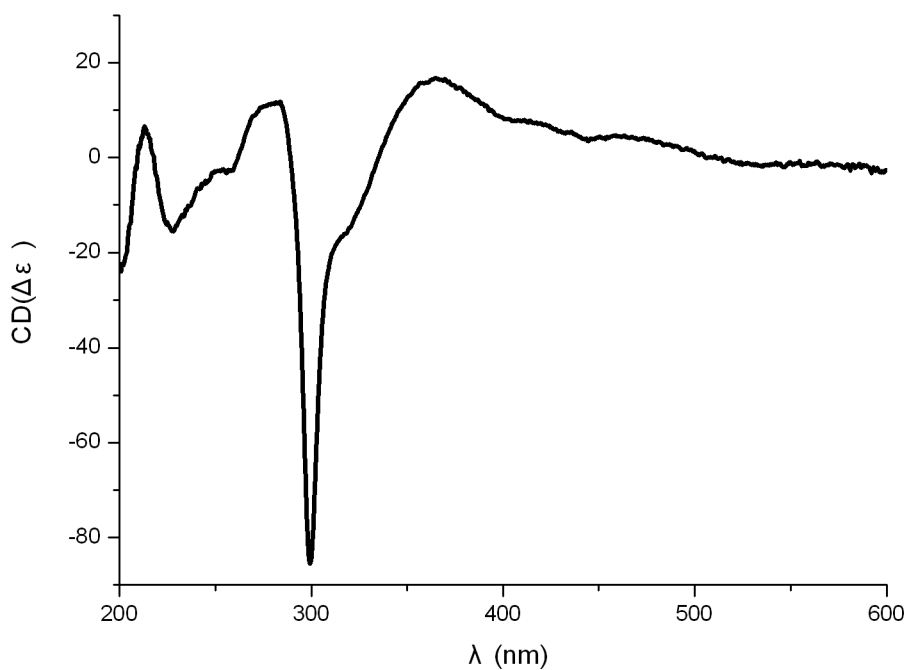

**Figure S4.** CD spectrum of  $\Delta$ -**3d** recorded in  $\text{CH}_3\text{CN}$  (0.2 mM).

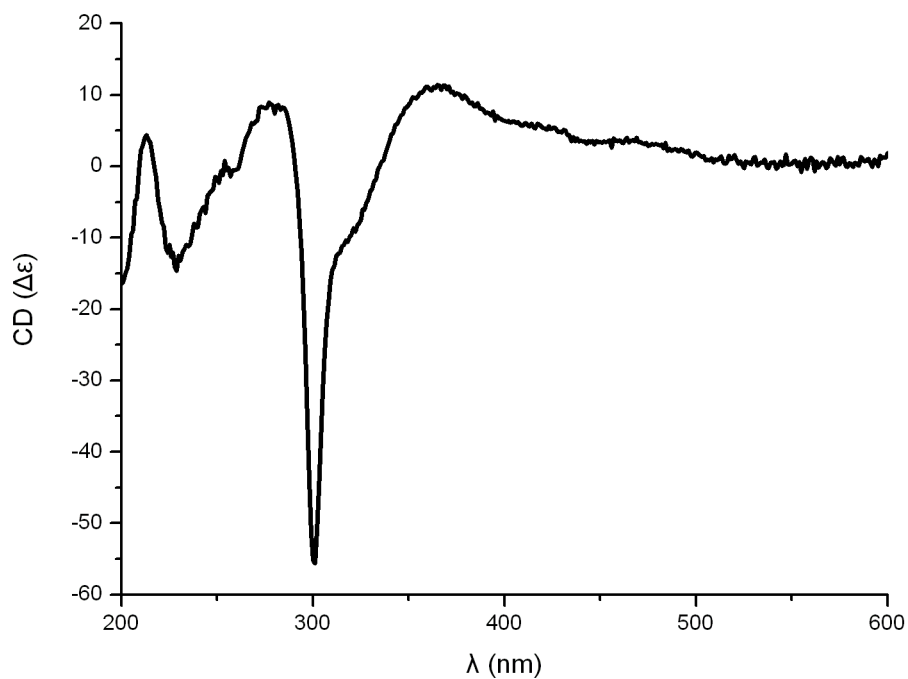

**Figure S5.** CD spectrum of  $\Delta$ -3e recorded in  $\text{CH}_3\text{CN}$  (0.2 mM).

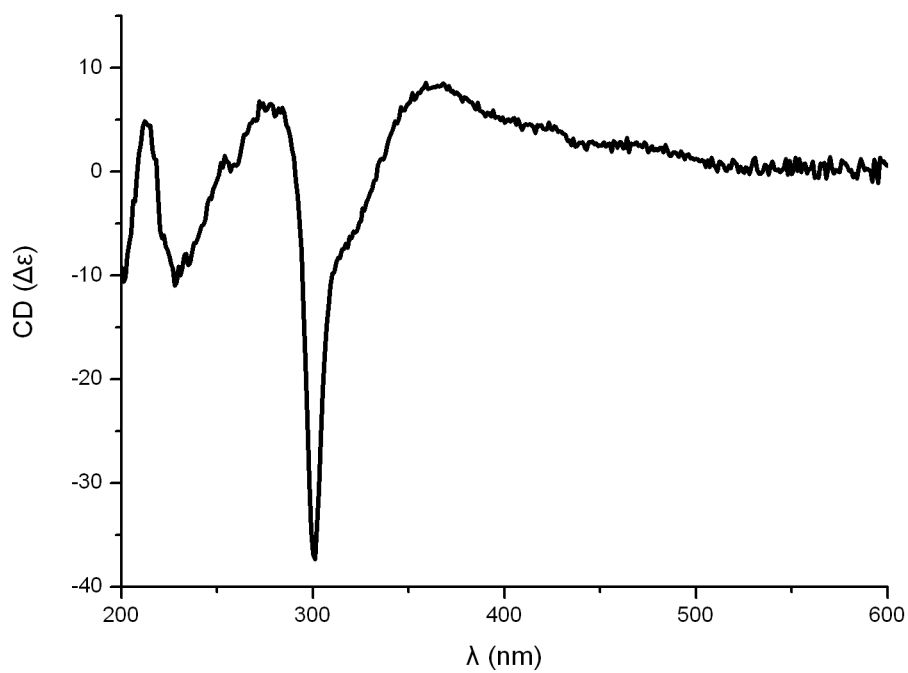

**Figure S6.** CD spectrum of  $\Delta$ -3f recorded in  $\text{CH}_3\text{CN}$  (0.2 mM).



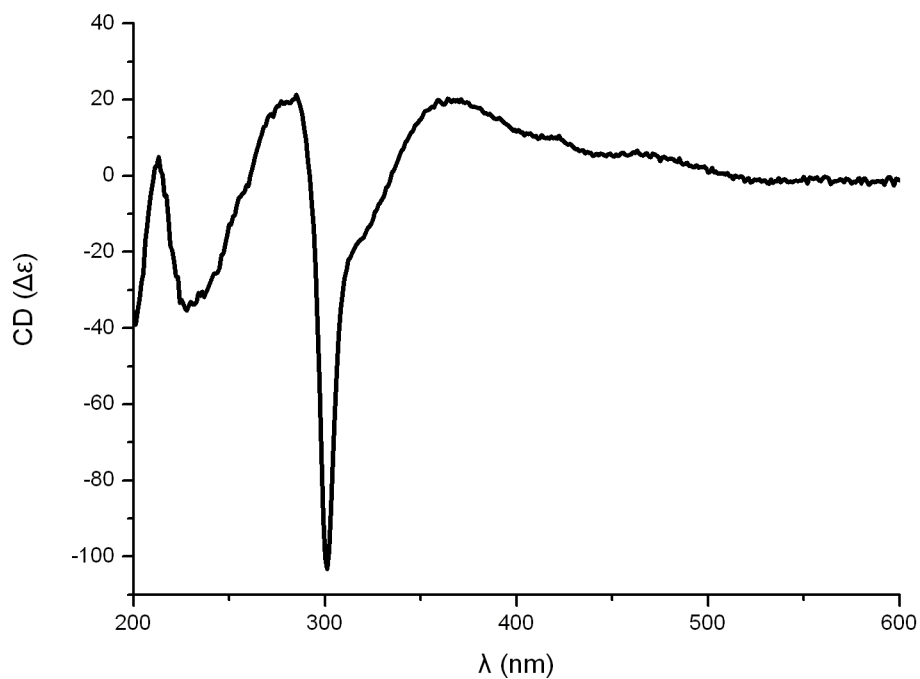

**Figure S7.** CD spectrum of  $\Delta$ -3g recorded in  $\text{CH}_3\text{CN}$  (0.2 mM).

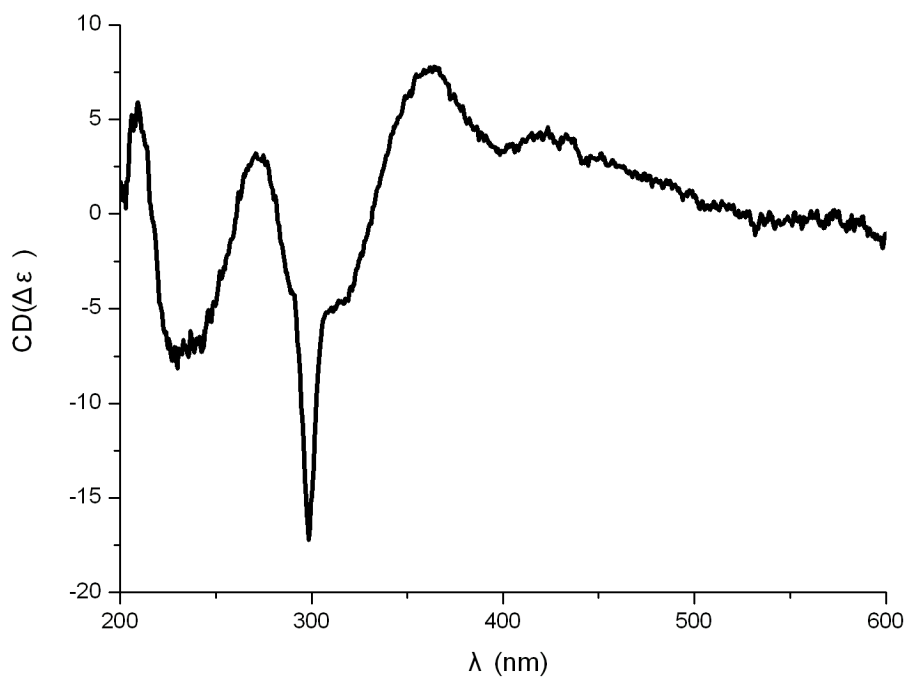

**Figure S8.** CD spectrum of  $\Delta$ -3h recorded in  $\text{CH}_3\text{CN}$  (0.2 mM).

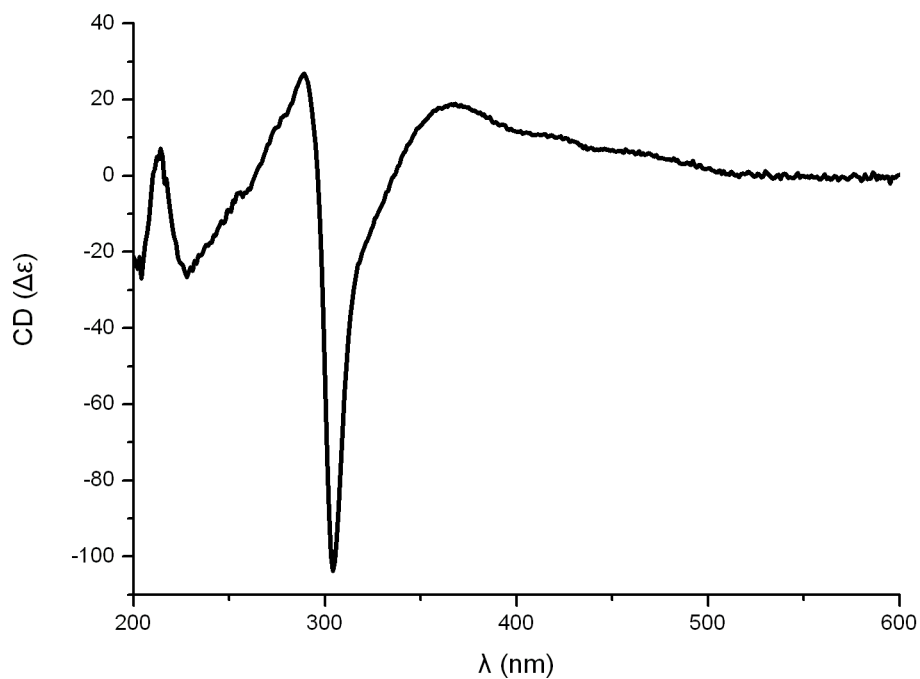

**Figure S9.** CD spectrum of  $\Delta$ -[Ru(bpy)(dmp)(**2g-H**)]PF<sub>6</sub> recorded in CH<sub>3</sub>CN (0.2 mM).

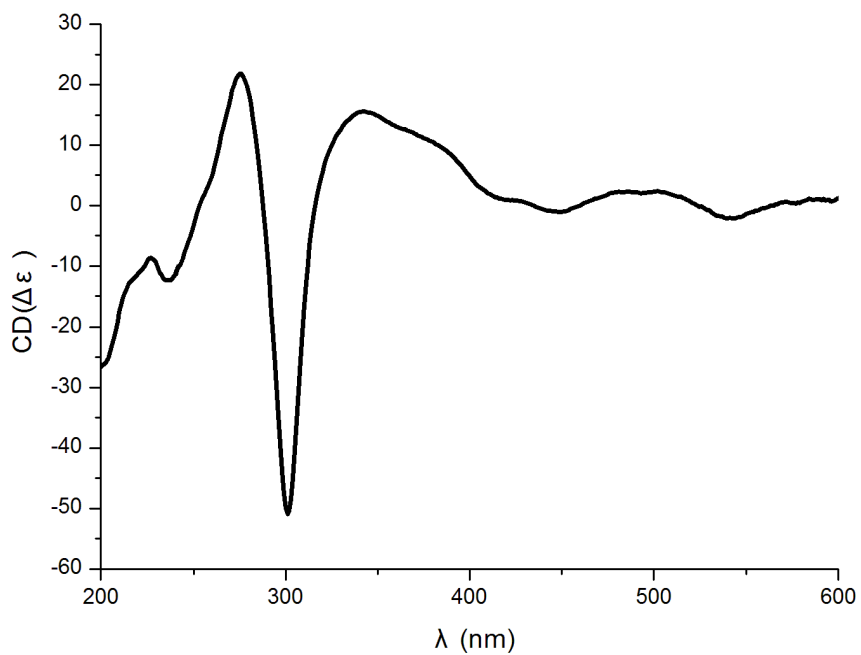

**Figure S10.** CD spectrum of  $\Delta$ -**5** recorded in CH<sub>3</sub>OH (0.2 mM).

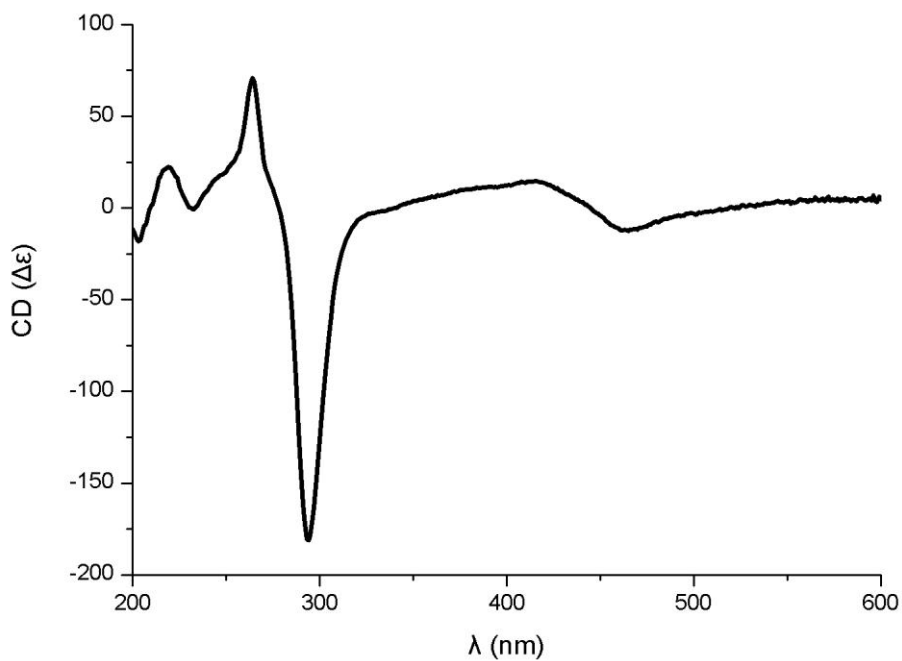

**Figure S11.** CD spectrum of  $\Delta$ -[Ru(bpy)(dmb)(phen)](PF<sub>6</sub>)<sub>2</sub> recorded in CH<sub>3</sub>CN (0.2 mM).

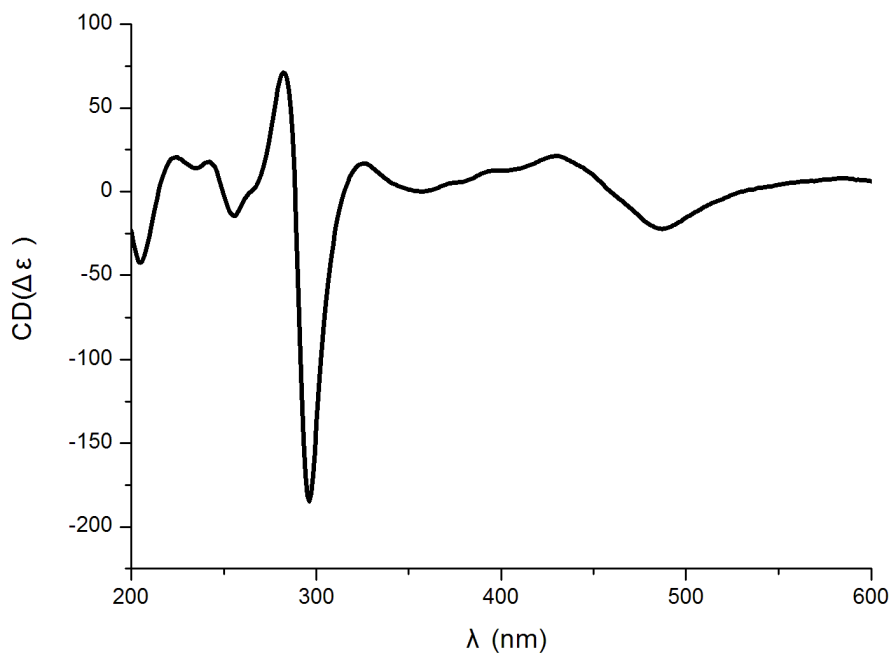

**Figure S12.** CD spectrum of  $\Delta$ -6 recorded in CH<sub>3</sub>OH (0.2 mM).

## 6. Chiral HPLC Chromatography for the Determination of Enantiomeric Ratios

$\Delta$ -[Ru(bpy)<sub>3</sub>](PF<sub>6</sub>)<sub>2</sub>: The analysis was performed with a Daicel Chiralpak IA (250 × 4.6 mm) HPLC column on an Agilent 1260 Series HPLC System. The flow rate was 0.75 mL/min, the column temperature was 40 °C, and UV-absorption was measured at 450 nm. Solvent A = 0.1% TFA, solvent B = MeCN, with a linear gradient of 12% to 27% B in 25 min.

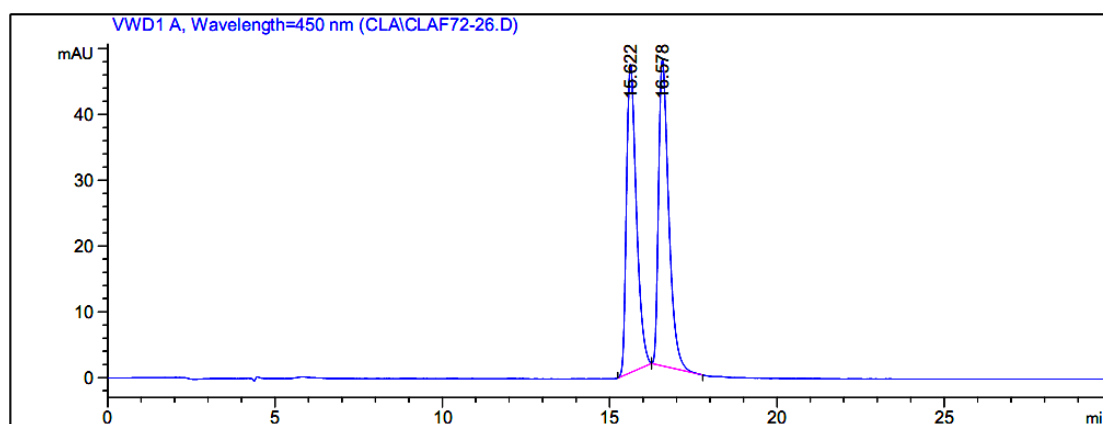

**Figure S13.** HPLC trace for the racemic reference complex  $\Delta/\Lambda$ -[Ru(bpy)<sub>3</sub>](PF<sub>6</sub>)<sub>2</sub>.

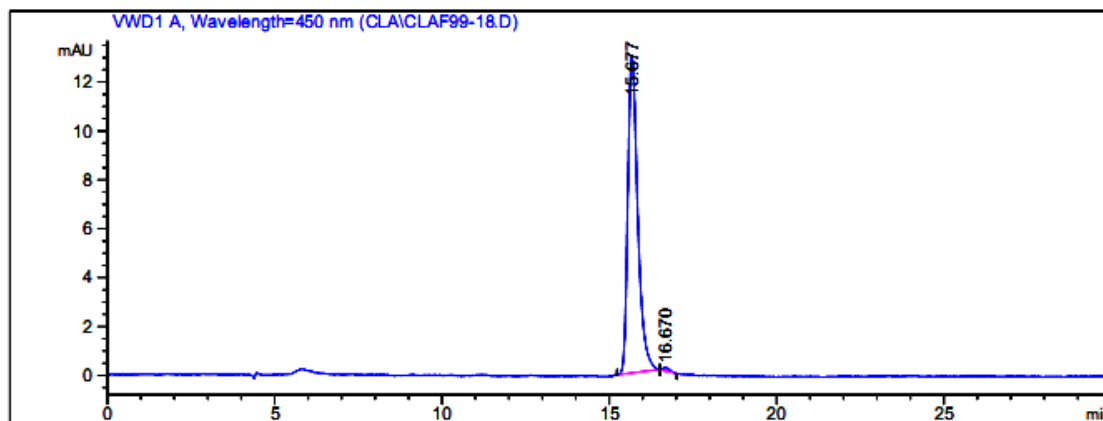

**Figure S14.** HPLC trace for the complex  $\Delta$ -[Ru(bpy)<sub>3</sub>](PF<sub>6</sub>)<sub>2</sub> synthesized from  $\Delta$ -**3g** (d.r. > 100:1).

Integration of peak areas: 100:1 e.r.

**$\Delta$ -[Ru(bpy)(dmb)(phen)](PF<sub>6</sub>)<sub>2</sub>:** The ruthenium complex was analyzed with a Daicel Chiralcel OD-R (250 × 4 mm) HPLC column on an Agilent 1260 Series HPLC System. Flow rate = 0.5 mL/min, the column temperature = 40 °C, and UV-absorption measured at 450 nm, solvent A = 0.087% H<sub>3</sub>PO<sub>4</sub>, solvent B = MeCN, with a linear gradient of 8% to 20% B in 20 min.

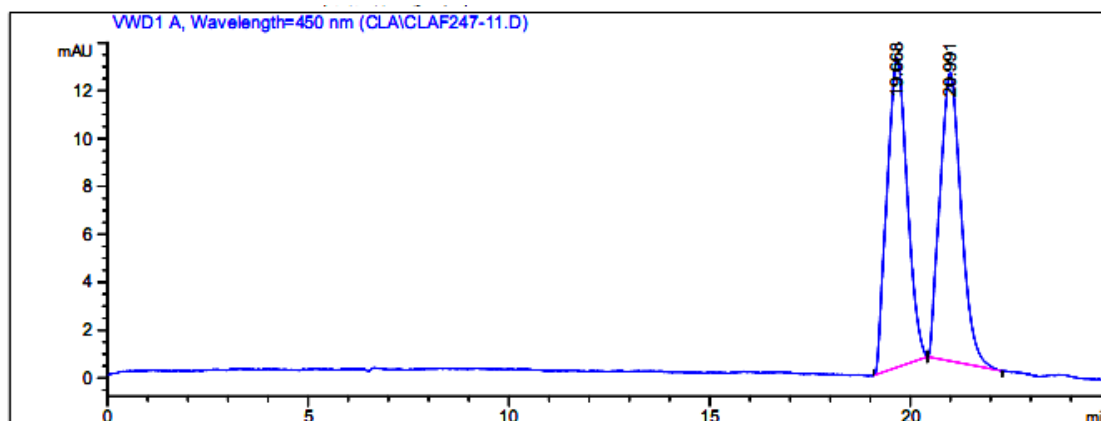

**Figure S15.** HPLC trace for racemic reference complex  $\Delta/\Lambda$ -[Ru(bpy)(dmb)(phen)](PF<sub>6</sub>)<sub>2</sub>.

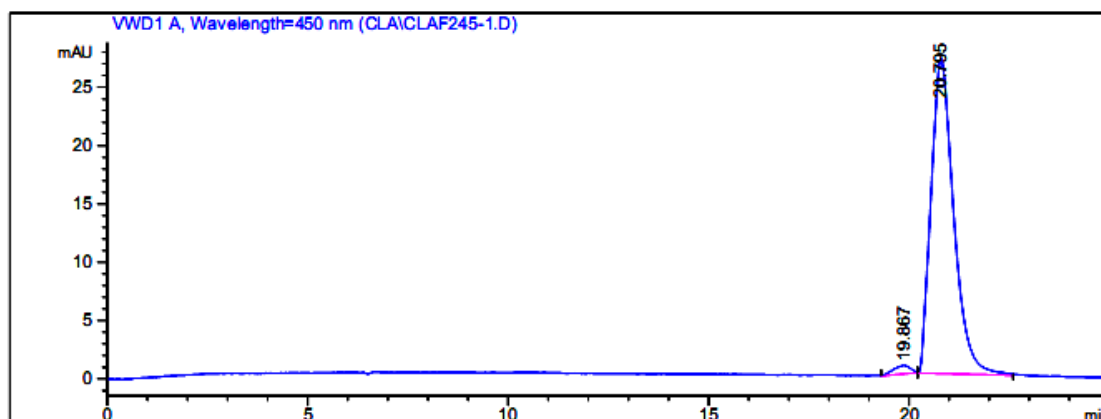

**Figure S16.** HPLC trace for the complex  $\Delta$ -[Ru(bpy)(dmb)(phen)](PF<sub>6</sub>)<sub>2</sub> synthesized from  $\Delta$ -[Ru(bpy)(dmp)(2g-H)]PF<sub>6</sub>. Integration of peak areas: 98:2 e.r.

**$\Delta$ -[Os(bpy)<sub>3</sub>](PF<sub>6</sub>)<sub>2</sub> ( $\Delta$ -6):** The analysis was performed with a Daicel Chiralpak IA (250 × 4.6 mm) HPLC column on an Agilent 1260 Series HPLC System. The flow rate was 0.75 mL/min, the column temperature was 40 °C, and UV-absorption was measured at 450 nm. Solvent A = 0.087%

H<sub>3</sub>PO<sub>4</sub>, solvent B = MeCN, with a linear gradient of 8% to 16% B in 25 min.

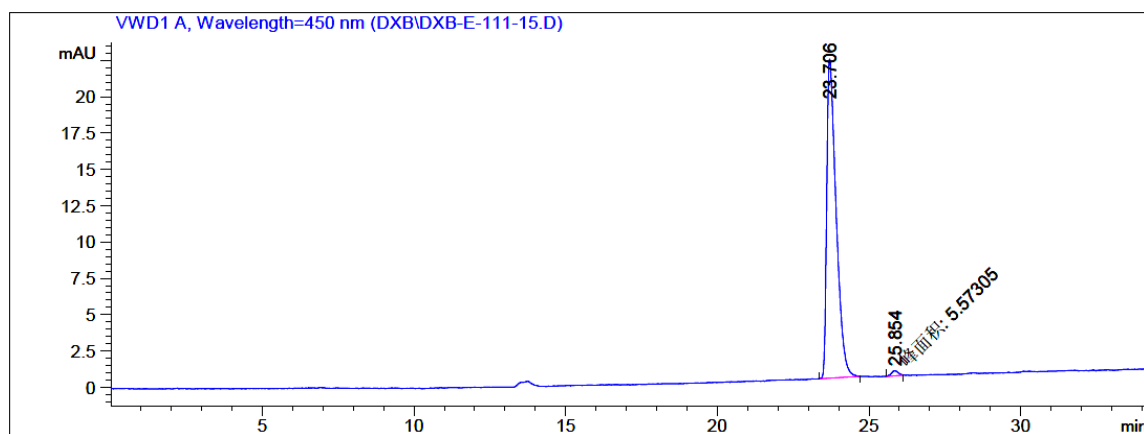

**Figure S17.** HPLC trace for complex  $\Delta$ -6 synthesized from  $\Delta$ -5. Integration of peak areas: 84:1 e.r.

## 7. Single Crystal X-Ray Diffraction with Ruthenium Complex $\Delta$ -3g and Osmium complex $\Delta$ -5

Crystals of  $\Delta$ -3g were obtained by slow diffusion from a solution in  $\text{CH}_2\text{Cl}_2$  layered with  $\text{Et}_2\text{O}$ . Data were collected on an Oxford Xcalibur, Sapphire3, Gemini ultra detector employing graphite-monochromated Mo- $\text{K}\alpha$  radiation ( $\lambda = 0.71073 \text{ \AA}$ ) at a temperature of 100 K. The structure was solved by SHELXS-97. Refinement was done by full-matrix least squares based on  $F^2$  data of one twin domain using SHELXL-97. The absolute configuration was determined. The detailed information is listed in the Tables S1-S6.

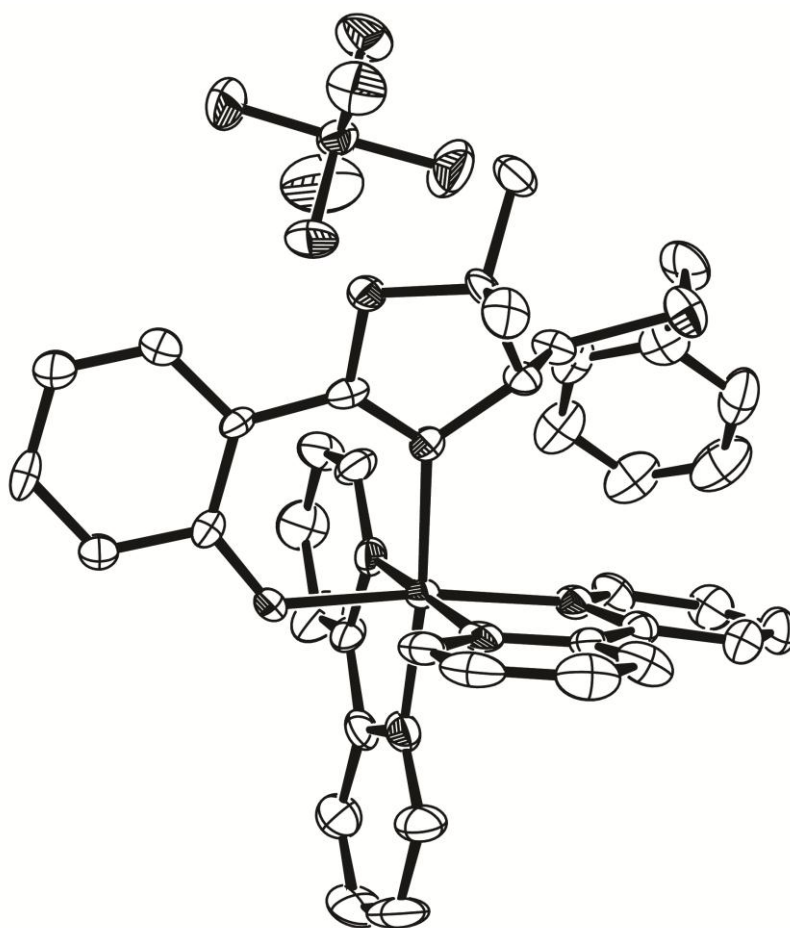

**Figure S18.** ORTEP drawing of one of the two independent molecules of compound  $\Delta$ -3g with 50% probability thermal ellipsoids. One solvent molecule (methylene chloride) was omitted for clarity.

**Table S1.** Crystal data and structure refinement for  $\Delta$ -**3g** (cla1).

|                                   |                                             |                     |
|-----------------------------------|---------------------------------------------|---------------------|
| Identification code               | cla1                                        |                     |
| Empirical formula                 | C78.50 H73 Cl F12 N10 O4 P2 Ru2 S2          |                     |
| Formula weight                    | 1812.12                                     |                     |
| Temperature                       | 173(2) K                                    |                     |
| Wavelength                        | 0.71073 Å                                   |                     |
| Crystal system                    | Orthorhombic                                |                     |
| Space group                       | P2(1)2(1)2(1)                               |                     |
| Unit cell dimensions              | a = 14.3379(5) Å                            | $\alpha = 90^\circ$ |
|                                   | b = 14.9255(5) Å                            | $\beta = 90^\circ$  |
|                                   | c = 37.3985(13) Å                           | $\gamma = 90^\circ$ |
| Volume                            | 8003.3(5) Å <sup>3</sup>                    |                     |
| Z                                 | 4                                           |                     |
| Density (calculated)              | 1.504 Mg/m <sup>3</sup>                     |                     |
| Absorption coefficient            | 0.586 mm <sup>-1</sup>                      |                     |
| F(000)                            | 3684                                        |                     |
| Crystal size                      | 0.30 x 0.17 x 0.12 mm <sup>3</sup>          |                     |
| Theta range for data collection   | 2.72 to 26.00°.                             |                     |
| Index ranges                      | -17<=h<=11, -18<=k<=9, -46<=l<=46           |                     |
| Reflections collected             | 26584                                       |                     |
| Independent reflections           | 14228 [R(int) = 0.0754]                     |                     |
| Completeness to theta = 26.00°    | 99.4 %                                      |                     |
| Absorption correction             | Semi-empirical from equivalents             |                     |
| Max. and min. transmission        | 0.9330 and 0.8437                           |                     |
| Refinement method                 | Full-matrix least-squares on F <sup>2</sup> |                     |
| Data / restraints / parameters    | 14228 / 41 / 1046                           |                     |
| Goodness-of-fit on F <sup>2</sup> | 1.001                                       |                     |
| Final R indices [I>2sigma(I)]     | R1 = 0.0666, wR2 = 0.1047                   |                     |
| R indices (all data)              | R1 = 0.0986, wR2 = 0.1155                   |                     |
| Absolute structure parameter      | 0.05(3)                                     |                     |
| Largest diff. peak and hole       | 0.774 and -0.565 e.Å <sup>-3</sup>          |                     |



**Table S2.** Atomic coordinates ( $\times 10^4$ ) and equivalent isotropic displacement parameters ( $\text{\AA}^2 \times 10^3$ ) for  $\Delta$ -**3g** (cla1).  $U(\text{eq})$  is defined as one third of the trace of the orthogonalized  $U^{ij}$  tensor.

|        | x       | y       | z        | $U(\text{eq})$ |
|--------|---------|---------|----------|----------------|
| Ru(1)  | 6767(1) | 3115(1) | 7568(1)  | 18(1)          |
| P(1)   | 3298(2) | 5499(1) | 9155(1)  | 31(1)          |
| Ru(2)  | 7364(1) | 4265(1) | 9900(1)  | 21(1)          |
| P(2)   | 5555(2) | 4201(2) | 11626(1) | 37(1)          |
| F(11)  | 3785(4) | 6117(4) | 8874(2)  | 87(2)          |
| S(11)  | 8730(1) | 5850(2) | 8010(1)  | 35(1)          |
| O(11)  | 5763(3) | 2976(3) | 7185(1)  | 28(1)          |
| N(11)  | 6744(4) | 4487(3) | 7478(1)  | 20(1)          |
| F(12)  | 2958(3) | 4829(4) | 8853(1)  | 67(2)          |
| O(12)  | 6231(4) | 5769(3) | 7242(1)  | 31(1)          |
| N(12)  | 7643(4) | 2820(3) | 7148(1)  | 20(1)          |
| F(13)  | 4226(3) | 4937(4) | 9208(1)  | 56(2)          |
| N(13)  | 6767(4) | 1760(3) | 7593(1)  | 23(1)          |
| F(14)  | 2806(3) | 4883(3) | 9448(1)  | 53(1)          |
| N(14)  | 7639(4) | 3172(4) | 7995(1)  | 22(1)          |
| F(15)  | 3613(4) | 6149(3) | 9475(1)  | 63(2)          |
| N(15)  | 5847(4) | 3344(4) | 7969(2)  | 23(2)          |
| F(16)  | 2359(3) | 6056(3) | 9111(1)  | 53(1)          |
| F(21)  | 5712(4) | 4766(3) | 11273(1) | 54(2)          |
| S(21)  | 4891(2) | 6248(1) | 10483(1) | 39(1)          |
| O(21)  | 7373(3) | 3134(3) | 9587(1)  | 30(1)          |
| N(21)  | 5954(4) | 4076(4) | 9992(1)  | 21(1)          |
| F(22)  | 4488(3) | 4084(3) | 11531(1) | 57(2)          |
| O(22)  | 4552(3) | 3429(3) | 9945(1)  | 25(1)          |
| N(22)  | 8717(4) | 4419(4) | 9752(2)  | 28(2)          |
| F(23)  | 5321(4) | 5105(3) | 11839(1) | 52(1)          |
| N(23)  | 7223(4) | 4994(4) | 9436(2)  | 27(2)          |
| F(24)  | 6626(3) | 4325(4) | 11727(1) | 59(2)          |
| N(24)  | 7512(4) | 5287(4) | 10259(2) | 25(1)          |
| F(25)  | 5802(3) | 3292(3) | 11424(1) | 45(1)          |
| N(25)  | 7540(4) | 3575(4) | 10365(2) | 25(1)          |
| F(26)  | 5409(4) | 3650(3) | 11991(1) | 60(2)          |
| C(111) | 5635(5) | 3522(5) | 6917(2)  | 23(2)          |

|        |          |         |         |       |
|--------|----------|---------|---------|-------|
| C(112) | 5209(6)  | 3157(6) | 6603(2) | 38(2) |
| C(113) | 5011(7)  | 3712(7) | 6314(2) | 49(3) |
| C(114) | 5180(6)  | 4625(6) | 6323(2) | 36(2) |
| C(115) | 5596(5)  | 4981(5) | 6621(2) | 33(2) |
| C(116) | 5827(5)  | 4456(5) | 6917(2) | 20(2) |
| C(121) | 8107(5)  | 3389(5) | 6946(2) | 26(2) |
| C(122) | 8481(5)  | 3160(5) | 6616(2) | 33(2) |
| C(123) | 8352(6)  | 2287(5) | 6498(2) | 31(2) |
| C(124) | 7883(5)  | 1682(5) | 6704(2) | 25(2) |
| C(125) | 7549(5)  | 1952(5) | 7035(2) | 22(2) |
| C(131) | 6430(6)  | 1226(5) | 7858(2) | 33(2) |
| C(132) | 6437(6)  | 315(5)  | 7841(2) | 35(2) |
| C(133) | 6780(6)  | -94(4)  | 7546(2) | 38(2) |
| C(134) | 7127(5)  | 416(5)  | 7261(2) | 32(2) |
| C(135) | 7115(5)  | 1342(4) | 7298(2) | 20(2) |
| C(141) | 8562(5)  | 2997(5) | 7997(2) | 27(2) |
| C(142) | 9092(6)  | 3028(5) | 8301(2) | 34(2) |
| C(143) | 8688(6)  | 3253(6) | 8618(2) | 41(2) |
| C(144) | 7739(6)  | 3428(5) | 8631(2) | 35(2) |
| C(145) | 7220(5)  | 3374(5) | 8319(2) | 26(2) |
| C(151) | 4922(5)  | 3392(6) | 7930(2) | 34(2) |
| C(152) | 4333(6)  | 3549(6) | 8202(2) | 40(2) |
| C(153) | 4704(7)  | 3668(6) | 8544(3) | 51(3) |
| C(154) | 5632(6)  | 3632(5) | 8590(2) | 39(2) |
| C(155) | 6206(5)  | 3465(5) | 8298(2) | 20(2) |
| C(160) | 9916(5)  | 5868(5) | 7863(2) | 36(2) |
| C(161) | 10460(5) | 4997(5) | 7929(2) | 31(2) |
| C(162) | 10802(6) | 4780(6) | 8256(2) | 34(2) |
| C(163) | 11286(5) | 4001(6) | 8312(2) | 38(2) |
| C(164) | 11442(6) | 3428(6) | 8040(2) | 39(2) |
| C(165) | 11110(6) | 3607(6) | 7704(2) | 43(2) |
| C(166) | 10618(5) | 4393(6) | 7644(2) | 43(2) |
| C(171) | 6277(5)  | 4876(5) | 7222(2) | 26(2) |
| C(172) | 6544(6)  | 6017(5) | 7599(2) | 32(2) |
| C(173) | 5691(6)  | 6100(6) | 7830(2) | 46(2) |
| C(174) | 7047(6)  | 6911(5) | 7561(3) | 60(3) |
| C(175) | 7143(5)  | 5192(4) | 7707(2) | 19(2) |
| C(176) | 8179(5)  | 5223(5) | 7652(2) | 26(2) |
| C(211) | 6653(5)  | 2719(5) | 9456(2) | 23(2) |

|        |          |         |          |       |
|--------|----------|---------|----------|-------|
| C(212) | 6824(5)  | 2042(4) | 9194(2)  | 26(2) |
| C(213) | 6110(6)  | 1608(5) | 9027(2)  | 31(2) |
| C(214) | 5178(5)  | 1787(6) | 9112(2)  | 34(2) |
| C(215) | 5001(5)  | 2412(5) | 9370(2)  | 30(2) |
| C(216) | 5702(5)  | 2879(5) | 9545(2)  | 18(2) |
| C(221) | 9461(5)  | 4090(5) | 9930(2)  | 40(2) |
| C(222) | 10358(6) | 4149(6) | 9801(3)  | 52(3) |
| C(223) | 10500(6) | 4546(6) | 9475(3)  | 53(3) |
| C(224) | 9761(6)  | 4897(6) | 9293(2)  | 42(2) |
| C(225) | 8861(6)  | 4822(5) | 9434(2)  | 31(2) |
| C(231) | 6421(5)  | 5267(5) | 9286(2)  | 33(2) |
| C(232) | 6377(6)  | 5723(6) | 8971(2)  | 37(2) |
| C(233) | 7171(7)  | 5935(7) | 8803(2)  | 52(3) |
| C(234) | 8017(6)  | 5677(7) | 8952(2)  | 51(3) |
| C(235) | 8040(5)  | 5181(5) | 9261(2)  | 28(2) |
| C(241) | 7576(6)  | 6178(4) | 10179(2) | 29(2) |
| C(242) | 7746(6)  | 6804(5) | 10432(2) | 37(2) |
| C(243) | 7849(6)  | 6570(5) | 10780(2) | 40(2) |
| C(244) | 7792(5)  | 5677(5) | 10866(2) | 35(2) |
| C(245) | 7634(5)  | 5047(5) | 10605(2) | 23(2) |
| C(251) | 7495(5)  | 2680(5) | 10396(2) | 30(2) |
| C(252) | 7524(5)  | 2261(5) | 10727(2) | 36(2) |
| C(253) | 7588(6)  | 2763(5) | 11035(2) | 40(2) |
| C(254) | 7638(6)  | 3684(5) | 11001(2) | 37(2) |
| C(255) | 7598(5)  | 4079(5) | 10666(2) | 23(2) |
| C(260) | 4557(6)  | 7222(5) | 10221(2) | 47(2) |
| C(261) | 5357(6)  | 7634(5) | 10013(2) | 38(2) |
| C(262) | 5548(6)  | 7394(5) | 9662(2)  | 36(2) |
| C(263) | 6283(7)  | 7785(5) | 9482(2)  | 46(2) |
| C(264) | 6841(7)  | 8416(6) | 9644(2)  | 51(3) |
| C(265) | 6669(8)  | 8662(6) | 9991(3)  | 67(3) |
| C(266) | 5924(7)  | 8269(6) | 10177(2) | 51(3) |
| C(271) | 5456(5)  | 3491(5) | 9833(2)  | 21(2) |
| C(272) | 4511(5)  | 3931(5) | 10290(2) | 24(2) |
| C(273) | 4643(6)  | 3244(5) | 10585(2) | 31(2) |
| C(274) | 3548(5)  | 4342(5) | 10307(2) | 34(2) |
| C(275) | 5370(5)  | 4550(4) | 10265(2) | 21(2) |
| C(276) | 5194(5)  | 5502(4) | 10123(2) | 28(2) |
| C(1S)  | 8622(7)  | 8948(8) | 8612(4)  | 33(4) |

|        |          |          |         |       |
|--------|----------|----------|---------|-------|
| CI(1A) | 9032(7)  | 7756(6)  | 8675(3) | 59(3) |
| CI(1B) | 8702(6)  | 7993(5)  | 8391(2) | 32(2) |
| CI(2A) | 7405(10) | 8796(11) | 8591(4) | 48(4) |
| CI(2B) | 7406(10) | 9159(10) | 8689(4) | 20(4) |
| CI(2C) | 7539(8)  | 9420(9)  | 8763(4) | 15(3) |

---

**Table S3.** Bond lengths [ $\text{\AA}$ ] and angles [ $^\circ$ ] for  $\Delta$ -**3g** (cla1).

---

|              |          |
|--------------|----------|
| Ru(1)-N(13)  | 2.024(5) |
| Ru(1)-N(15)  | 2.025(6) |
| Ru(1)-N(14)  | 2.030(6) |
| Ru(1)-O(11)  | 2.043(5) |
| Ru(1)-N(12)  | 2.058(5) |
| Ru(1)-N(11)  | 2.075(5) |
| P(1)-F(11)   | 1.563(6) |
| P(1)-F(13)   | 1.586(5) |
| P(1)-F(12)   | 1.587(5) |
| P(1)-F(16)   | 1.591(5) |
| P(1)-F(14)   | 1.597(5) |
| P(1)-F(15)   | 1.606(5) |
| Ru(2)-N(22)  | 2.029(6) |
| Ru(2)-N(25)  | 2.038(6) |
| Ru(2)-N(24)  | 2.045(5) |
| Ru(2)-O(21)  | 2.053(5) |
| Ru(2)-N(23)  | 2.056(6) |
| Ru(2)-N(21)  | 2.071(6) |
| P(2)-F(22)   | 1.580(5) |
| P(2)-F(21)   | 1.585(5) |
| P(2)-F(24)   | 1.592(5) |
| P(2)-F(25)   | 1.593(5) |
| P(2)-F(23)   | 1.603(5) |
| P(2)-F(26)   | 1.605(5) |
| S(11)-C(160) | 1.787(8) |
| S(11)-C(176) | 1.813(7) |
| O(11)-C(111) | 1.303(8) |
| N(11)-C(171) | 1.306(8) |
| N(11)-C(175) | 1.471(8) |
| O(12)-C(171) | 1.338(8) |
| O(12)-C(172) | 1.457(8) |
| N(12)-C(121) | 1.317(8) |
| N(12)-C(125) | 1.369(8) |
| N(13)-C(135) | 1.360(8) |
| N(13)-C(131) | 1.360(9) |
| N(14)-C(141) | 1.349(9) |
| N(14)-C(145) | 1.384(8) |

|               |           |
|---------------|-----------|
| N(15)-C(151)  | 1.336(9)  |
| N(15)-C(155)  | 1.348(8)  |
| S(21)-C(276)  | 1.800(7)  |
| S(21)-C(260)  | 1.818(8)  |
| O(21)-C(211)  | 1.300(8)  |
| N(21)-C(271)  | 1.275(8)  |
| N(21)-C(275)  | 1.497(8)  |
| O(22)-C(271)  | 1.366(8)  |
| O(22)-C(272)  | 1.492(8)  |
| N(22)-C(221)  | 1.349(9)  |
| N(22)-C(225)  | 1.350(9)  |
| N(23)-C(231)  | 1.344(9)  |
| N(23)-C(235)  | 1.371(9)  |
| N(24)-C(245)  | 1.353(8)  |
| N(24)-C(241)  | 1.365(8)  |
| N(25)-C(251)  | 1.343(8)  |
| N(25)-C(255)  | 1.356(8)  |
| C(111)-C(116) | 1.421(9)  |
| C(111)-C(112) | 1.431(10) |
| C(112)-C(113) | 1.389(11) |
| C(112)-H(11A) | 0.9500    |
| C(113)-C(114) | 1.384(11) |
| C(113)-H(11B) | 0.9500    |
| C(114)-C(115) | 1.369(10) |
| C(114)-H(11C) | 0.9500    |
| C(115)-C(116) | 1.397(9)  |
| C(115)-H(11D) | 0.9500    |
| C(116)-C(171) | 1.453(9)  |
| C(121)-C(122) | 1.389(9)  |
| C(121)-H(12A) | 0.9500    |
| C(122)-C(123) | 1.388(10) |
| C(122)-H(12B) | 0.9500    |
| C(123)-C(124) | 1.363(9)  |
| C(123)-H(12C) | 0.9500    |
| C(124)-C(125) | 1.389(9)  |
| C(124)-H(12D) | 0.9500    |
| C(125)-C(135) | 1.477(9)  |
| C(131)-C(132) | 1.361(10) |
| C(131)-H(13A) | 0.9500    |

|               |           |
|---------------|-----------|
| C(132)-C(133) | 1.353(10) |
| C(132)-H(13B) | 0.9500    |
| C(133)-C(134) | 1.400(10) |
| C(133)-H(13C) | 0.9500    |
| C(134)-C(135) | 1.390(9)  |
| C(134)-H(13D) | 0.9500    |
| C(141)-C(142) | 1.369(10) |
| C(141)-H(14A) | 0.9500    |
| C(142)-C(143) | 1.361(10) |
| C(142)-H(14B) | 0.9500    |
| C(143)-C(144) | 1.386(11) |
| C(143)-H(14C) | 0.9500    |
| C(144)-C(145) | 1.387(10) |
| C(144)-H(14D) | 0.9500    |
| C(145)-C(155) | 1.462(10) |
| C(151)-C(152) | 1.344(10) |
| C(151)-H(15A) | 0.9500    |
| C(152)-C(153) | 1.397(12) |
| C(152)-H(15B) | 0.9500    |
| C(153)-C(154) | 1.342(12) |
| C(153)-H(15C) | 0.9500    |
| C(154)-C(155) | 1.391(10) |
| C(154)-H(15D) | 0.9500    |
| C(160)-C(161) | 1.536(10) |
| C(160)-H(16A) | 0.9900    |
| C(160)-H(16B) | 0.9900    |
| C(161)-C(162) | 1.355(10) |
| C(161)-C(166) | 1.416(11) |
| C(162)-C(163) | 1.370(11) |
| C(162)-H(16C) | 0.9500    |
| C(163)-C(164) | 1.346(11) |
| C(163)-H(16D) | 0.9500    |
| C(164)-C(165) | 1.370(10) |
| C(164)-H(16E) | 0.9500    |
| C(165)-C(166) | 1.389(11) |
| C(165)-H(16F) | 0.9500    |
| C(166)-H(16G) | 0.9500    |
| C(172)-C(173) | 1.502(11) |
| C(172)-C(174) | 1.525(10) |

|               |           |
|---------------|-----------|
| C(172)-C(175) | 1.553(9)  |
| C(173)-H(17A) | 0.9800    |
| C(173)-H(17B) | 0.9800    |
| C(173)-H(17C) | 0.9800    |
| C(174)-H(17D) | 0.9800    |
| C(174)-H(17E) | 0.9800    |
| C(174)-H(17F) | 0.9800    |
| C(175)-C(176) | 1.501(9)  |
| C(175)-H(17G) | 1.0000    |
| C(176)-H(17H) | 0.9900    |
| C(176)-H(17I) | 0.9900    |
| C(211)-C(216) | 1.422(10) |
| C(211)-C(212) | 1.430(9)  |
| C(212)-C(213) | 1.362(9)  |
| C(212)-H(21A) | 0.9500    |
| C(213)-C(214) | 1.399(10) |
| C(213)-H(21B) | 0.9500    |
| C(214)-C(215) | 1.366(10) |
| C(214)-H(21C) | 0.9500    |
| C(215)-C(216) | 1.388(9)  |
| C(215)-H(21D) | 0.9500    |
| C(216)-C(271) | 1.457(9)  |
| C(221)-C(222) | 1.376(11) |
| C(221)-H(22A) | 0.9500    |
| C(222)-C(223) | 1.371(12) |
| C(222)-H(22B) | 0.9500    |
| C(223)-C(224) | 1.364(12) |
| C(223)-H(22C) | 0.9500    |
| C(224)-C(225) | 1.398(10) |
| C(224)-H(22D) | 0.9500    |
| C(225)-C(235) | 1.446(11) |
| C(231)-C(232) | 1.361(10) |
| C(231)-H(23A) | 0.9500    |
| C(232)-C(233) | 1.340(11) |
| C(232)-H(23B) | 0.9500    |
| C(233)-C(234) | 1.390(11) |
| C(233)-H(23C) | 0.9500    |
| C(234)-C(235) | 1.373(10) |
| C(234)-H(23D) | 0.9500    |



|               |           |
|---------------|-----------|
| C(241)-C(242) | 1.353(9)  |
| C(241)-H(24A) | 0.9500    |
| C(242)-C(243) | 1.355(10) |
| C(242)-H(24B) | 0.9500    |
| C(243)-C(244) | 1.372(10) |
| C(243)-H(24C) | 0.9500    |
| C(244)-C(245) | 1.375(9)  |
| C(244)-H(24D) | 0.9500    |
| C(245)-C(255) | 1.463(9)  |
| C(251)-C(252) | 1.389(10) |
| C(251)-H(25A) | 0.9500    |
| C(252)-C(253) | 1.375(10) |
| C(252)-H(25B) | 0.9500    |
| C(253)-C(254) | 1.382(10) |
| C(253)-H(25C) | 0.9500    |
| C(254)-C(255) | 1.386(9)  |
| C(254)-H(25D) | 0.9500    |
| C(260)-C(261) | 1.516(12) |
| C(260)-H(26A) | 0.9900    |
| C(260)-H(26B) | 0.9900    |
| C(261)-C(262) | 1.390(11) |
| C(261)-C(266) | 1.391(11) |
| C(262)-C(263) | 1.379(11) |
| C(262)-H(26C) | 0.9500    |
| C(263)-C(264) | 1.377(11) |
| C(263)-H(26D) | 0.9500    |
| C(264)-C(265) | 1.371(12) |
| C(264)-H(26E) | 0.9500    |
| C(265)-C(266) | 1.404(13) |
| C(265)-H(26F) | 0.9500    |
| C(266)-H(26G) | 0.9500    |
| C(272)-C(274) | 1.513(9)  |
| C(272)-C(273) | 1.519(9)  |
| C(272)-C(275) | 1.543(10) |
| C(273)-H(27A) | 0.9800    |
| C(273)-H(27B) | 0.9800    |
| C(273)-H(27C) | 0.9800    |
| C(274)-H(27D) | 0.9800    |
| C(274)-H(27E) | 0.9800    |

|               |           |
|---------------|-----------|
| C(274)-H(27F) | 0.9800    |
| C(275)-C(276) | 1.537(9)  |
| C(275)-H(27G) | 1.0000    |
| C(276)-H(27H) | 0.9900    |
| C(276)-H(27I) | 0.9900    |
| C(1S)-Cl(1B)  | 1.651(12) |
| C(1S)-Cl(2A)  | 1.761(15) |
| C(1S)-Cl(2B)  | 1.795(16) |
| C(1S)-Cl(2C)  | 1.796(14) |
| C(1S)-Cl(1A)  | 1.888(13) |
| C(1S)-H(1SA)  | 0.9900    |
| C(1S)-H(1SB)  | 0.9900    |
| Cl(1A)-Cl(1B) | 1.216(12) |
| Cl(2A)-Cl(2B) | 0.656(17) |
| Cl(2A)-Cl(2C) | 1.15(2)   |
| Cl(2B)-Cl(2C) | 0.514(15) |

|                   |          |
|-------------------|----------|
| N(13)-Ru(1)-N(15) | 97.8(2)  |
| N(13)-Ru(1)-N(14) | 90.4(2)  |
| N(15)-Ru(1)-N(14) | 79.2(2)  |
| N(13)-Ru(1)-O(11) | 86.0(2)  |
| N(15)-Ru(1)-O(11) | 94.5(2)  |
| N(14)-Ru(1)-O(11) | 172.2(2) |
| N(13)-Ru(1)-N(12) | 79.7(2)  |
| N(15)-Ru(1)-N(12) | 176.3(2) |
| N(14)-Ru(1)-N(12) | 103.5(2) |
| O(11)-Ru(1)-N(12) | 82.7(2)  |
| N(13)-Ru(1)-N(11) | 173.2(2) |
| N(15)-Ru(1)-N(11) | 86.7(2)  |
| N(14)-Ru(1)-N(11) | 95.5(2)  |
| O(11)-Ru(1)-N(11) | 88.6(2)  |
| N(12)-Ru(1)-N(11) | 95.6(2)  |
| F(11)-P(1)-F(13)  | 91.2(3)  |
| F(11)-P(1)-F(12)  | 91.7(3)  |
| F(13)-P(1)-F(12)  | 90.8(3)  |
| F(11)-P(1)-F(16)  | 90.0(3)  |
| F(13)-P(1)-F(16)  | 178.7(3) |
| F(12)-P(1)-F(16)  | 89.7(3)  |
| F(11)-P(1)-F(14)  | 178.8(3) |

|                     |          |
|---------------------|----------|
| F(13)-P(1)-F(14)    | 88.9(3)  |
| F(12)-P(1)-F(14)    | 89.4(3)  |
| F(16)-P(1)-F(14)    | 89.9(3)  |
| F(11)-P(1)-F(15)    | 91.1(3)  |
| F(13)-P(1)-F(15)    | 89.5(3)  |
| F(12)-P(1)-F(15)    | 177.1(3) |
| F(16)-P(1)-F(15)    | 89.9(3)  |
| F(14)-P(1)-F(15)    | 87.7(3)  |
| N(22)-Ru(2)-N(25)   | 99.8(2)  |
| N(22)-Ru(2)-N(24)   | 89.7(2)  |
| N(25)-Ru(2)-N(24)   | 78.6(2)  |
| N(22)-Ru(2)-O(21)   | 86.2(2)  |
| N(25)-Ru(2)-O(21)   | 94.0(2)  |
| N(24)-Ru(2)-O(21)   | 170.8(2) |
| N(22)-Ru(2)-N(23)   | 78.8(2)  |
| N(25)-Ru(2)-N(23)   | 177.9(3) |
| N(24)-Ru(2)-N(23)   | 99.7(2)  |
| O(21)-Ru(2)-N(23)   | 87.5(2)  |
| N(22)-Ru(2)-N(21)   | 173.7(2) |
| N(25)-Ru(2)-N(21)   | 84.9(2)  |
| N(24)-Ru(2)-N(21)   | 95.4(2)  |
| O(21)-Ru(2)-N(21)   | 89.4(2)  |
| N(23)-Ru(2)-N(21)   | 96.7(2)  |
| F(22)-P(2)-F(21)    | 90.5(3)  |
| F(22)-P(2)-F(24)    | 179.2(3) |
| F(21)-P(2)-F(24)    | 89.9(3)  |
| F(22)-P(2)-F(25)    | 90.8(3)  |
| F(21)-P(2)-F(25)    | 91.4(3)  |
| F(24)-P(2)-F(25)    | 89.8(3)  |
| F(22)-P(2)-F(23)    | 90.1(3)  |
| F(21)-P(2)-F(23)    | 89.8(3)  |
| F(24)-P(2)-F(23)    | 89.2(3)  |
| F(25)-P(2)-F(23)    | 178.4(3) |
| F(22)-P(2)-F(26)    | 90.5(3)  |
| F(21)-P(2)-F(26)    | 178.5(3) |
| F(24)-P(2)-F(26)    | 89.1(3)  |
| F(25)-P(2)-F(26)    | 89.8(3)  |
| F(23)-P(2)-F(26)    | 89.0(3)  |
| C(160)-S(11)-C(176) | 101.3(4) |

|                      |          |
|----------------------|----------|
| C(111)-O(11)-Ru(1)   | 125.1(5) |
| C(171)-N(11)-C(175)  | 107.8(6) |
| C(171)-N(11)-Ru(1)   | 124.5(5) |
| C(175)-N(11)-Ru(1)   | 127.4(4) |
| C(171)-O(12)-C(172)  | 106.7(5) |
| C(121)-N(12)-C(125)  | 118.8(6) |
| C(121)-N(12)-Ru(1)   | 127.4(4) |
| C(125)-N(12)-Ru(1)   | 112.2(4) |
| C(135)-N(13)-C(131)  | 116.8(6) |
| C(135)-N(13)-Ru(1)   | 114.9(4) |
| C(131)-N(13)-Ru(1)   | 128.2(5) |
| C(141)-N(14)-C(145)  | 117.7(6) |
| C(141)-N(14)-Ru(1)   | 126.8(5) |
| C(145)-N(14)-Ru(1)   | 115.5(5) |
| C(151)-N(15)-C(155)  | 118.2(7) |
| C(151)-N(15)-Ru(1)   | 125.1(5) |
| C(155)-N(15)-Ru(1)   | 116.7(5) |
| C(276)-S(21)-C(260)  | 98.9(4)  |
| C(211)-O(21)-Ru(2)   | 127.0(4) |
| C(271)-N(21)-C(275)  | 109.2(5) |
| C(271)-N(21)-Ru(2)   | 124.2(5) |
| C(275)-N(21)-Ru(2)   | 126.5(4) |
| C(271)-O(22)-C(272)  | 105.5(5) |
| C(221)-N(22)-C(225)  | 118.3(7) |
| C(221)-N(22)-Ru(2)   | 125.5(5) |
| C(225)-N(22)-Ru(2)   | 115.9(5) |
| C(231)-N(23)-C(235)  | 118.0(6) |
| C(231)-N(23)-Ru(2)   | 126.7(5) |
| C(235)-N(23)-Ru(2)   | 115.3(5) |
| C(245)-N(24)-C(241)  | 117.3(6) |
| C(245)-N(24)-Ru(2)   | 116.3(4) |
| C(241)-N(24)-Ru(2)   | 126.1(5) |
| C(251)-N(25)-C(255)  | 118.9(6) |
| C(251)-N(25)-Ru(2)   | 124.7(5) |
| C(255)-N(25)-Ru(2)   | 115.9(4) |
| O(11)-C(111)-C(116)  | 125.8(6) |
| O(11)-C(111)-C(112)  | 116.9(7) |
| C(116)-C(111)-C(112) | 117.1(6) |
| C(113)-C(112)-C(111) | 119.8(8) |

|                      |          |
|----------------------|----------|
| C(113)-C(112)-H(11A) | 120.1    |
| C(111)-C(112)-H(11A) | 120.1    |
| C(114)-C(113)-C(112) | 122.2(8) |
| C(114)-C(113)-H(11B) | 118.9    |
| C(112)-C(113)-H(11B) | 118.9    |
| C(115)-C(114)-C(113) | 118.5(7) |
| C(115)-C(114)-H(11C) | 120.8    |
| C(113)-C(114)-H(11C) | 120.8    |
| C(114)-C(115)-C(116) | 122.1(7) |
| C(114)-C(115)-H(11D) | 119.0    |
| C(116)-C(115)-H(11D) | 119.0    |
| C(115)-C(116)-C(111) | 120.2(6) |
| C(115)-C(116)-C(171) | 119.1(7) |
| C(111)-C(116)-C(171) | 120.6(6) |
| N(12)-C(121)-C(122)  | 123.1(7) |
| N(12)-C(121)-H(12A)  | 118.4    |
| C(122)-C(121)-H(12A) | 118.4    |
| C(123)-C(122)-C(121) | 117.5(7) |
| C(123)-C(122)-H(12B) | 121.3    |
| C(121)-C(122)-H(12B) | 121.3    |
| C(124)-C(123)-C(122) | 120.6(6) |
| C(124)-C(123)-H(12C) | 119.7    |
| C(122)-C(123)-H(12C) | 119.7    |
| C(123)-C(124)-C(125) | 118.8(6) |
| C(123)-C(124)-H(12D) | 120.6    |
| C(125)-C(124)-H(12D) | 120.6    |
| N(12)-C(125)-C(124)  | 121.1(6) |
| N(12)-C(125)-C(135)  | 114.8(5) |
| C(124)-C(125)-C(135) | 124.1(6) |
| N(13)-C(131)-C(132)  | 123.3(7) |
| N(13)-C(131)-H(13A)  | 118.4    |
| C(132)-C(131)-H(13A) | 118.4    |
| C(133)-C(132)-C(131) | 119.4(7) |
| C(133)-C(132)-H(13B) | 120.3    |
| C(131)-C(132)-H(13B) | 120.3    |
| C(132)-C(133)-C(134) | 120.2(6) |
| C(132)-C(133)-H(13C) | 119.9    |
| C(134)-C(133)-H(13C) | 119.9    |
| C(135)-C(134)-C(133) | 117.4(7) |

|                      |          |
|----------------------|----------|
| C(135)-C(134)-H(13D) | 121.3    |
| C(133)-C(134)-H(13D) | 121.3    |
| N(13)-C(135)-C(134)  | 122.8(6) |
| N(13)-C(135)-C(125)  | 114.3(6) |
| C(134)-C(135)-C(125) | 122.8(6) |
| N(14)-C(141)-C(142)  | 122.7(7) |
| N(14)-C(141)-H(14A)  | 118.6    |
| C(142)-C(141)-H(14A) | 118.6    |
| C(143)-C(142)-C(141) | 119.7(7) |
| C(143)-C(142)-H(14B) | 120.1    |
| C(141)-C(142)-H(14B) | 120.1    |
| C(142)-C(143)-C(144) | 119.7(8) |
| C(142)-C(143)-H(14C) | 120.2    |
| C(144)-C(143)-H(14C) | 120.2    |
| C(143)-C(144)-C(145) | 119.1(8) |
| C(143)-C(144)-H(14D) | 120.5    |
| C(145)-C(144)-H(14D) | 120.5    |
| N(14)-C(145)-C(144)  | 121.1(7) |
| N(14)-C(145)-C(155)  | 113.9(6) |
| C(144)-C(145)-C(155) | 124.9(7) |
| N(15)-C(151)-C(152)  | 123.4(8) |
| N(15)-C(151)-H(15A)  | 118.3    |
| C(152)-C(151)-H(15A) | 118.3    |
| C(151)-C(152)-C(153) | 118.5(8) |
| C(151)-C(152)-H(15B) | 120.7    |
| C(153)-C(152)-H(15B) | 120.7    |
| C(154)-C(153)-C(152) | 119.3(8) |
| C(154)-C(153)-H(15C) | 120.4    |
| C(152)-C(153)-H(15C) | 120.4    |
| C(153)-C(154)-C(155) | 119.6(8) |
| C(153)-C(154)-H(15D) | 120.2    |
| C(155)-C(154)-H(15D) | 120.2    |
| N(15)-C(155)-C(154)  | 121.0(7) |
| N(15)-C(155)-C(145)  | 114.6(6) |
| C(154)-C(155)-C(145) | 124.4(7) |
| C(161)-C(160)-S(11)  | 114.9(5) |
| C(161)-C(160)-H(16A) | 108.5    |
| S(11)-C(160)-H(16A)  | 108.5    |
| C(161)-C(160)-H(16B) | 108.5    |

|                      |          |
|----------------------|----------|
| S(11)-C(160)-H(16B)  | 108.5    |
| H(16A)-C(160)-H(16B) | 107.5    |
| C(162)-C(161)-C(166) | 118.0(8) |
| C(162)-C(161)-C(160) | 122.1(8) |
| C(166)-C(161)-C(160) | 119.8(7) |
| C(161)-C(162)-C(163) | 121.6(8) |
| C(161)-C(162)-H(16C) | 119.2    |
| C(163)-C(162)-H(16C) | 119.2    |
| C(164)-C(163)-C(162) | 120.5(8) |
| C(164)-C(163)-H(16D) | 119.7    |
| C(162)-C(163)-H(16D) | 119.7    |
| C(163)-C(164)-C(165) | 120.7(8) |
| C(163)-C(164)-H(16E) | 119.7    |
| C(165)-C(164)-H(16E) | 119.7    |
| C(164)-C(165)-C(166) | 119.4(8) |
| C(164)-C(165)-H(16F) | 120.3    |
| C(166)-C(165)-H(16F) | 120.3    |
| C(165)-C(166)-C(161) | 119.7(8) |
| C(165)-C(166)-H(16G) | 120.2    |
| C(161)-C(166)-H(16G) | 120.2    |
| N(11)-C(171)-O(12)   | 115.4(7) |
| N(11)-C(171)-C(116)  | 127.8(7) |
| O(12)-C(171)-C(116)  | 116.8(6) |
| O(12)-C(172)-C(173)  | 107.3(6) |
| O(12)-C(172)-C(174)  | 106.4(6) |
| C(173)-C(172)-C(174) | 111.5(7) |
| O(12)-C(172)-C(175)  | 101.9(5) |
| C(173)-C(172)-C(175) | 111.5(6) |
| C(174)-C(172)-C(175) | 117.1(6) |
| C(172)-C(173)-H(17A) | 109.5    |
| C(172)-C(173)-H(17B) | 109.5    |
| H(17A)-C(173)-H(17B) | 109.5    |
| C(172)-C(173)-H(17C) | 109.5    |
| H(17A)-C(173)-H(17C) | 109.5    |
| H(17B)-C(173)-H(17C) | 109.5    |
| C(172)-C(174)-H(17D) | 109.5    |
| C(172)-C(174)-H(17E) | 109.5    |
| H(17D)-C(174)-H(17E) | 109.5    |
| C(172)-C(174)-H(17F) | 109.5    |

|                      |          |
|----------------------|----------|
| H(17D)-C(174)-H(17F) | 109.5    |
| H(17E)-C(174)-H(17F) | 109.5    |
| N(11)-C(175)-C(176)  | 109.1(6) |
| N(11)-C(175)-C(172)  | 101.7(5) |
| C(176)-C(175)-C(172) | 119.3(6) |
| N(11)-C(175)-H(17G)  | 108.8    |
| C(176)-C(175)-H(17G) | 108.8    |
| C(172)-C(175)-H(17G) | 108.8    |
| C(175)-C(176)-S(11)  | 110.3(5) |
| C(175)-C(176)-H(17H) | 109.6    |
| S(11)-C(176)-H(17H)  | 109.6    |
| C(175)-C(176)-H(17I) | 109.6    |
| S(11)-C(176)-H(17I)  | 109.6    |
| H(17H)-C(176)-H(17I) | 108.1    |
| O(21)-C(211)-C(216)  | 126.3(6) |
| O(21)-C(211)-C(212)  | 117.3(7) |
| C(216)-C(211)-C(212) | 116.3(7) |
| C(213)-C(212)-C(211) | 121.4(7) |
| C(213)-C(212)-H(21A) | 119.3    |
| C(211)-C(212)-H(21A) | 119.3    |
| C(212)-C(213)-C(214) | 121.5(7) |
| C(212)-C(213)-H(21B) | 119.2    |
| C(214)-C(213)-H(21B) | 119.2    |
| C(215)-C(214)-C(213) | 117.9(7) |
| C(215)-C(214)-H(21C) | 121.0    |
| C(213)-C(214)-H(21C) | 121.1    |
| C(214)-C(215)-C(216) | 122.8(7) |
| C(214)-C(215)-H(21D) | 118.6    |
| C(216)-C(215)-H(21D) | 118.6    |
| C(215)-C(216)-C(211) | 119.9(6) |
| C(215)-C(216)-C(271) | 119.3(6) |
| C(211)-C(216)-C(271) | 120.7(6) |
| N(22)-C(221)-C(222)  | 122.9(9) |
| N(22)-C(221)-H(22A)  | 118.5    |
| C(222)-C(221)-H(22A) | 118.5    |
| C(223)-C(222)-C(221) | 118.6(9) |
| C(223)-C(222)-H(22B) | 120.7    |
| C(221)-C(222)-H(22B) | 120.7    |
| C(224)-C(223)-C(222) | 119.6(8) |



|                      |          |
|----------------------|----------|
| C(224)-C(223)-H(22C) | 120.2    |
| C(222)-C(223)-H(22C) | 120.2    |
| C(223)-C(224)-C(225) | 119.9(8) |
| C(223)-C(224)-H(22D) | 120.0    |
| C(225)-C(224)-H(22D) | 120.0    |
| N(22)-C(225)-C(224)  | 120.6(8) |
| N(22)-C(225)-C(235)  | 115.8(7) |
| C(224)-C(225)-C(235) | 123.6(7) |
| N(23)-C(231)-C(232)  | 123.6(8) |
| N(23)-C(231)-H(23A)  | 118.2    |
| C(232)-C(231)-H(23A) | 118.2    |
| C(233)-C(232)-C(231) | 119.0(8) |
| C(233)-C(232)-H(23B) | 120.5    |
| C(231)-C(232)-H(23B) | 120.5    |
| C(232)-C(233)-C(234) | 119.2(7) |
| C(232)-C(233)-H(23C) | 120.4    |
| C(234)-C(233)-H(23C) | 120.4    |
| C(235)-C(234)-C(233) | 120.6(8) |
| C(235)-C(234)-H(23D) | 119.7    |
| C(233)-C(234)-H(23D) | 119.7    |
| N(23)-C(235)-C(234)  | 119.5(7) |
| N(23)-C(235)-C(225)  | 114.0(6) |
| C(234)-C(235)-C(225) | 126.5(7) |
| C(242)-C(241)-N(24)  | 122.1(7) |
| C(242)-C(241)-H(24A) | 118.9    |
| N(24)-C(241)-H(24A)  | 118.9    |
| C(241)-C(242)-C(243) | 120.8(7) |
| C(241)-C(242)-H(24B) | 119.6    |
| C(243)-C(242)-H(24B) | 119.6    |
| C(242)-C(243)-C(244) | 117.9(7) |
| C(242)-C(243)-H(24C) | 121.1    |
| C(244)-C(243)-H(24C) | 121.0    |
| C(243)-C(244)-C(245) | 120.6(7) |
| C(243)-C(244)-H(24D) | 119.7    |
| C(245)-C(244)-H(24D) | 119.7    |
| N(24)-C(245)-C(244)  | 121.2(6) |
| N(24)-C(245)-C(255)  | 114.0(6) |
| C(244)-C(245)-C(255) | 124.8(6) |
| N(25)-C(251)-C(252)  | 121.5(7) |

|                      |          |
|----------------------|----------|
| N(25)-C(251)-H(25A)  | 119.2    |
| C(252)-C(251)-H(25A) | 119.2    |
| C(253)-C(252)-C(251) | 120.2(7) |
| C(253)-C(252)-H(25B) | 119.9    |
| C(251)-C(252)-H(25B) | 119.9    |
| C(252)-C(253)-C(254) | 117.9(7) |
| C(252)-C(253)-H(25C) | 121.0    |
| C(254)-C(253)-H(25C) | 121.0    |
| C(253)-C(254)-C(255) | 120.3(8) |
| C(253)-C(254)-H(25D) | 119.9    |
| C(255)-C(254)-H(25D) | 119.9    |
| N(25)-C(255)-C(254)  | 121.1(7) |
| N(25)-C(255)-C(245)  | 114.8(6) |
| C(254)-C(255)-C(245) | 124.0(6) |
| C(261)-C(260)-S(21)  | 113.7(6) |
| C(261)-C(260)-H(26A) | 108.8    |
| S(21)-C(260)-H(26A)  | 108.8    |
| C(261)-C(260)-H(26B) | 108.8    |
| S(21)-C(260)-H(26B)  | 108.8    |
| H(26A)-C(260)-H(26B) | 107.7    |
| C(262)-C(261)-C(266) | 118.6(8) |
| C(262)-C(261)-C(260) | 121.9(8) |
| C(266)-C(261)-C(260) | 119.5(8) |
| C(263)-C(262)-C(261) | 120.1(8) |
| C(263)-C(262)-H(26C) | 120.0    |
| C(261)-C(262)-H(26C) | 120.0    |
| C(264)-C(263)-C(262) | 121.4(9) |
| C(264)-C(263)-H(26D) | 119.3    |
| C(262)-C(263)-H(26D) | 119.3    |
| C(265)-C(264)-C(263) | 119.6(9) |
| C(265)-C(264)-H(26E) | 120.2    |
| C(263)-C(264)-H(26E) | 120.2    |
| C(264)-C(265)-C(266) | 119.7(9) |
| C(264)-C(265)-H(26F) | 120.2    |
| C(266)-C(265)-H(26F) | 120.2    |
| C(261)-C(266)-C(265) | 120.7(9) |
| C(261)-C(266)-H(26G) | 119.7    |
| C(265)-C(266)-H(26G) | 119.7    |
| N(21)-C(271)-O(22)   | 115.8(6) |

|                      |          |
|----------------------|----------|
| N(21)-C(271)-C(216)  | 129.7(6) |
| O(22)-C(271)-C(216)  | 114.5(6) |
| O(22)-C(272)-C(274)  | 106.0(6) |
| O(22)-C(272)-C(273)  | 106.6(5) |
| C(274)-C(272)-C(273) | 110.9(6) |
| O(22)-C(272)-C(275)  | 102.6(5) |
| C(274)-C(272)-C(275) | 119.2(6) |
| C(273)-C(272)-C(275) | 110.5(6) |
| C(272)-C(273)-H(27A) | 109.5    |
| C(272)-C(273)-H(27B) | 109.5    |
| H(27A)-C(273)-H(27B) | 109.5    |
| C(272)-C(273)-H(27C) | 109.5    |
| H(27A)-C(273)-H(27C) | 109.5    |
| H(27B)-C(273)-H(27C) | 109.5    |
| C(272)-C(274)-H(27D) | 109.5    |
| C(272)-C(274)-H(27E) | 109.5    |
| H(27D)-C(274)-H(27E) | 109.5    |
| C(272)-C(274)-H(27F) | 109.5    |
| H(27D)-C(274)-H(27F) | 109.5    |
| H(27E)-C(274)-H(27F) | 109.5    |
| N(21)-C(275)-C(276)  | 107.1(5) |
| N(21)-C(275)-C(272)  | 101.8(5) |
| C(276)-C(275)-C(272) | 116.3(6) |
| N(21)-C(275)-H(27G)  | 110.4    |
| C(276)-C(275)-H(27G) | 110.4    |
| C(272)-C(275)-H(27G) | 110.4    |
| C(275)-C(276)-S(21)  | 110.7(5) |
| C(275)-C(276)-H(27H) | 109.5    |
| S(21)-C(276)-H(27H)  | 109.5    |
| C(275)-C(276)-H(27I) | 109.5    |
| S(21)-C(276)-H(27I)  | 109.5    |
| H(27H)-C(276)-H(27I) | 108.1    |
| Cl(1B)-C(1S)-Cl(2A)  | 86.3(9)  |
| Cl(1B)-C(1S)-Cl(2B)  | 107.5(8) |
| Cl(2A)-C(1S)-Cl(2B)  | 21.2(6)  |
| Cl(1B)-C(1S)-Cl(2C)  | 123.8(9) |
| Cl(2A)-C(1S)-Cl(2C)  | 37.7(7)  |
| Cl(2B)-C(1S)-Cl(2C)  | 16.5(5)  |
| Cl(1B)-C(1S)-Cl(1A)  | 39.5(5)  |

|                      |          |
|----------------------|----------|
| Cl(2A)-C(1S)-Cl(1A)  | 101.1(9) |
| Cl(2B)-C(1S)-Cl(1A)  | 116.6(9) |
| Cl(2C)-C(1S)-Cl(1A)  | 126.9(9) |
| Cl(1B)-C(1S)-H(1SA)  | 119.4    |
| Cl(2A)-C(1S)-H(1SA)  | 34.7     |
| Cl(2B)-C(1S)-H(1SA)  | 14.6     |
| Cl(2C)-C(1S)-H(1SA)  | 7.5      |
| Cl(1A)-C(1S)-H(1SA)  | 119.4    |
| Cl(1B)-C(1S)-H(1SB)  | 119.4    |
| Cl(2A)-C(1S)-H(1SB)  | 138.6    |
| Cl(2B)-C(1S)-H(1SB)  | 123.5    |
| Cl(2C)-C(1S)-H(1SB)  | 110.5    |
| Cl(1A)-C(1S)-H(1SB)  | 119.4    |
| H(1SA)-C(1S)-H(1SB)  | 117.1    |
| Cl(1B)-Cl(1A)-C(1S)  | 59.7(6)  |
| Cl(1A)-Cl(1B)-C(1S)  | 80.9(7)  |
| Cl(2B)-Cl(2A)-Cl(2C) | 9.5(17)  |
| Cl(2B)-Cl(2A)-C(1S)  | 82.3(19) |
| Cl(2C)-Cl(2A)-C(1S)  | 72.8(10) |
| Cl(2C)-Cl(2B)-Cl(2A) | 158(4)   |
| Cl(2C)-Cl(2B)-C(1S)  | 82(2)    |
| Cl(2A)-Cl(2B)-C(1S)  | 76.5(19) |
| Cl(2B)-Cl(2C)-Cl(2A) | 12(2)    |
| Cl(2B)-Cl(2C)-C(1S)  | 82(2)    |
| Cl(2A)-Cl(2C)-C(1S)  | 69.5(9)  |

---

**Table S4.** Anisotropic displacement parameters ( $\text{\AA}^2 \times 10^3$ ) for  $\Delta$ -**3g** (cla1). The anisotropic displacement factor exponent takes the form:  $-2^2[h^2 a^*2U^{11} + \dots + 2 h k a^* b^* U^{12}]$

|        | U <sup>11</sup> | U <sup>22</sup> | U <sup>33</sup> | U <sup>23</sup> | U <sup>13</sup> | U <sup>12</sup> |
|--------|-----------------|-----------------|-----------------|-----------------|-----------------|-----------------|
| Ru(1)  | 19(1)           | 18(1)           | 19(1)           | -1(1)           | 0(1)            | 0(1)            |
| P(1)   | 25(1)           | 33(1)           | 35(1)           | -1(1)           | -5(1)           | 1(1)            |
| Ru(2)  | 15(1)           | 23(1)           | 25(1)           | -2(1)           | 1(1)            | -1(1)           |
| P(2)   | 42(1)           | 38(1)           | 31(1)           | -6(1)           | 4(1)            | -10(1)          |
| F(11)  | 67(4)           | 108(5)          | 87(4)           | 48(4)           | 14(4)           | -18(4)          |
| S(11)  | 28(1)           | 42(1)           | 34(1)           | -14(1)          | -4(1)           | -3(1)           |
| O(11)  | 26(3)           | 33(3)           | 24(3)           | 7(2)            | -3(2)           | -7(3)           |
| N(11)  | 21(3)           | 18(3)           | 20(3)           | -5(2)           | 3(3)            | -1(3)           |
| F(12)  | 54(4)           | 93(4)           | 54(3)           | -40(3)          | -21(3)          | 16(3)           |
| O(12)  | 39(3)           | 15(2)           | 38(3)           | 0(2)            | -6(3)           | 4(3)            |
| N(12)  | 24(3)           | 18(3)           | 18(3)           | 2(2)            | 5(3)            | -3(3)           |
| F(13)  | 30(3)           | 75(4)           | 62(3)           | -14(3)          | -12(3)          | 20(3)           |
| N(13)  | 22(3)           | 25(3)           | 22(3)           | 1(3)            | 1(3)            | 1(3)            |
| F(14)  | 52(3)           | 46(3)           | 60(3)           | 10(2)           | 3(3)            | 3(3)            |
| N(14)  | 24(3)           | 18(3)           | 24(3)           | 3(2)            | 3(3)            | 3(4)            |
| F(15)  | 65(4)           | 43(3)           | 81(4)           | -25(3)          | -25(3)          | 0(3)            |
| N(15)  | 25(3)           | 16(3)           | 28(3)           | -3(3)           | 7(3)            | -2(3)           |
| F(16)  | 45(3)           | 61(3)           | 53(3)           | 8(2)            | -3(3)           | 26(3)           |
| F(21)  | 78(4)           | 45(3)           | 40(3)           | 2(2)            | 8(3)            | -11(3)          |
| S(21)  | 47(1)           | 31(1)           | 40(1)           | -5(1)           | 9(1)            | 6(1)            |
| O(21)  | 18(2)           | 33(3)           | 39(3)           | -19(2)          | 1(3)            | 4(3)            |
| N(21)  | 19(3)           | 21(3)           | 23(3)           | -2(2)           | -1(3)           | -3(3)           |
| F(22)  | 36(3)           | 55(3)           | 79(4)           | -19(3)          | -5(3)           | -7(3)           |
| O(22)  | 19(2)           | 34(3)           | 20(2)           | -1(2)           | 4(2)            | -3(3)           |
| N(22)  | 28(4)           | 25(4)           | 32(3)           | -7(3)           | 5(3)            | -2(3)           |
| F(23)  | 60(3)           | 41(3)           | 56(3)           | -18(2)          | 6(3)            | -7(3)           |
| N(23)  | 25(3)           | 34(4)           | 23(3)           | -8(3)           | 4(3)            | -6(4)           |
| F(24)  | 43(3)           | 84(4)           | 51(3)           | -19(3)          | 1(3)            | -11(4)          |
| N(24)  | 18(4)           | 22(3)           | 35(3)           | -4(3)           | 3(3)            | -3(3)           |
| F(25)  | 56(3)           | 42(3)           | 37(2)           | -7(2)           | 6(2)            | -3(3)           |
| N(25)  | 11(3)           | 26(3)           | 38(3)           | -1(3)           | 8(3)            | -5(3)           |
| F(26)  | 92(4)           | 54(3)           | 35(3)           | 5(2)            | 12(3)           | -16(4)          |
| C(111) | 11(4)           | 30(4)           | 27(4)           | 5(3)            | 0(3)            | -5(4)           |

|        |       |       |        |        |        |        |
|--------|-------|-------|--------|--------|--------|--------|
| C(112) | 49(5) | 39(5) | 27(4)  | -3(4)  | -7(4)  | -6(5)  |
| C(113) | 56(7) | 70(7) | 21(4)  | -9(4)  | -17(5) | -11(6) |
| C(114) | 45(5) | 39(5) | 25(4)  | -2(4)  | -7(4)  | 7(5)   |
| C(115) | 30(5) | 34(5) | 34(4)  | 14(4)  | 11(4)  | 5(4)   |
| C(116) | 16(4) | 24(4) | 21(3)  | -5(3)  | -8(3)  | -1(4)  |
| C(121) | 25(4) | 30(4) | 22(4)  | -1(3)  | 1(4)   | -4(4)  |
| C(122) | 31(5) | 33(4) | 34(4)  | 4(4)   | 7(4)   | -9(5)  |
| C(123) | 36(5) | 36(4) | 22(4)  | -7(3)  | 6(4)   | 10(5)  |
| C(124) | 29(4) | 22(4) | 24(4)  | -3(3)  | -5(3)  | 7(4)   |
| C(125) | 17(4) | 20(3) | 29(4)  | -1(3)  | -3(3)  | 3(4)   |
| C(131) | 33(5) | 34(5) | 33(4)  | 4(4)   | 4(4)   | 4(5)   |
| C(132) | 33(5) | 26(4) | 44(5)  | 13(4)  | 15(4)  | -4(4)  |
| C(133) | 35(4) | 9(3)  | 70(6)  | 2(4)   | 7(6)   | -2(4)  |
| C(134) | 32(5) | 18(4) | 47(5)  | -1(3)  | 10(4)  | 1(4)   |
| C(135) | 15(4) | 20(4) | 25(4)  | 1(3)   | -4(3)  | 0(3)   |
| C(141) | 21(4) | 23(4) | 36(4)  | -2(3)  | -4(4)  | 3(4)   |
| C(142) | 25(4) | 24(4) | 52(5)  | 14(4)  | -9(4)  | 1(4)   |
| C(143) | 41(5) | 51(6) | 32(5)  | 5(4)   | -14(5) | -12(6) |
| C(144) | 44(5) | 38(5) | 23(4)  | 6(3)   | -3(4)  | -11(5) |
| C(145) | 31(4) | 17(4) | 30(4)  | -3(3)  | 4(4)   | -5(4)  |
| C(151) | 25(4) | 43(5) | 35(4)  | 1(4)   | -1(4)  | 11(5)  |
| C(152) | 26(5) | 50(6) | 43(5)  | 7(4)   | 11(4)  | 6(5)   |
| C(153) | 50(6) | 51(6) | 52(6)  | 4(5)   | 35(6)  | 12(6)  |
| C(154) | 51(6) | 33(5) | 34(5)  | -6(4)  | 11(5)  | -12(5) |
| C(155) | 26(4) | 15(4) | 20(4)  | -1(3)  | 3(4)   | -5(4)  |
| C(160) | 29(4) | 36(5) | 43(5)  | 5(4)   | -9(4)  | -4(5)  |
| C(161) | 13(4) | 42(5) | 38(5)  | 4(4)   | 5(4)   | -5(4)  |
| C(162) | 33(5) | 44(5) | 24(4)  | 4(4)   | -7(4)  | -12(5) |
| C(163) | 24(4) | 50(6) | 41(5)  | 16(4)  | 0(4)   | -16(5) |
| C(164) | 31(5) | 34(5) | 52(5)  | 5(4)   | -1(5)  | -2(5)  |
| C(165) | 43(5) | 38(5) | 46(5)  | -10(4) | 0(5)   | -1(5)  |
| C(166) | 28(4) | 69(7) | 31(5)  | -2(4)  | 4(4)   | -15(5) |
| C(171) | 20(4) | 25(4) | 35(4)  | 8(3)   | 10(4)  | 3(4)   |
| C(172) | 39(5) | 20(4) | 37(4)  | -5(3)  | -9(4)  | 6(4)   |
| C(173) | 40(5) | 48(6) | 50(5)  | -11(4) | -6(5)  | 14(5)  |
| C(174) | 61(6) | 18(4) | 100(7) | 2(5)   | -37(6) | 1(5)   |
| C(175) | 17(4) | 22(4) | 19(3)  | -5(3)  | 1(3)   | 0(4)   |
| C(176) | 27(4) | 28(4) | 23(4)  | 0(3)   | 2(4)   | -1(4)  |
| C(211) | 24(4) | 23(4) | 22(4)  | -3(3)  | -4(4)  | -4(4)  |

|        |       |       |       |        |        |        |
|--------|-------|-------|-------|--------|--------|--------|
| C(212) | 19(4) | 30(4) | 30(4) | -4(3)  | 3(4)   | -3(4)  |
| C(213) | 41(5) | 26(4) | 27(4) | -10(3) | -6(4)  | -10(4) |
| C(214) | 23(4) | 44(5) | 37(4) | -9(4)  | 4(4)   | -5(5)  |
| C(215) | 22(4) | 36(5) | 31(4) | -4(4)  | 4(4)   | 0(4)   |
| C(216) | 15(3) | 24(4) | 16(3) | 2(3)   | -2(3)  | -6(4)  |
| C(221) | 22(4) | 37(5) | 60(6) | -3(4)  | -2(5)  | -3(4)  |
| C(222) | 19(4) | 48(6) | 89(8) | 0(5)   | -13(5) | 4(5)   |
| C(223) | 22(5) | 58(7) | 79(7) | -9(6)  | 21(5)  | -11(5) |
| C(224) | 36(5) | 56(6) | 35(5) | -3(4)  | 8(5)   | -1(5)  |
| C(225) | 27(4) | 36(5) | 31(4) | -12(4) | 12(4)  | -4(4)  |
| C(231) | 24(4) | 47(5) | 28(4) | -2(4)  | -7(4)  | -5(4)  |
| C(232) | 31(4) | 57(6) | 23(4) | 8(4)   | 4(4)   | 10(5)  |
| C(233) | 56(6) | 78(7) | 24(4) | 12(4)  | -5(5)  | 11(6)  |
| C(234) | 41(5) | 82(7) | 29(4) | 7(5)   | 10(4)  | -37(6) |
| C(235) | 20(4) | 41(5) | 22(4) | -5(3)  | 4(4)   | -11(4) |
| C(241) | 31(5) | 25(4) | 31(4) | 5(3)   | 6(4)   | 7(4)   |
| C(242) | 33(5) | 20(4) | 59(5) | -7(4)  | 6(5)   | -12(5) |
| C(243) | 37(5) | 36(5) | 46(5) | -20(4) | 3(5)   | -7(5)  |
| C(244) | 34(5) | 42(5) | 30(4) | -7(4)  | -5(4)  | 2(5)   |
| C(245) | 18(4) | 26(4) | 24(4) | 1(3)   | 3(4)   | -1(4)  |
| C(251) | 17(4) | 27(4) | 46(5) | -1(3)  | -1(4)  | 2(4)   |
| C(252) | 18(4) | 27(4) | 65(6) | 15(4)  | 4(5)   | 2(4)   |
| C(253) | 31(5) | 47(5) | 42(5) | 21(4)  | 6(5)   | 0(5)   |
| C(254) | 32(5) | 39(5) | 39(4) | 12(4)  | 9(5)   | 10(5)  |
| C(255) | 15(4) | 34(4) | 21(3) | -1(3)  | -2(3)  | 4(4)   |
| C(260) | 47(6) | 26(5) | 66(6) | -7(4)  | 4(5)   | 15(5)  |
| C(261) | 42(5) | 19(4) | 54(5) | 9(4)   | -8(5)  | 8(4)   |
| C(262) | 49(6) | 24(4) | 35(5) | 5(4)   | -15(5) | 0(5)   |
| C(263) | 63(6) | 28(5) | 48(5) | 14(4)  | -20(5) | -6(5)  |
| C(264) | 58(6) | 45(5) | 51(6) | 19(4)  | -16(6) | -9(6)  |
| C(265) | 64(7) | 54(6) | 84(8) | 6(5)   | -25(7) | -20(7) |
| C(266) | 71(7) | 37(5) | 45(5) | -10(4) | -19(5) | 5(6)   |
| C(271) | 16(4) | 27(4) | 21(4) | 7(3)   | -2(3)  | -4(4)  |
| C(272) | 25(4) | 34(4) | 13(3) | 0(3)   | 7(3)   | 9(4)   |
| C(273) | 37(4) | 33(5) | 24(4) | 7(3)   | 11(4)  | -10(5) |
| C(274) | 28(4) | 32(4) | 42(4) | -9(4)  | 11(4)  | 4(4)   |
| C(275) | 18(4) | 20(4) | 25(4) | 2(3)   | 5(3)   | -4(4)  |
| C(276) | 21(4) | 29(4) | 34(4) | 2(4)   | 4(4)   | 4(4)   |
| C(1S)  | 22(7) | 36(7) | 42(7) | -2(6)  | 15(6)  | -17(7) |

|        |       |       |       |        |        |        |
|--------|-------|-------|-------|--------|--------|--------|
| Cl(1A) | 56(6) | 40(5) | 81(6) | -49(5) | 29(5)  | -29(5) |
| Cl(1B) | 43(4) | 13(3) | 41(4) | -16(3) | 6(4)   | -15(4) |
| Cl(2A) | 28(7) | 59(8) | 57(8) | 40(6)  | -17(6) | -21(7) |
| Cl(2B) | 23(7) | 11(7) | 27(7) | -25(5) | -10(5) | -2(6)  |
| Cl(2C) | 4(5)  | 27(7) | 14(6) | -11(5) | 2(5)   | -7(5)  |

---



**Table S5.** Hydrogen coordinates ( $\times 10^4$ ) and isotropic displacement parameters ( $\text{\AA}^2 \times 10^3$ ) for  $\Delta$ -**3g** (cla1).

|        | x     | y    | z    | U(eq) |
|--------|-------|------|------|-------|
| H(11A) | 5061  | 2538 | 6592 | 46    |
| H(11B) | 4751  | 3457 | 6104 | 59    |
| H(11C) | 5011  | 4996 | 6127 | 43    |
| H(11D) | 5732  | 5603 | 6625 | 39    |
| H(12A) | 8189  | 3984 | 7030 | 31    |
| H(12B) | 8813  | 3584 | 6476 | 39    |
| H(12C) | 8591  | 2109 | 6272 | 37    |
| H(12D) | 7788  | 1086 | 6622 | 30    |
| H(13A) | 6178  | 1503 | 8065 | 40    |
| H(13B) | 6203  | -30  | 8034 | 41    |
| H(13C) | 6786  | -730 | 7532 | 45    |
| H(13D) | 7360  | 139  | 7051 | 39    |
| H(14A) | 8857  | 2847 | 7777 | 32    |
| H(14B) | 9739  | 2893 | 8291 | 41    |
| H(14C) | 9055  | 3290 | 8829 | 49    |
| H(14D) | 7449  | 3582 | 8851 | 42    |
| H(15A) | 4667  | 3312 | 7697 | 41    |
| H(15B) | 3679  | 3577 | 8163 | 48    |
| H(15C) | 4304  | 3774 | 8742 | 62    |
| H(15D) | 5894  | 3719 | 8821 | 47    |
| H(16A) | 9926  | 5999 | 7604 | 43    |
| H(16B) | 10242 | 6364 | 7986 | 43    |
| H(16C) | 10704 | 5177 | 8451 | 41    |
| H(16D) | 11514 | 3865 | 8544 | 46    |
| H(16E) | 11786 | 2894 | 8082 | 47    |
| H(16F) | 11217 | 3196 | 7515 | 51    |
| H(16G) | 10387 | 4526 | 7411 | 51    |
| H(17A) | 5328  | 6624 | 7755 | 69    |
| H(17B) | 5879  | 6170 | 8080 | 69    |
| H(17C) | 5308  | 5559 | 7805 | 69    |
| H(17D) | 6600  | 7375 | 7490 | 89    |
| H(17E) | 7535  | 6859 | 7379 | 89    |
| H(17F) | 7331  | 7075 | 7791 | 89    |

|        |       |      |       |    |
|--------|-------|------|-------|----|
| H(17G) | 7012  | 5042 | 7962  | 23 |
| H(17H) | 8321  | 5509 | 7420  | 31 |
| H(17I) | 8431  | 4605 | 7647  | 31 |
| H(21A) | 7449  | 1891 | 9134  | 31 |
| H(21B) | 6248  | 1174 | 8849  | 38 |
| H(21C) | 4684  | 1484 | 8993  | 41 |
| H(21D) | 4371  | 2532 | 9432  | 36 |
| H(22A) | 9361  | 3805 | 10154 | 48 |
| H(22B) | 10867 | 3920 | 9935  | 62 |
| H(22C) | 11110 | 4577 | 9376  | 64 |
| H(22D) | 9857  | 5192 | 9071  | 51 |
| H(23A) | 5853  | 5134 | 9406  | 40 |
| H(23B) | 5791  | 5889 | 8873  | 44 |
| H(23C) | 7156  | 6258 | 8584  | 63 |
| H(23D) | 8584  | 5845 | 8839  | 61 |
| H(24A) | 7497  | 6363 | 9938  | 35 |
| H(24B) | 7794  | 7417 | 10365 | 45 |
| H(24C) | 7958  | 7009 | 10959 | 47 |
| H(24D) | 7863  | 5493 | 11107 | 42 |
| H(25A) | 7442  | 2324 | 10186 | 36 |
| H(25B) | 7500  | 1626 | 10742 | 44 |
| H(25C) | 7599  | 2486 | 11263 | 48 |
| H(25D) | 7699  | 4048 | 11208 | 44 |
| H(26A) | 4061  | 7045 | 10051 | 56 |
| H(26B) | 4293  | 7680 | 10383 | 56 |
| H(26C) | 5171  | 6960 | 9545  | 43 |
| H(26D) | 6407  | 7615 | 9242  | 55 |
| H(26E) | 7343  | 8680 | 9516  | 62 |
| H(26F) | 7052  | 9097 | 10105 | 81 |
| H(26G) | 5806  | 8439 | 10418 | 61 |
| H(27A) | 4096  | 2851 | 10596 | 47 |
| H(27B) | 4716  | 3553 | 10815 | 47 |
| H(27C) | 5200  | 2885 | 10536 | 47 |
| H(27D) | 3080  | 3866 | 10323 | 51 |
| H(27E) | 3436  | 4698 | 10090 | 51 |
| H(27F) | 3503  | 4730 | 10517 | 51 |
| H(27G) | 5703  | 4574 | 10499 | 25 |
| H(27H) | 4681  | 5489 | 9946  | 34 |
| H(27I) | 5762  | 5726 | 10002 | 34 |

|        |      |      |      |    |
|--------|------|------|------|----|
| H(1SA) | 8012 | 9133 | 8712 | 40 |
| H(1SB) | 9086 | 9426 | 8568 | 40 |

---

**Table S6.** Torsion angles [°] for  $\Delta$ -**3g** (cla1).

---

|                          |            |
|--------------------------|------------|
| N(13)-Ru(1)-O(11)-C(111) | -148.9(6)  |
| N(15)-Ru(1)-O(11)-C(111) | 113.6(6)   |
| N(14)-Ru(1)-O(11)-C(111) | 148.3(15)  |
| N(12)-Ru(1)-O(11)-C(111) | -68.8(6)   |
| N(11)-Ru(1)-O(11)-C(111) | 27.0(6)    |
| N(13)-Ru(1)-N(11)-C(171) | 30(2)      |
| N(15)-Ru(1)-N(11)-C(171) | -101.7(6)  |
| N(14)-Ru(1)-N(11)-C(171) | 179.6(5)   |
| O(11)-Ru(1)-N(11)-C(171) | -7.1(5)    |
| N(12)-Ru(1)-N(11)-C(171) | 75.4(6)    |
| N(13)-Ru(1)-N(11)-C(175) | -157.6(18) |
| N(15)-Ru(1)-N(11)-C(175) | 70.7(5)    |
| N(14)-Ru(1)-N(11)-C(175) | -8.1(5)    |
| O(11)-Ru(1)-N(11)-C(175) | 165.3(5)   |
| N(12)-Ru(1)-N(11)-C(175) | -112.2(5)  |
| N(13)-Ru(1)-N(12)-C(121) | -175.8(6)  |
| N(15)-Ru(1)-N(12)-C(121) | 137(3)     |
| N(14)-Ru(1)-N(12)-C(121) | -87.9(6)   |
| O(11)-Ru(1)-N(12)-C(121) | 96.9(6)    |
| N(11)-Ru(1)-N(12)-C(121) | 9.1(6)     |
| N(13)-Ru(1)-N(12)-C(125) | 18.6(5)    |
| N(15)-Ru(1)-N(12)-C(125) | -29(4)     |
| N(14)-Ru(1)-N(12)-C(125) | 106.5(5)   |
| O(11)-Ru(1)-N(12)-C(125) | -68.7(5)   |
| N(11)-Ru(1)-N(12)-C(125) | -156.5(5)  |
| N(15)-Ru(1)-N(13)-C(135) | 162.8(5)   |
| N(14)-Ru(1)-N(13)-C(135) | -118.1(5)  |
| O(11)-Ru(1)-N(13)-C(135) | 68.8(5)    |
| N(12)-Ru(1)-N(13)-C(135) | -14.5(5)   |
| N(11)-Ru(1)-N(13)-C(135) | 32(2)      |
| N(15)-Ru(1)-N(13)-C(131) | -14.3(7)   |
| N(14)-Ru(1)-N(13)-C(131) | 64.8(6)    |
| O(11)-Ru(1)-N(13)-C(131) | -108.3(6)  |
| N(12)-Ru(1)-N(13)-C(131) | 168.4(7)   |
| N(11)-Ru(1)-N(13)-C(131) | -145.5(18) |
| N(13)-Ru(1)-N(14)-C(141) | 75.7(6)    |
| N(15)-Ru(1)-N(14)-C(141) | 173.6(7)   |

|                          |           |
|--------------------------|-----------|
| O(11)-Ru(1)-N(14)-C(141) | 138.2(15) |
| N(12)-Ru(1)-N(14)-C(141) | -3.8(7)   |
| N(11)-Ru(1)-N(14)-C(141) | -100.8(6) |
| N(13)-Ru(1)-N(14)-C(145) | -101.2(5) |
| N(15)-Ru(1)-N(14)-C(145) | -3.3(5)   |
| O(11)-Ru(1)-N(14)-C(145) | -38.7(19) |
| N(12)-Ru(1)-N(14)-C(145) | 179.3(5)  |
| N(11)-Ru(1)-N(14)-C(145) | 82.2(5)   |
| N(13)-Ru(1)-N(15)-C(151) | -88.6(7)  |
| N(14)-Ru(1)-N(15)-C(151) | -177.5(7) |
| O(11)-Ru(1)-N(15)-C(151) | -2.1(7)   |
| N(12)-Ru(1)-N(15)-C(151) | -42(4)    |
| N(11)-Ru(1)-N(15)-C(151) | 86.3(7)   |
| N(13)-Ru(1)-N(15)-C(155) | 92.1(5)   |
| N(14)-Ru(1)-N(15)-C(155) | 3.2(5)    |
| O(11)-Ru(1)-N(15)-C(155) | 178.6(5)  |
| N(12)-Ru(1)-N(15)-C(155) | 139(3)    |
| N(11)-Ru(1)-N(15)-C(155) | -93.0(5)  |
| N(22)-Ru(2)-O(21)-C(211) | -160.4(6) |
| N(25)-Ru(2)-O(21)-C(211) | 100.0(6)  |
| N(24)-Ru(2)-O(21)-C(211) | 136.3(13) |
| N(23)-Ru(2)-O(21)-C(211) | -81.6(6)  |
| N(21)-Ru(2)-O(21)-C(211) | 15.2(6)   |
| N(22)-Ru(2)-N(21)-C(271) | 37(2)     |
| N(25)-Ru(2)-N(21)-C(271) | -102.0(6) |
| N(24)-Ru(2)-N(21)-C(271) | 180.0(6)  |
| O(21)-Ru(2)-N(21)-C(271) | -7.9(6)   |
| N(23)-Ru(2)-N(21)-C(271) | 79.5(6)   |
| N(22)-Ru(2)-N(21)-C(275) | -147(2)   |
| N(25)-Ru(2)-N(21)-C(275) | 74.0(5)   |
| N(24)-Ru(2)-N(21)-C(275) | -4.0(5)   |
| O(21)-Ru(2)-N(21)-C(275) | 168.1(5)  |
| N(23)-Ru(2)-N(21)-C(275) | -104.5(5) |
| N(25)-Ru(2)-N(22)-C(221) | 2.4(7)    |
| N(24)-Ru(2)-N(22)-C(221) | 80.8(6)   |
| O(21)-Ru(2)-N(22)-C(221) | -91.0(6)  |
| N(23)-Ru(2)-N(22)-C(221) | -179.2(7) |
| N(21)-Ru(2)-N(22)-C(221) | -136(2)   |
| N(25)-Ru(2)-N(22)-C(225) | 176.5(5)  |

|                             |           |
|-----------------------------|-----------|
| N(24)-Ru(2)-N(22)-C(225)    | -105.1(5) |
| O(21)-Ru(2)-N(22)-C(225)    | 83.1(5)   |
| N(23)-Ru(2)-N(22)-C(225)    | -5.1(5)   |
| N(21)-Ru(2)-N(22)-C(225)    | 38(2)     |
| N(22)-Ru(2)-N(23)-C(231)    | 179.6(7)  |
| N(25)-Ru(2)-N(23)-C(231)    | -132(7)   |
| N(24)-Ru(2)-N(23)-C(231)    | -92.7(7)  |
| O(21)-Ru(2)-N(23)-C(231)    | 93.0(6)   |
| N(21)-Ru(2)-N(23)-C(231)    | 3.9(7)    |
| N(22)-Ru(2)-N(23)-C(235)    | 2.4(5)    |
| N(25)-Ru(2)-N(23)-C(235)    | 51(7)     |
| N(24)-Ru(2)-N(23)-C(235)    | 90.1(5)   |
| O(21)-Ru(2)-N(23)-C(235)    | -84.2(5)  |
| N(21)-Ru(2)-N(23)-C(235)    | -173.3(5) |
| N(22)-Ru(2)-N(24)-C(245)    | -100.8(6) |
| N(25)-Ru(2)-N(24)-C(245)    | -0.8(5)   |
| O(21)-Ru(2)-N(24)-C(245)    | -37.9(17) |
| N(23)-Ru(2)-N(24)-C(245)    | -179.4(6) |
| N(21)-Ru(2)-N(24)-C(245)    | 82.9(6)   |
| N(22)-Ru(2)-N(24)-C(241)    | 73.4(7)   |
| N(25)-Ru(2)-N(24)-C(241)    | 173.5(7)  |
| O(21)-Ru(2)-N(24)-C(241)    | 136.4(12) |
| N(23)-Ru(2)-N(24)-C(241)    | -5.1(7)   |
| N(21)-Ru(2)-N(24)-C(241)    | -102.8(7) |
| N(22)-Ru(2)-N(25)-C(251)    | -96.0(7)  |
| N(24)-Ru(2)-N(25)-C(251)    | 176.3(7)  |
| O(21)-Ru(2)-N(25)-C(251)    | -9.2(7)   |
| N(23)-Ru(2)-N(25)-C(251)    | -144(6)   |
| N(21)-Ru(2)-N(25)-C(251)    | 79.8(7)   |
| N(22)-Ru(2)-N(25)-C(255)    | 91.9(5)   |
| N(24)-Ru(2)-N(25)-C(255)    | 4.2(5)    |
| O(21)-Ru(2)-N(25)-C(255)    | 178.7(5)  |
| N(23)-Ru(2)-N(25)-C(255)    | 44(7)     |
| N(21)-Ru(2)-N(25)-C(255)    | -92.3(5)  |
| Ru(1)-O(11)-C(111)-C(116)   | -30.3(10) |
| Ru(1)-O(11)-C(111)-C(112)   | 153.9(5)  |
| O(11)-C(111)-C(112)-C(113)  | 176.9(8)  |
| C(116)-C(111)-C(112)-C(113) | 0.7(11)   |
| C(111)-C(112)-C(113)-C(114) | -2.5(14)  |

|                             |           |
|-----------------------------|-----------|
| C(112)-C(113)-C(114)-C(115) | 3.1(15)   |
| C(113)-C(114)-C(115)-C(116) | -2.0(13)  |
| C(114)-C(115)-C(116)-C(111) | 0.3(12)   |
| C(114)-C(115)-C(116)-C(171) | 179.3(7)  |
| O(11)-C(111)-C(116)-C(115)  | -175.4(7) |
| C(112)-C(111)-C(116)-C(115) | 0.4(11)   |
| O(11)-C(111)-C(116)-C(171)  | 5.6(12)   |
| C(112)-C(111)-C(116)-C(171) | -178.6(7) |
| C(125)-N(12)-C(121)-C(122)  | 2.3(11)   |
| Ru(1)-N(12)-C(121)-C(122)   | -162.5(6) |
| N(12)-C(121)-C(122)-C(123)  | 0.1(11)   |
| C(121)-C(122)-C(123)-C(124) | -0.8(12)  |
| C(122)-C(123)-C(124)-C(125) | -0.8(11)  |
| C(121)-N(12)-C(125)-C(124)  | -4.0(10)  |
| Ru(1)-N(12)-C(125)-C(124)   | 163.0(5)  |
| C(121)-N(12)-C(125)-C(135)  | 173.2(6)  |
| Ru(1)-N(12)-C(125)-C(135)   | -19.8(7)  |
| C(123)-C(124)-C(125)-N(12)  | 3.2(10)   |
| C(123)-C(124)-C(125)-C(135) | -173.7(7) |
| C(135)-N(13)-C(131)-C(132)  | 0.6(12)   |
| Ru(1)-N(13)-C(131)-C(132)   | 177.6(7)  |
| N(13)-C(131)-C(132)-C(133)  | -1.0(14)  |
| C(131)-C(132)-C(133)-C(134) | 0.1(13)   |
| C(132)-C(133)-C(134)-C(135) | 1.0(12)   |
| C(131)-N(13)-C(135)-C(134)  | 0.7(10)   |
| Ru(1)-N(13)-C(135)-C(134)   | -176.8(6) |
| C(131)-N(13)-C(135)-C(125)  | -174.5(6) |
| Ru(1)-N(13)-C(135)-C(125)   | 8.0(7)    |
| C(133)-C(134)-C(135)-N(13)  | -1.5(12)  |
| C(133)-C(134)-C(135)-C(125) | 173.3(7)  |
| N(12)-C(125)-C(135)-N(13)   | 8.1(9)    |
| C(124)-C(125)-C(135)-N(13)  | -174.8(6) |
| N(12)-C(125)-C(135)-C(134)  | -167.1(7) |
| C(124)-C(125)-C(135)-C(134) | 10.0(11)  |
| C(145)-N(14)-C(141)-C(142)  | -1.2(11)  |
| Ru(1)-N(14)-C(141)-C(142)   | -178.0(5) |
| N(14)-C(141)-C(142)-C(143)  | -0.8(12)  |
| C(141)-C(142)-C(143)-C(144) | 1.6(13)   |
| C(142)-C(143)-C(144)-C(145) | -0.4(13)  |

|                             |           |
|-----------------------------|-----------|
| C(141)-N(14)-C(145)-C(144)  | 2.4(10)   |
| Ru(1)-N(14)-C(145)-C(144)   | 179.6(5)  |
| C(141)-N(14)-C(145)-C(155)  | -174.2(7) |
| Ru(1)-N(14)-C(145)-C(155)   | 3.1(8)    |
| C(143)-C(144)-C(145)-N(14)  | -1.6(12)  |
| C(143)-C(144)-C(145)-C(155) | 174.5(8)  |
| C(155)-N(15)-C(151)-C(152)  | -0.5(12)  |
| Ru(1)-N(15)-C(151)-C(152)   | -179.8(6) |
| N(15)-C(151)-C(152)-C(153)  | 0.1(14)   |
| C(151)-C(152)-C(153)-C(154) | 0.6(14)   |
| C(152)-C(153)-C(154)-C(155) | -0.8(14)  |
| C(151)-N(15)-C(155)-C(154)  | 0.3(11)   |
| Ru(1)-N(15)-C(155)-C(154)   | 179.6(6)  |
| C(151)-N(15)-C(155)-C(145)  | 178.2(7)  |
| Ru(1)-N(15)-C(155)-C(145)   | -2.4(8)   |
| C(153)-C(154)-C(155)-N(15)  | 0.3(13)   |
| C(153)-C(154)-C(155)-C(145) | -177.4(8) |
| N(14)-C(145)-C(155)-N(15)   | -0.4(10)  |
| C(144)-C(145)-C(155)-N(15)  | -176.8(6) |
| N(14)-C(145)-C(155)-C(154)  | 177.4(6)  |
| C(144)-C(145)-C(155)-C(154) | 1.1(13)   |
| C(176)-S(11)-C(160)-C(161)  | -78.4(6)  |
| S(11)-C(160)-C(161)-C(162)  | -78.0(9)  |
| S(11)-C(160)-C(161)-C(166)  | 102.1(8)  |
| C(166)-C(161)-C(162)-C(163) | -0.1(11)  |
| C(160)-C(161)-C(162)-C(163) | 180.0(7)  |
| C(161)-C(162)-C(163)-C(164) | 0.5(12)   |
| C(162)-C(163)-C(164)-C(165) | -0.8(12)  |
| C(163)-C(164)-C(165)-C(166) | 0.7(13)   |
| C(164)-C(165)-C(166)-C(161) | -0.4(12)  |
| C(162)-C(161)-C(166)-C(165) | 0.0(11)   |
| C(160)-C(161)-C(166)-C(165) | 180.0(7)  |
| C(175)-N(11)-C(171)-O(12)   | -3.8(8)   |
| Ru(1)-N(11)-C(171)-O(12)    | 169.9(5)  |
| C(175)-N(11)-C(171)-C(116)  | 174.6(7)  |
| Ru(1)-N(11)-C(171)-C(116)   | -11.7(10) |
| C(172)-O(12)-C(171)-N(11)   | -13.3(8)  |
| C(172)-O(12)-C(171)-C(116)  | 168.1(6)  |
| C(115)-C(116)-C(171)-N(11)  | -161.6(7) |



|                             |           |
|-----------------------------|-----------|
| C(111)-C(116)-C(171)-N(11)  | 17.4(11)  |
| C(115)-C(116)-C(171)-O(12)  | 16.8(10)  |
| C(111)-C(116)-C(171)-O(12)  | -164.2(7) |
| C(171)-O(12)-C(172)-C(173)  | -94.3(7)  |
| C(171)-O(12)-C(172)-C(174)  | 146.2(6)  |
| C(171)-O(12)-C(172)-C(175)  | 23.0(7)   |
| C(171)-N(11)-C(175)-C(176)  | -109.1(6) |
| Ru(1)-N(11)-C(175)-C(176)   | 77.5(7)   |
| C(171)-N(11)-C(175)-C(172)  | 17.8(7)   |
| Ru(1)-N(11)-C(175)-C(172)   | -155.7(5) |
| O(12)-C(172)-C(175)-N(11)   | -24.1(6)  |
| C(173)-C(172)-C(175)-N(11)  | 90.1(7)   |
| C(174)-C(172)-C(175)-N(11)  | -139.7(7) |
| O(12)-C(172)-C(175)-C(176)  | 95.9(7)   |
| C(173)-C(172)-C(175)-C(176) | -149.9(7) |
| C(174)-C(172)-C(175)-C(176) | -19.8(10) |
| N(11)-C(175)-C(176)-S(11)   | -164.3(4) |
| C(172)-C(175)-C(176)-S(11)  | 79.6(7)   |
| C(160)-S(11)-C(176)-C(175)  | -175.2(5) |
| Ru(2)-O(21)-C(211)-C(216)   | -10.2(10) |
| Ru(2)-O(21)-C(211)-C(212)   | 169.0(4)  |
| O(21)-C(211)-C(212)-C(213)  | -176.2(7) |
| C(216)-C(211)-C(212)-C(213) | 3.1(10)   |
| C(211)-C(212)-C(213)-C(214) | -1.8(11)  |
| C(212)-C(213)-C(214)-C(215) | -0.3(12)  |
| C(213)-C(214)-C(215)-C(216) | 1.0(12)   |
| C(214)-C(215)-C(216)-C(211) | 0.4(11)   |
| C(214)-C(215)-C(216)-C(271) | -175.9(7) |
| O(21)-C(211)-C(216)-C(215)  | 176.8(7)  |
| C(212)-C(211)-C(216)-C(215) | -2.4(10)  |
| O(21)-C(211)-C(216)-C(271)  | -6.8(11)  |
| C(212)-C(211)-C(216)-C(271) | 173.9(6)  |
| C(225)-N(22)-C(221)-C(222)  | 0.2(12)   |
| Ru(2)-N(22)-C(221)-C(222)   | 174.2(7)  |
| N(22)-C(221)-C(222)-C(223)  | -1.2(14)  |
| C(221)-C(222)-C(223)-C(224) | 2.2(14)   |
| C(222)-C(223)-C(224)-C(225) | -2.2(14)  |
| C(221)-N(22)-C(225)-C(224)  | -0.3(11)  |
| Ru(2)-N(22)-C(225)-C(224)   | -174.8(6) |

|                             |           |
|-----------------------------|-----------|
| C(221)-N(22)-C(225)-C(235)  | -178.5(7) |
| Ru(2)-N(22)-C(225)-C(235)   | 7.0(9)    |
| C(223)-C(224)-C(225)-N(22)  | 1.3(13)   |
| C(223)-C(224)-C(225)-C(235) | 179.3(8)  |
| C(235)-N(23)-C(231)-C(232)  | -0.5(12)  |
| Ru(2)-N(23)-C(231)-C(232)   | -177.6(6) |
| N(23)-C(231)-C(232)-C(233)  | -1.6(14)  |
| C(231)-C(232)-C(233)-C(234) | 0.6(14)   |
| C(232)-C(233)-C(234)-C(235) | 2.4(15)   |
| C(231)-N(23)-C(235)-C(234)  | 3.5(11)   |
| Ru(2)-N(23)-C(235)-C(234)   | -179.0(6) |
| C(231)-N(23)-C(235)-C(225)  | -176.9(7) |
| Ru(2)-N(23)-C(235)-C(225)   | 0.5(8)    |
| C(233)-C(234)-C(235)-N(23)  | -4.5(13)  |
| C(233)-C(234)-C(235)-C(225) | 176.0(8)  |
| N(22)-C(225)-C(235)-N(23)   | -4.9(10)  |
| C(224)-C(225)-C(235)-N(23)  | 177.0(7)  |
| N(22)-C(225)-C(235)-C(234)  | 174.6(8)  |
| C(224)-C(225)-C(235)-C(234) | -3.5(13)  |
| C(245)-N(24)-C(241)-C(242)  | -0.5(12)  |
| Ru(2)-N(24)-C(241)-C(242)   | -174.7(6) |
| N(24)-C(241)-C(242)-C(243)  | -0.9(13)  |
| C(241)-C(242)-C(243)-C(244) | 1.2(13)   |
| C(242)-C(243)-C(244)-C(245) | -0.1(13)  |
| C(241)-N(24)-C(245)-C(244)  | 1.5(12)   |
| Ru(2)-N(24)-C(245)-C(244)   | 176.4(6)  |
| C(241)-N(24)-C(245)-C(255)  | -177.3(7) |
| Ru(2)-N(24)-C(245)-C(255)   | -2.5(9)   |
| C(243)-C(244)-C(245)-N(24)  | -1.3(13)  |
| C(243)-C(244)-C(245)-C(255) | 177.5(8)  |
| C(255)-N(25)-C(251)-C(252)  | -1.2(12)  |
| Ru(2)-N(25)-C(251)-C(252)   | -173.1(5) |
| N(25)-C(251)-C(252)-C(253)  | 0.9(13)   |
| C(251)-C(252)-C(253)-C(254) | -1.0(13)  |
| C(252)-C(253)-C(254)-C(255) | 1.6(14)   |
| C(251)-N(25)-C(255)-C(254)  | 1.8(12)   |
| Ru(2)-N(25)-C(255)-C(254)   | 174.4(6)  |
| C(251)-N(25)-C(255)-C(245)  | -179.4(7) |
| Ru(2)-N(25)-C(255)-C(245)   | -6.8(9)   |

|                             |           |
|-----------------------------|-----------|
| C(253)-C(254)-C(255)-N(25)  | -2.0(13)  |
| C(253)-C(254)-C(255)-C(245) | 179.2(8)  |
| N(24)-C(245)-C(255)-N(25)   | 6.1(10)   |
| C(244)-C(245)-C(255)-N(25)  | -172.8(7) |
| N(24)-C(245)-C(255)-C(254)  | -175.1(7) |
| C(244)-C(245)-C(255)-C(254) | 6.0(13)   |
| C(276)-S(21)-C(260)-C(261)  | -65.4(7)  |
| S(21)-C(260)-C(261)-C(262)  | 93.0(9)   |
| S(21)-C(260)-C(261)-C(266)  | -86.8(8)  |
| C(266)-C(261)-C(262)-C(263) | -0.2(12)  |
| C(260)-C(261)-C(262)-C(263) | -180.0(7) |
| C(261)-C(262)-C(263)-C(264) | -0.1(12)  |
| C(262)-C(263)-C(264)-C(265) | 0.2(13)   |
| C(263)-C(264)-C(265)-C(266) | -0.1(14)  |
| C(262)-C(261)-C(266)-C(265) | 0.4(12)   |
| C(260)-C(261)-C(266)-C(265) | -179.9(8) |
| C(264)-C(265)-C(266)-C(261) | -0.2(14)  |
| C(275)-N(21)-C(271)-O(22)   | -0.5(8)   |
| Ru(2)-N(21)-C(271)-O(22)    | 176.1(4)  |
| C(275)-N(21)-C(271)-C(216)  | 178.6(7)  |
| Ru(2)-N(21)-C(271)-C(216)   | -4.8(10)  |
| C(272)-O(22)-C(271)-N(21)   | -14.2(8)  |
| C(272)-O(22)-C(271)-C(216)  | 166.6(5)  |
| C(215)-C(216)-C(271)-N(21)  | -168.3(7) |
| C(211)-C(216)-C(271)-N(21)  | 15.3(11)  |
| C(215)-C(216)-C(271)-O(22)  | 10.8(9)   |
| C(211)-C(216)-C(271)-O(22)  | -165.6(6) |
| C(271)-O(22)-C(272)-C(274)  | 147.2(6)  |
| C(271)-O(22)-C(272)-C(273)  | -94.6(6)  |
| C(271)-O(22)-C(272)-C(275)  | 21.5(6)   |
| C(271)-N(21)-C(275)-C(276)  | -108.4(6) |
| Ru(2)-N(21)-C(275)-C(276)   | 75.1(7)   |
| C(271)-N(21)-C(275)-C(272)  | 14.2(7)   |
| Ru(2)-N(21)-C(275)-C(272)   | -162.3(4) |
| O(22)-C(272)-C(275)-N(21)   | -21.0(6)  |
| C(274)-C(272)-C(275)-N(21)  | -137.6(6) |
| C(273)-C(272)-C(275)-N(21)  | 92.3(6)   |
| O(22)-C(272)-C(275)-C(276)  | 95.0(7)   |
| C(274)-C(272)-C(275)-C(276) | -21.6(9)  |

|                             |            |
|-----------------------------|------------|
| C(273)-C(272)-C(275)-C(276) | -151.7(6)  |
| N(21)-C(275)-C(276)-S(21)   | -158.7(4)  |
| C(272)-C(275)-C(276)-S(21)  | 88.3(6)    |
| C(260)-S(21)-C(276)-C(275)  | -171.4(5)  |
| Cl(2A)-C(1S)-Cl(1A)-Cl(1B)  | 70.0(10)   |
| Cl(2B)-C(1S)-Cl(1A)-Cl(1B)  | 85.4(11)   |
| Cl(2C)-C(1S)-Cl(1A)-Cl(1B)  | 100.6(12)  |
| Cl(2A)-C(1S)-Cl(1B)-Cl(1A)  | -112.5(9)  |
| Cl(2B)-C(1S)-Cl(1B)-Cl(1A)  | -110.9(11) |
| Cl(2C)-C(1S)-Cl(1B)-Cl(1A)  | -108.8(12) |
| Cl(1B)-C(1S)-Cl(2A)-Cl(2B)  | 176(2)     |
| Cl(2C)-C(1S)-Cl(2A)-Cl(2B)  | 1(2)       |
| Cl(1A)-C(1S)-Cl(2A)-Cl(2B)  | 139(2)     |
| Cl(1B)-C(1S)-Cl(2A)-Cl(2C)  | 175.0(12)  |
| Cl(2B)-C(1S)-Cl(2A)-Cl(2C)  | -1(2)      |
| Cl(1A)-C(1S)-Cl(2A)-Cl(2C)  | 138.2(12)  |
| C(1S)-Cl(2A)-Cl(2B)-Cl(2C)  | -5(13)     |
| Cl(2C)-Cl(2A)-Cl(2B)-C(1S)  | 5(13)      |
| Cl(1B)-C(1S)-Cl(2B)-Cl(2C)  | 174(3)     |
| Cl(2A)-C(1S)-Cl(2B)-Cl(2C)  | 178(5)     |
| Cl(1A)-C(1S)-Cl(2B)-Cl(2C)  | 132(3)     |
| Cl(1B)-C(1S)-Cl(2B)-Cl(2A)  | -4(2)      |
| Cl(2C)-C(1S)-Cl(2B)-Cl(2A)  | -178(5)    |
| Cl(1A)-C(1S)-Cl(2B)-Cl(2A)  | -46(2)     |
| C(1S)-Cl(2B)-Cl(2C)-Cl(2A)  | -5(13)     |
| Cl(2A)-Cl(2B)-Cl(2C)-C(1S)  | 5(13)      |
| C(1S)-Cl(2A)-Cl(2C)-Cl(2B)  | 175(13)    |
| Cl(2B)-Cl(2A)-Cl(2C)-C(1S)  | -175(13)   |
| Cl(1B)-C(1S)-Cl(2C)-Cl(2B)  | -7(4)      |
| Cl(2A)-C(1S)-Cl(2C)-Cl(2B)  | -1(3)      |
| Cl(1A)-C(1S)-Cl(2C)-Cl(2B)  | -56(3)     |
| Cl(1B)-C(1S)-Cl(2C)-Cl(2A)  | -6.1(15)   |
| Cl(2B)-C(1S)-Cl(2C)-Cl(2A)  | 1(3)       |
| Cl(1A)-C(1S)-Cl(2C)-Cl(2A)  | -54.8(14)  |

---

Crystals of  $\Delta$ -5 (as BPh<sub>4</sub> salt) were obtained by slow diffusion from a solution in actone layered with Et<sub>2</sub>O. Data were collected on an Oxford Xcalibur, Sapphire3, Gemini ultra detector employing graphite-monochromated Mo-K $\alpha$  radiation ( $\lambda = 0.71073 \text{ \AA}$ ) at a temperature of 100 K. The structure was solved by SHELXS-97. Refinement was done by full-matrix least squares based on F<sup>2</sup> data of one twin domain using SHELXL-97. The absolute configuration was determined. The detailed information is listed in the Tables S7-S12.

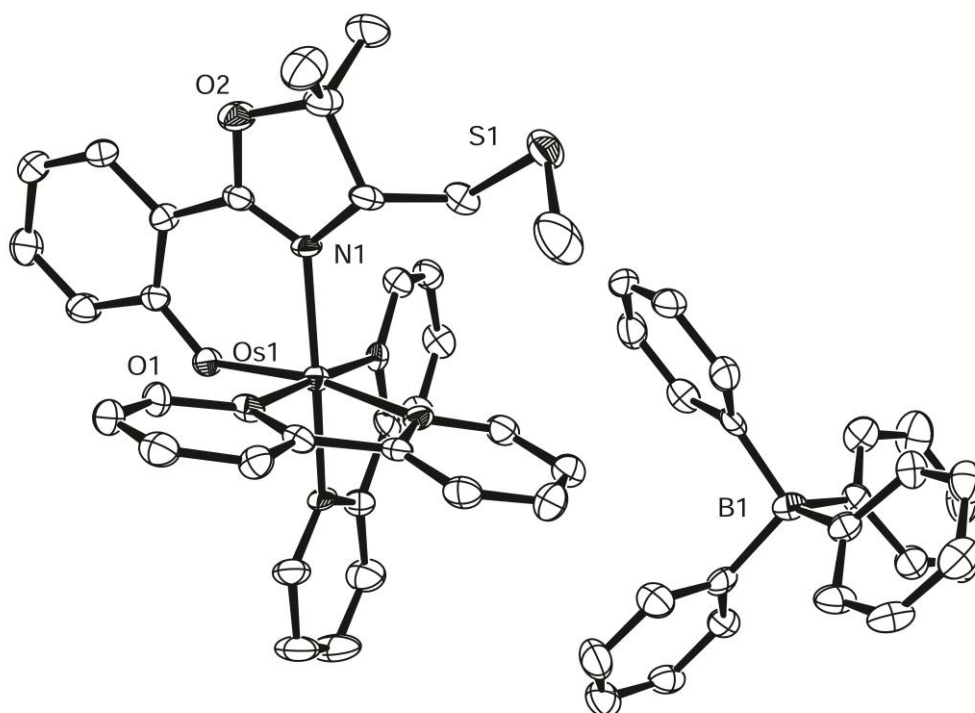

**Figure S19.** ORTEP drawing of compound  $\Delta$ -5 (BPh<sub>4</sub> counterion) with 50% probability thermal ellipsoids.

**Table S7.** Crystal data and structure refinement for  $\Delta$ -5 (BPh<sub>4</sub>).

|                                   |                                                                      |                       |
|-----------------------------------|----------------------------------------------------------------------|-----------------------|
| Identification code               | dxb                                                                  |                       |
| Empirical formula                 | C <sub>57</sub> H <sub>52</sub> B N <sub>5</sub> O <sub>2</sub> Os S |                       |
| Formula weight                    | 1072.11                                                              |                       |
| Temperature                       | 163(2) K                                                             |                       |
| Wavelength                        | 0.71073 Å                                                            |                       |
| Crystal system                    | Orthorhombic                                                         |                       |
| Space group                       | P2(1)2(1)2(1)                                                        |                       |
| Unit cell dimensions              | a = 9.4352(19) Å                                                     | $\alpha = 90^\circ$ . |
|                                   | b = 19.433(4) Å                                                      | $\beta = 90^\circ$ .  |
|                                   | c = 25.513(5) Å                                                      | $\gamma = 90^\circ$ . |
| Volume                            | 4677.9(16) Å <sup>3</sup>                                            |                       |
| Z                                 | 4                                                                    |                       |
| Density (calculated)              | 1.522 Mg/m <sup>3</sup>                                              |                       |
| Absorption coefficient            | 2.821 mm <sup>-1</sup>                                               |                       |
| F(000)                            | 2168                                                                 |                       |
| Crystal size                      | 0.28 x 0.20 x 0.18 mm <sup>3</sup>                                   |                       |
| Theta range for data collection   | 1.32 to 26.00°.                                                      |                       |
| Index ranges                      | -11 ≤ h ≤ 11, -23 ≤ k ≤ 23, -31 ≤ l ≤ 31                             |                       |
| Reflections collected             | 36663                                                                |                       |
| Independent reflections           | 9190 [R(int) = 0.0529]                                               |                       |
| Completeness to theta = 26.00°    | 99.9 %                                                               |                       |
| Absorption correction             | Empirical                                                            |                       |
| Max. and min. transmission        | 0.6307 and 0.5056                                                    |                       |
| Refinement method                 | Full-matrix least-squares on F <sup>2</sup>                          |                       |
| Data / restraints / parameters    | 9190 / 0 / 604                                                       |                       |
| Goodness-of-fit on F <sup>2</sup> | 1.001                                                                |                       |
| Final R indices [I > 2σ(I)]       | R1 = 0.0363, wR2 = 0.0777                                            |                       |
| R indices (all data)              | R1 = 0.0398, wR2 = 0.0788                                            |                       |
| Absolute structure parameter      | -0.005(7)                                                            |                       |
| Largest diff. peak and hole       | 1.698 and -0.783 e.Å <sup>-3</sup>                                   |                       |

**Table S8.** Atomic coordinates ( $\times 10^4$ ) and equivalent isotropic displacement parameters ( $\text{\AA}^2 \times 10^3$ ) for  $\Delta$ -5 (BPh<sub>4</sub>). U(eq) is defined as one third of the trace of the orthogonalized  $U^{ij}$  tensor.

|       | x        | y       | z       | U(eq) |
|-------|----------|---------|---------|-------|
| Os(1) | 1366(1)  | 5344(1) | 1073(1) | 18(1) |
| S(1)  | 5182(2)  | 4646(1) | -338(1) | 35(1) |
| O(1)  | -604(3)  | 5790(2) | 1020(2) | 23(1) |
| O(2)  | 1488(4)  | 6297(2) | -418(1) | 29(1) |
| N(1)  | 1747(4)  | 5650(2) | 297(2)  | 19(1) |
| N(2)  | 3341(5)  | 4988(2) | 1261(2) | 20(1) |
| N(3)  | 2365(5)  | 6231(2) | 1287(2) | 19(1) |
| N(4)  | 764(5)   | 5007(2) | 1802(2) | 20(1) |
| N(5)  | 318(4)   | 4453(2) | 891(2)  | 16(1) |
| C(11) | -1129(6) | 6178(3) | 652(2)  | 21(1) |
| C(12) | -2464(6) | 6476(3) | 742(2)  | 29(1) |
| C(13) | -3112(6) | 6885(3) | 387(2)  | 34(2) |
| C(14) | -2459(7) | 7035(3) | -92(2)  | 33(2) |
| C(15) | -1143(6) | 6766(3) | -189(2) | 26(1) |
| C(16) | -436(6)  | 6340(3) | 172(2)  | 21(1) |
| C(21) | 3725(7)  | 4316(3) | 1291(2) | 27(1) |
| C(22) | 5005(6)  | 4112(3) | 1496(2) | 28(1) |
| C(23) | 5950(6)  | 4602(3) | 1677(2) | 33(1) |
| C(24) | 5570(6)  | 5275(3) | 1661(2) | 27(1) |
| C(25) | 4274(6)  | 5465(3) | 1453(2) | 20(1) |
| C(31) | 1766(6)  | 6861(3) | 1281(2) | 26(1) |
| C(32) | 2514(7)  | 7444(3) | 1406(2) | 30(1) |
| C(33) | 3935(6)  | 7386(3) | 1556(2) | 29(1) |
| C(34) | 4521(6)  | 6748(3) | 1584(2) | 23(1) |
| C(35) | 3757(6)  | 6176(3) | 1440(2) | 20(1) |
| C(41) | 1059(6)  | 5328(3) | 2254(2) | 30(1) |
| C(42) | 604(8)   | 5074(3) | 2733(2) | 40(2) |
| C(43) | -143(8)  | 4479(4) | 2747(3) | 47(2) |
| C(44) | -440(7)  | 4142(3) | 2285(2) | 37(2) |
| C(45) | 18(6)    | 4414(3) | 1820(2) | 23(1) |
| C(51) | 34(6)    | 4215(3) | 405(2)  | 23(1) |
| C(52) | -780(6)  | 3656(3) | 312(2)  | 27(1) |
| C(53) | -1353(8) | 3295(3) | 726(2)  | 30(1) |

|        |          |         |         |       |
|--------|----------|---------|---------|-------|
| C(54)  | -1122(6) | 3527(3) | 1223(2) | 30(1) |
| C(55)  | -280(6)  | 4106(3) | 1304(2) | 23(1) |
| C(61)  | 953(6)   | 6072(3) | 38(2)   | 21(1) |
| C(62)  | 2823(6)  | 5932(3) | -523(2) | 28(1) |
| C(63)  | 3083(6)  | 5548(3) | 6(2)    | 23(1) |
| C(64)  | 3450(6)  | 4791(3) | -52(2)  | 26(1) |
| C(65)  | 6305(8)  | 4859(4) | 199(3)  | 55(2) |
| C(66)  | 3962(7)  | 6460(3) | -631(3) | 42(2) |
| C(67)  | 2500(8)  | 5484(3) | -992(2) | 45(2) |
| C(111) | 3907(5)  | 2054(3) | 1117(2) | 22(1) |
| C(112) | 2479(6)  | 2027(3) | 968(2)  | 30(1) |
| C(113) | 1915(7)  | 2421(3) | 573(2)  | 38(2) |
| C(114) | 2755(8)  | 2873(3) | 302(2)  | 36(2) |
| C(115) | 4163(7)  | 2931(3) | 429(2)  | 32(2) |
| C(116) | 4727(7)  | 2521(3) | 833(2)  | 29(1) |
| C(121) | 4276(6)  | 771(3)  | 1535(2) | 27(1) |
| C(122) | 3587(6)  | 466(3)  | 1119(2) | 37(1) |
| C(123) | 3402(7)  | -246(3) | 1085(3) | 50(2) |
| C(124) | 3904(8)  | -662(3) | 1479(3) | 51(2) |
| C(125) | 4610(7)  | -379(4) | 1895(3) | 44(2) |
| C(126) | 4800(6)  | 319(3)  | 1916(2) | 34(1) |
| C(131) | 3511(6)  | 1868(3) | 2127(2) | 24(1) |
| C(132) | 3514(7)  | 2559(3) | 2266(2) | 33(1) |
| C(133) | 2688(7)  | 2813(4) | 2674(3) | 42(2) |
| C(134) | 1833(7)  | 2373(4) | 2957(3) | 38(2) |
| C(135) | 1805(6)  | 1687(3) | 2823(2) | 31(1) |
| C(136) | 2630(6)  | 1442(3) | 2413(2) | 26(1) |
| C(141) | 6191(6)  | 1741(3) | 1703(2) | 27(1) |
| C(142) | 7155(6)  | 1512(3) | 1323(2) | 32(1) |
| C(143) | 8591(7)  | 1595(3) | 1370(2) | 35(1) |
| C(144) | 9175(7)  | 1905(3) | 1808(3) | 35(2) |
| C(145) | 8263(7)  | 2126(3) | 2188(2) | 34(2) |
| C(146) | 6795(6)  | 2054(3) | 2132(2) | 33(2) |
| B(1)   | 4482(7)  | 1604(4) | 1615(3) | 27(2) |

---



**Table S9.** Bond lengths [Å] and angles [°] for  $\Delta$ -5 (BPh<sub>4</sub>).

---

|              |          |
|--------------|----------|
| Os(1)-N(3)   | 2.041(4) |
| Os(1)-N(2)   | 2.045(4) |
| Os(1)-N(5)   | 2.047(4) |
| Os(1)-N(4)   | 2.051(4) |
| Os(1)-O(1)   | 2.056(3) |
| Os(1)-N(1)   | 2.098(4) |
| S(1)-C(65)   | 1.779(7) |
| S(1)-C(64)   | 1.811(6) |
| O(1)-C(11)   | 1.301(6) |
| O(2)-C(61)   | 1.341(6) |
| O(2)-C(62)   | 1.470(7) |
| N(1)-C(61)   | 1.293(6) |
| N(1)-C(63)   | 1.477(7) |
| N(2)-C(21)   | 1.359(7) |
| N(2)-C(25)   | 1.368(7) |
| N(3)-C(31)   | 1.347(7) |
| N(3)-C(35)   | 1.374(7) |
| N(4)-C(41)   | 1.342(7) |
| N(4)-C(45)   | 1.351(7) |
| N(5)-C(51)   | 1.351(7) |
| N(5)-C(55)   | 1.371(7) |
| C(11)-C(12)  | 1.406(8) |
| C(11)-C(16)  | 1.424(7) |
| C(12)-C(13)  | 1.349(8) |
| C(12)-H(12A) | 0.9500   |
| C(13)-C(14)  | 1.399(8) |
| C(13)-H(13A) | 0.9500   |
| C(14)-C(15)  | 1.370(8) |
| C(14)-H(14A) | 0.9500   |
| C(15)-C(16)  | 1.405(7) |
| C(15)-H(15A) | 0.9500   |
| C(16)-C(61)  | 1.452(7) |
| C(21)-C(22)  | 1.374(9) |
| C(21)-H(21A) | 0.9500   |
| C(22)-C(23)  | 1.383(8) |
| C(22)-H(22A) | 0.9500   |
| C(23)-C(24)  | 1.356(8) |

|              |          |
|--------------|----------|
| C(23)-H(23A) | 0.9500   |
| C(24)-C(25)  | 1.384(7) |
| C(24)-H(24A) | 0.9500   |
| C(25)-C(35)  | 1.466(7) |
| C(31)-C(32)  | 1.373(7) |
| C(31)-H(31A) | 0.9500   |
| C(32)-C(33)  | 1.399(8) |
| C(32)-H(32A) | 0.9500   |
| C(33)-C(34)  | 1.360(8) |
| C(33)-H(33A) | 0.9500   |
| C(34)-C(35)  | 1.374(7) |
| C(34)-H(34A) | 0.9500   |
| C(41)-C(42)  | 1.385(8) |
| C(41)-H(41A) | 0.9500   |
| C(42)-C(43)  | 1.355(9) |
| C(42)-H(42A) | 0.9500   |
| C(43)-C(44)  | 1.375(9) |
| C(43)-H(43A) | 0.9500   |
| C(44)-C(45)  | 1.371(8) |
| C(44)-H(44A) | 0.9500   |
| C(45)-C(55)  | 1.473(8) |
| C(51)-C(52)  | 1.351(7) |
| C(51)-H(51A) | 0.9500   |
| C(52)-C(53)  | 1.379(8) |
| C(52)-H(52A) | 0.9500   |
| C(53)-C(54)  | 1.365(8) |
| C(53)-H(53A) | 0.9500   |
| C(54)-C(55)  | 1.392(8) |
| C(54)-H(54A) | 0.9500   |
| C(62)-C(67)  | 1.511(8) |
| C(62)-C(66)  | 1.511(8) |
| C(62)-C(63)  | 1.562(7) |
| C(63)-C(64)  | 1.518(7) |
| C(63)-H(63A) | 1.0000   |
| C(64)-H(64A) | 0.9900   |
| C(64)-H(64B) | 0.9900   |
| C(65)-H(65A) | 0.9800   |
| C(65)-H(65B) | 0.9800   |
| C(65)-H(65C) | 0.9800   |

|               |           |
|---------------|-----------|
| C(66)-H(66A)  | 0.9800    |
| C(66)-H(66B)  | 0.9800    |
| C(66)-H(66C)  | 0.9800    |
| C(67)-H(67A)  | 0.9800    |
| C(67)-H(67B)  | 0.9800    |
| C(67)-H(67C)  | 0.9800    |
| C(111)-C(116) | 1.396(8)  |
| C(111)-C(112) | 1.400(8)  |
| C(111)-B(1)   | 1.635(8)  |
| C(112)-C(113) | 1.372(8)  |
| C(112)-H(11A) | 0.9500    |
| C(113)-C(114) | 1.371(9)  |
| C(113)-H(11B) | 0.9500    |
| C(114)-C(115) | 1.372(9)  |
| C(114)-H(11C) | 0.9500    |
| C(115)-C(116) | 1.406(8)  |
| C(115)-H(11D) | 0.9500    |
| C(116)-H(11E) | 0.9500    |
| C(121)-C(122) | 1.379(8)  |
| C(121)-C(126) | 1.400(8)  |
| C(121)-B(1)   | 1.643(9)  |
| C(122)-C(123) | 1.396(8)  |
| C(122)-H(12B) | 0.9500    |
| C(123)-C(124) | 1.375(10) |
| C(123)-H(12C) | 0.9500    |
| C(124)-C(125) | 1.369(10) |
| C(124)-H(12D) | 0.9500    |
| C(125)-C(126) | 1.370(9)  |
| C(125)-H(12E) | 0.9500    |
| C(126)-H(12F) | 0.9500    |
| C(131)-C(136) | 1.383(8)  |
| C(131)-C(132) | 1.390(8)  |
| C(131)-B(1)   | 1.676(9)  |
| C(132)-C(133) | 1.390(8)  |
| C(132)-H(13B) | 0.9500    |
| C(133)-C(134) | 1.379(9)  |
| C(133)-H(13C) | 0.9500    |
| C(134)-C(135) | 1.375(9)  |
| C(134)-H(13D) | 0.9500    |

|                  |            |
|------------------|------------|
| C(135)-C(136)    | 1.388(8)   |
| C(135)-H(13E)    | 0.9500     |
| C(136)-H(13F)    | 0.9500     |
| C(141)-C(146)    | 1.375(8)   |
| C(141)-C(142)    | 1.403(8)   |
| C(141)-B(1)      | 1.650(9)   |
| C(142)-C(143)    | 1.370(9)   |
| C(142)-H(14B)    | 0.9500     |
| C(143)-C(144)    | 1.384(9)   |
| C(143)-H(14C)    | 0.9500     |
| C(144)-C(145)    | 1.365(9)   |
| C(144)-H(14D)    | 0.9500     |
| C(145)-C(146)    | 1.400(8)   |
| C(145)-H(14E)    | 0.9500     |
| C(146)-H(14F)    | 0.9500     |
|                  |            |
| N(3)-Os(1)-N(2)  | 78.55(18)  |
| N(3)-Os(1)-N(5)  | 177.30(17) |
| N(2)-Os(1)-N(5)  | 101.99(17) |
| N(3)-Os(1)-N(4)  | 98.87(18)  |
| N(2)-Os(1)-N(4)  | 86.08(17)  |
| N(5)-Os(1)-N(4)  | 78.55(17)  |
| N(3)-Os(1)-O(1)  | 94.50(16)  |
| N(2)-Os(1)-O(1)  | 169.16(16) |
| N(5)-Os(1)-O(1)  | 84.57(15)  |
| N(4)-Os(1)-O(1)  | 86.81(16)  |
| N(3)-Os(1)-N(1)  | 86.20(17)  |
| N(2)-Os(1)-N(1)  | 99.28(17)  |
| N(5)-Os(1)-N(1)  | 96.30(17)  |
| N(4)-Os(1)-N(1)  | 173.30(18) |
| O(1)-Os(1)-N(1)  | 88.44(16)  |
| C(65)-S(1)-C(64) | 101.1(3)   |
| C(11)-O(1)-Os(1) | 129.5(3)   |
| C(61)-O(2)-C(62) | 108.8(4)   |
| C(61)-N(1)-C(63) | 108.8(4)   |
| C(61)-N(1)-Os(1) | 124.3(3)   |
| C(63)-N(1)-Os(1) | 125.6(3)   |
| C(21)-N(2)-C(25) | 117.3(5)   |
| C(21)-N(2)-Os(1) | 125.5(4)   |

|                    |          |
|--------------------|----------|
| C(25)-N(2)-Os(1)   | 116.2(3) |
| C(31)-N(3)-C(35)   | 118.4(4) |
| C(31)-N(3)-Os(1)   | 124.8(4) |
| C(35)-N(3)-Os(1)   | 116.8(3) |
| C(41)-N(4)-C(45)   | 118.4(5) |
| C(41)-N(4)-Os(1)   | 125.1(4) |
| C(45)-N(4)-Os(1)   | 116.5(4) |
| C(51)-N(5)-C(55)   | 117.1(4) |
| C(51)-N(5)-Os(1)   | 126.3(4) |
| C(55)-N(5)-Os(1)   | 116.2(3) |
| O(1)-C(11)-C(12)   | 117.6(5) |
| O(1)-C(11)-C(16)   | 125.1(5) |
| C(12)-C(11)-C(16)  | 117.4(5) |
| C(13)-C(12)-C(11)  | 122.7(6) |
| C(13)-C(12)-H(12A) | 118.7    |
| C(11)-C(12)-H(12A) | 118.7    |
| C(12)-C(13)-C(14)  | 120.5(6) |
| C(12)-C(13)-H(13A) | 119.7    |
| C(14)-C(13)-H(13A) | 119.7    |
| C(15)-C(14)-C(13)  | 118.6(5) |
| C(15)-C(14)-H(14A) | 120.7    |
| C(13)-C(14)-H(14A) | 120.7    |
| C(14)-C(15)-C(16)  | 122.4(5) |
| C(14)-C(15)-H(15A) | 118.8    |
| C(16)-C(15)-H(15A) | 118.8    |
| C(15)-C(16)-C(11)  | 118.4(5) |
| C(15)-C(16)-C(61)  | 119.0(5) |
| C(11)-C(16)-C(61)  | 122.5(5) |
| N(2)-C(21)-C(22)   | 122.2(6) |
| N(2)-C(21)-H(21A)  | 118.9    |
| C(22)-C(21)-H(21A) | 118.9    |
| C(21)-C(22)-C(23)  | 119.7(6) |
| C(21)-C(22)-H(22A) | 120.2    |
| C(23)-C(22)-H(22A) | 120.2    |
| C(24)-C(23)-C(22)  | 118.9(5) |
| C(24)-C(23)-H(23A) | 120.5    |
| C(22)-C(23)-H(23A) | 120.5    |
| C(23)-C(24)-C(25)  | 120.1(5) |
| C(23)-C(24)-H(24A) | 120.0    |

|                    |          |
|--------------------|----------|
| C(25)-C(24)-H(24A) | 120.0    |
| N(2)-C(25)-C(24)   | 121.7(5) |
| N(2)-C(25)-C(35)   | 114.6(5) |
| C(24)-C(25)-C(35)  | 123.6(5) |
| N(3)-C(31)-C(32)   | 122.1(5) |
| N(3)-C(31)-H(31A)  | 118.9    |
| C(32)-C(31)-H(31A) | 118.9    |
| C(31)-C(32)-C(33)  | 119.3(5) |
| C(31)-C(32)-H(32A) | 120.4    |
| C(33)-C(32)-H(32A) | 120.4    |
| C(34)-C(33)-C(32)  | 118.5(5) |
| C(34)-C(33)-H(33A) | 120.7    |
| C(32)-C(33)-H(33A) | 120.7    |
| C(33)-C(34)-C(35)  | 120.7(5) |
| C(33)-C(34)-H(34A) | 119.7    |
| C(35)-C(34)-H(34A) | 119.7    |
| C(34)-C(35)-N(3)   | 120.9(5) |
| C(34)-C(35)-C(25)  | 125.5(5) |
| N(3)-C(35)-C(25)   | 113.5(5) |
| N(4)-C(41)-C(42)   | 121.9(6) |
| N(4)-C(41)-H(41A)  | 119.0    |
| C(42)-C(41)-H(41A) | 119.0    |
| C(43)-C(42)-C(41)  | 119.2(6) |
| C(43)-C(42)-H(42A) | 120.4    |
| C(41)-C(42)-H(42A) | 120.4    |
| C(42)-C(43)-C(44)  | 119.3(6) |
| C(42)-C(43)-H(43A) | 120.3    |
| C(44)-C(43)-H(43A) | 120.3    |
| C(45)-C(44)-C(43)  | 119.6(6) |
| C(45)-C(44)-H(44A) | 120.2    |
| C(43)-C(44)-H(44A) | 120.2    |
| N(4)-C(45)-C(44)   | 121.5(5) |
| N(4)-C(45)-C(55)   | 114.6(5) |
| C(44)-C(45)-C(55)  | 123.9(5) |
| N(5)-C(51)-C(52)   | 123.3(5) |
| N(5)-C(51)-H(51A)  | 118.4    |
| C(52)-C(51)-H(51A) | 118.4    |
| C(51)-C(52)-C(53)  | 119.9(5) |
| C(51)-C(52)-H(52A) | 120.1    |

|                     |          |
|---------------------|----------|
| C(53)-C(52)-H(52A)  | 120.1    |
| C(54)-C(53)-C(52)   | 118.8(5) |
| C(54)-C(53)-H(53A)  | 120.6    |
| C(52)-C(53)-H(53A)  | 120.6    |
| C(53)-C(54)-C(55)   | 119.7(5) |
| C(53)-C(54)-H(54A)  | 120.2    |
| C(55)-C(54)-H(54A)  | 120.2    |
| N(5)-C(55)-C(54)    | 121.3(5) |
| N(5)-C(55)-C(45)    | 114.0(5) |
| C(54)-C(55)-C(45)   | 124.7(5) |
| N(1)-C(61)-O(2)     | 115.7(5) |
| N(1)-C(61)-C(16)    | 129.1(5) |
| O(2)-C(61)-C(16)    | 115.3(5) |
| O(2)-C(62)-C(67)    | 104.4(5) |
| O(2)-C(62)-C(66)    | 108.4(5) |
| C(67)-C(62)-C(66)   | 113.0(5) |
| O(2)-C(62)-C(63)    | 102.0(4) |
| C(67)-C(62)-C(63)   | 116.1(5) |
| C(66)-C(62)-C(63)   | 111.8(5) |
| N(1)-C(63)-C(64)    | 112.0(4) |
| N(1)-C(63)-C(62)    | 103.6(4) |
| C(64)-C(63)-C(62)   | 114.5(5) |
| N(1)-C(63)-H(63A)   | 108.8    |
| C(64)-C(63)-H(63A)  | 108.8    |
| C(62)-C(63)-H(63A)  | 108.8    |
| C(63)-C(64)-S(1)    | 113.3(4) |
| C(63)-C(64)-H(64A)  | 108.9    |
| S(1)-C(64)-H(64A)   | 108.9    |
| C(63)-C(64)-H(64B)  | 108.9    |
| S(1)-C(64)-H(64B)   | 108.9    |
| H(64A)-C(64)-H(64B) | 107.7    |
| S(1)-C(65)-H(65A)   | 109.5    |
| S(1)-C(65)-H(65B)   | 109.5    |
| H(65A)-C(65)-H(65B) | 109.5    |
| S(1)-C(65)-H(65C)   | 109.5    |
| H(65A)-C(65)-H(65C) | 109.5    |
| H(65B)-C(65)-H(65C) | 109.5    |
| C(62)-C(66)-H(66A)  | 109.5    |
| C(62)-C(66)-H(66B)  | 109.5    |

|                      |          |
|----------------------|----------|
| H(66A)-C(66)-H(66B)  | 109.5    |
| C(62)-C(66)-H(66C)   | 109.5    |
| H(66A)-C(66)-H(66C)  | 109.5    |
| H(66B)-C(66)-H(66C)  | 109.5    |
| C(62)-C(67)-H(67A)   | 109.5    |
| C(62)-C(67)-H(67B)   | 109.5    |
| H(67A)-C(67)-H(67B)  | 109.5    |
| C(62)-C(67)-H(67C)   | 109.5    |
| H(67A)-C(67)-H(67C)  | 109.5    |
| H(67B)-C(67)-H(67C)  | 109.5    |
| C(116)-C(111)-C(112) | 114.7(5) |
| C(116)-C(111)-B(1)   | 124.5(5) |
| C(112)-C(111)-B(1)   | 120.7(5) |
| C(113)-C(112)-C(111) | 123.4(6) |
| C(113)-C(112)-H(11A) | 118.3    |
| C(111)-C(112)-H(11A) | 118.3    |
| C(114)-C(113)-C(112) | 120.3(6) |
| C(114)-C(113)-H(11B) | 119.9    |
| C(112)-C(113)-H(11B) | 119.9    |
| C(113)-C(114)-C(115) | 119.5(6) |
| C(113)-C(114)-H(11C) | 120.2    |
| C(115)-C(114)-H(11C) | 120.2    |
| C(114)-C(115)-C(116) | 119.6(6) |
| C(114)-C(115)-H(11D) | 120.2    |
| C(116)-C(115)-H(11D) | 120.2    |
| C(111)-C(116)-C(115) | 122.6(6) |
| C(111)-C(116)-H(11E) | 118.7    |
| C(115)-C(116)-H(11E) | 118.7    |
| C(122)-C(121)-C(126) | 115.6(5) |
| C(122)-C(121)-B(1)   | 125.1(5) |
| C(126)-C(121)-B(1)   | 119.3(6) |
| C(121)-C(122)-C(123) | 122.2(6) |
| C(121)-C(122)-H(12B) | 118.9    |
| C(123)-C(122)-H(12B) | 118.9    |
| C(124)-C(123)-C(122) | 119.6(7) |
| C(124)-C(123)-H(12C) | 120.2    |
| C(122)-C(123)-H(12C) | 120.2    |
| C(125)-C(124)-C(123) | 119.9(6) |
| C(125)-C(124)-H(12D) | 120.1    |



|                      |          |
|----------------------|----------|
| C(123)-C(124)-H(12D) | 120.1    |
| C(124)-C(125)-C(126) | 119.5(6) |
| C(124)-C(125)-H(12E) | 120.3    |
| C(126)-C(125)-H(12E) | 120.3    |
| C(125)-C(126)-C(121) | 123.2(6) |
| C(125)-C(126)-H(12F) | 118.4    |
| C(121)-C(126)-H(12F) | 118.4    |
| C(136)-C(131)-C(132) | 116.4(5) |
| C(136)-C(131)-B(1)   | 123.9(5) |
| C(132)-C(131)-B(1)   | 119.6(5) |
| C(131)-C(132)-C(133) | 122.2(6) |
| C(131)-C(132)-H(13B) | 118.9    |
| C(133)-C(132)-H(13B) | 118.9    |
| C(134)-C(133)-C(132) | 120.0(6) |
| C(134)-C(133)-H(13C) | 120.0    |
| C(132)-C(133)-H(13C) | 120.0    |
| C(135)-C(134)-C(133) | 118.8(6) |
| C(135)-C(134)-H(13D) | 120.6    |
| C(133)-C(134)-H(13D) | 120.6    |
| C(134)-C(135)-C(136) | 120.6(6) |
| C(134)-C(135)-H(13E) | 119.7    |
| C(136)-C(135)-H(13E) | 119.7    |
| C(131)-C(136)-C(135) | 122.0(6) |
| C(131)-C(136)-H(13F) | 119.0    |
| C(135)-C(136)-H(13F) | 119.0    |
| C(146)-C(141)-C(142) | 115.0(6) |
| C(146)-C(141)-B(1)   | 125.8(5) |
| C(142)-C(141)-B(1)   | 119.2(5) |
| C(143)-C(142)-C(141) | 122.9(6) |
| C(143)-C(142)-H(14B) | 118.5    |
| C(141)-C(142)-H(14B) | 118.5    |
| C(142)-C(143)-C(144) | 121.1(6) |
| C(142)-C(143)-H(14C) | 119.5    |
| C(144)-C(143)-H(14C) | 119.5    |
| C(145)-C(144)-C(143) | 117.3(6) |
| C(145)-C(144)-H(14D) | 121.3    |
| C(143)-C(144)-H(14D) | 121.3    |
| C(144)-C(145)-C(146) | 121.4(6) |
| C(144)-C(145)-H(14E) | 119.3    |

|                      |          |
|----------------------|----------|
| C(146)-C(145)-H(14E) | 119.3    |
| C(141)-C(146)-C(145) | 122.3(6) |
| C(141)-C(146)-H(14F) | 118.8    |
| C(145)-C(146)-H(14F) | 118.8    |
| C(111)-B(1)-C(121)   | 113.0(5) |
| C(111)-B(1)-C(141)   | 110.1(5) |
| C(121)-B(1)-C(141)   | 107.0(5) |
| C(111)-B(1)-C(131)   | 105.1(5) |
| C(121)-B(1)-C(131)   | 109.5(5) |
| C(141)-B(1)-C(131)   | 112.2(5) |

---

**Table S10.** Anisotropic displacement parameters ( $\text{\AA}^2 \times 10^3$ ) for  $\Delta$ -5 (BPh<sub>4</sub>). The anisotropic displacement factor exponent takes the form:  $-2^2 [ h^2 a^* 2U^{11} + \dots + 2 h k a^* b^* U^{12} ]$

|       | U <sup>11</sup> | U <sup>22</sup> | U <sup>33</sup> | U <sup>23</sup> | U <sup>13</sup> | U <sup>12</sup> |
|-------|-----------------|-----------------|-----------------|-----------------|-----------------|-----------------|
| Os(1) | 20(1)           | 19(1)           | 16(1)           | 0(1)            | -1(1)           | 0(1)            |
| S(1)  | 31(1)           | 43(1)           | 32(1)           | -7(1)           | 8(1)            | 8(1)            |
| O(1)  | 16(2)           | 32(2)           | 20(2)           | 2(2)            | 2(2)            | 7(2)            |
| O(2)  | 28(2)           | 35(2)           | 23(2)           | 9(2)            | 6(2)            | 0(2)            |
| N(1)  | 22(3)           | 22(2)           | 11(2)           | 4(2)            | 3(2)            | 0(2)            |
| N(2)  | 17(3)           | 27(2)           | 14(2)           | 1(2)            | -3(2)           | 3(2)            |
| N(3)  | 21(2)           | 18(2)           | 17(2)           | -5(2)           | -3(2)           | -8(2)           |
| N(4)  | 24(2)           | 23(2)           | 13(2)           | 9(2)            | 6(2)            | 2(2)            |
| N(5)  | 13(2)           | 14(2)           | 22(2)           | -2(2)           | -4(2)           | 0(2)            |
| C(11) | 23(3)           | 25(3)           | 17(3)           | -2(2)           | -2(2)           | 3(2)            |
| C(12) | 27(3)           | 36(4)           | 23(3)           | 4(3)            | 5(3)            | 2(3)            |
| C(13) | 24(3)           | 41(4)           | 38(4)           | 0(3)            | 0(3)            | 12(3)           |
| C(14) | 36(4)           | 35(4)           | 27(3)           | 4(3)            | -6(3)           | 12(3)           |
| C(15) | 31(4)           | 26(3)           | 20(3)           | 6(2)            | 5(3)            | 1(3)            |
| C(16) | 22(3)           | 21(3)           | 19(3)           | 2(2)            | 0(2)            | 0(2)            |
| C(21) | 36(3)           | 24(3)           | 21(3)           | -3(2)           | 1(3)            | 1(3)            |
| C(22) | 31(4)           | 28(3)           | 24(3)           | 0(3)            | 4(3)            | 3(3)            |
| C(23) | 28(3)           | 40(4)           | 32(3)           | 1(3)            | -5(2)           | 11(3)           |
| C(24) | 30(3)           | 30(3)           | 22(3)           | -5(3)           | -5(2)           | -4(3)           |
| C(25) | 24(3)           | 26(3)           | 11(2)           | 0(2)            | 1(2)            | 3(2)            |
| C(31) | 36(4)           | 15(3)           | 26(3)           | 0(2)            | 3(2)            | 2(2)            |
| C(32) | 45(4)           | 19(3)           | 27(3)           | 0(3)            | 0(3)            | 4(3)            |
| C(33) | 38(4)           | 25(3)           | 24(3)           | 0(2)            | 3(3)            | -7(3)           |
| C(34) | 25(3)           | 21(3)           | 23(3)           | 2(2)            | -3(2)           | -3(2)           |
| C(35) | 24(3)           | 21(3)           | 16(2)           | -4(2)           | 2(2)            | -2(3)           |
| C(41) | 40(4)           | 32(3)           | 17(3)           | 0(3)            | -6(2)           | -1(3)           |
| C(42) | 60(5)           | 43(4)           | 15(3)           | 2(3)            | -2(3)           | -6(3)           |
| C(43) | 68(5)           | 53(5)           | 20(3)           | 11(3)           | -1(3)           | -15(4)          |
| C(44) | 52(4)           | 29(4)           | 29(3)           | 5(3)            | 3(3)            | -7(3)           |
| C(45) | 25(3)           | 26(3)           | 19(3)           | 2(2)            | 2(2)            | -1(2)           |
| C(51) | 24(3)           | 21(3)           | 24(3)           | -3(2)           | 1(2)            | -4(2)           |
| C(52) | 24(3)           | 32(3)           | 24(3)           | -7(3)           | -4(3)           | 3(3)            |
| C(53) | 29(3)           | 28(3)           | 35(3)           | -4(2)           | 5(3)            | -5(3)           |

|        |       |       |       |        |        |        |
|--------|-------|-------|-------|--------|--------|--------|
| C(54)  | 27(4) | 28(3) | 36(4) | 3(2)   | 10(3)  | -6(3)  |
| C(55)  | 20(3) | 27(3) | 23(3) | -1(2)  | 9(2)   | 4(2)   |
| C(61)  | 28(3) | 20(3) | 15(3) | -2(2)  | 2(2)   | -2(2)  |
| C(62)  | 22(3) | 41(4) | 21(3) | 4(3)   | 2(2)   | 1(3)   |
| C(63)  | 23(3) | 32(3) | 14(3) | -1(2)  | 3(2)   | 0(2)   |
| C(64)  | 24(3) | 30(3) | 23(3) | -4(2)  | 4(2)   | -4(3)  |
| C(65)  | 32(4) | 80(6) | 55(4) | -16(4) | 7(4)   | 9(4)   |
| C(66)  | 32(4) | 48(4) | 45(4) | 17(3)  | 9(3)   | 0(3)   |
| C(67)  | 55(4) | 60(5) | 20(3) | -7(3)  | -8(3)  | 13(3)  |
| C(111) | 26(3) | 23(3) | 18(3) | -9(2)  | 4(3)   | 3(2)   |
| C(112) | 29(3) | 31(3) | 31(4) | -5(3)  | 6(3)   | -2(3)  |
| C(113) | 33(4) | 44(4) | 38(4) | -12(3) | -8(3)  | 15(3)  |
| C(114) | 56(5) | 31(4) | 19(3) | -4(3)  | -9(3)  | 19(3)  |
| C(115) | 47(4) | 28(3) | 21(3) | 3(3)   | 7(3)   | 5(3)   |
| C(116) | 33(3) | 25(3) | 30(3) | -4(3)  | -1(3)  | 5(3)   |
| C(121) | 26(3) | 30(3) | 26(3) | 1(3)   | 6(3)   | 4(3)   |
| C(122) | 37(3) | 34(3) | 39(3) | 3(3)   | -4(4)  | 0(3)   |
| C(123) | 46(4) | 32(4) | 71(5) | -7(4)  | -10(4) | -3(3)  |
| C(124) | 48(5) | 23(3) | 80(6) | -1(4)  | 5(4)   | 3(3)   |
| C(125) | 47(4) | 35(4) | 49(4) | 14(4)  | 10(3)  | 12(4)  |
| C(126) | 40(3) | 30(3) | 31(3) | 5(3)   | 5(3)   | 4(3)   |
| C(131) | 16(3) | 32(3) | 23(3) | 4(2)   | -7(3)  | 1(3)   |
| C(132) | 41(4) | 28(3) | 31(3) | 2(2)   | 7(3)   | -5(3)  |
| C(133) | 43(4) | 38(4) | 44(4) | -12(3) | 0(3)   | 10(3)  |
| C(134) | 28(4) | 51(4) | 35(4) | -8(3)  | 2(3)   | 7(3)   |
| C(135) | 23(3) | 47(4) | 23(3) | 1(3)   | -2(2)  | -2(3)  |
| C(136) | 18(3) | 36(3) | 25(3) | -4(3)  | -5(2)  | -1(3)  |
| C(141) | 33(3) | 25(3) | 23(3) | 8(2)   | 2(3)   | 2(3)   |
| C(142) | 33(4) | 29(3) | 34(3) | -2(3)  | 1(3)   | 7(3)   |
| C(143) | 27(3) | 35(3) | 42(4) | 4(3)   | 8(3)   | 1(3)   |
| C(144) | 26(3) | 38(4) | 40(4) | 11(3)  | -2(3)  | -3(3)  |
| C(145) | 36(4) | 44(4) | 23(3) | 7(3)   | -7(3)  | -10(3) |
| C(146) | 34(4) | 44(4) | 20(3) | 5(3)   | 3(3)   | -4(3)  |
| B(1)   | 31(4) | 29(4) | 20(3) | 4(3)   | -1(3)  | -2(3)  |

---

**Table S11.** Hydrogen coordinates ( $\times 10^4$ ) and isotropic displacement parameters ( $\text{\AA}^2 \times 10^3$ ) for  $\Delta$ -5 (BPh<sub>4</sub>).

|        | x     | y    | z     | U(eq) |
|--------|-------|------|-------|-------|
| H(12A) | -2929 | 6387 | 1065  | 34    |
| H(13A) | -4019 | 7072 | 464   | 41    |
| H(14A) | -2918 | 7316 | -344  | 39    |
| H(15A) | -691  | 6871 | -512  | 31    |
| H(21A) | 3088  | 3975 | 1167  | 32    |
| H(22A) | 5240  | 3638 | 1513  | 33    |
| H(23A) | 6850  | 4469 | 1809  | 40    |
| H(24A) | 6195  | 5617 | 1794  | 33    |
| H(31A) | 795   | 6902 | 1188  | 31    |
| H(32A) | 2071  | 7883 | 1391  | 36    |
| H(33A) | 4479  | 7784 | 1637  | 34    |
| H(34A) | 5468  | 6696 | 1705  | 28    |
| H(41A) | 1596  | 5741 | 2246  | 36    |
| H(42A) | 813   | 5315 | 3048  | 47    |
| H(43A) | -458  | 4296 | 3072  | 57    |
| H(44A) | -960  | 3724 | 2290  | 44    |
| H(51A) | 427   | 4453 | 114   | 27    |
| H(52A) | -957  | 3513 | -38   | 32    |
| H(53A) | -1899 | 2892 | 666   | 36    |
| H(54A) | -1533 | 3294 | 1514  | 36    |
| H(63A) | 3868  | 5783 | 199   | 27    |
| H(64A) | 2726  | 4567 | -275  | 31    |
| H(64B) | 3416  | 4570 | 297   | 31    |
| H(65A) | 7297  | 4804 | 94    | 83    |
| H(65B) | 6100  | 4553 | 495   | 83    |
| H(65C) | 6135  | 5337 | 303   | 83    |
| H(66A) | 3766  | 6690 | -965  | 63    |
| H(66B) | 4886  | 6231 | -649  | 63    |
| H(66C) | 3974  | 6801 | -348  | 63    |
| H(67A) | 2355  | 5775 | -1301 | 67    |
| H(67B) | 1640  | 5216 | -924  | 67    |
| H(67C) | 3296  | 5171 | -1055 | 67    |
| H(11A) | 1869  | 1721 | 1150  | 36    |

|        |       |       |      |    |
|--------|-------|-------|------|----|
| H(11B) | 939   | 2380  | 487  | 46 |
| H(11C) | 2365  | 3145  | 28   | 43 |
| H(11D) | 4753  | 3245  | 246  | 38 |
| H(11E) | 5705  | 2564  | 916  | 35 |
| H(12B) | 3226  | 749   | 846  | 44 |
| H(12C) | 2932  | -441  | 791  | 59 |
| H(12D) | 3761  | -1146 | 1463 | 61 |
| H(12E) | 4966  | -664  | 2168 | 52 |
| H(12F) | 5311  | 507   | 2203 | 41 |
| H(13B) | 4100  | 2869  | 2076 | 40 |
| H(13C) | 2712  | 3289  | 2758 | 50 |
| H(13D) | 1274  | 2540  | 3239 | 46 |
| H(13E) | 1215  | 1379  | 3013 | 38 |
| H(13F) | 2588  | 967   | 2327 | 32 |
| H(14B) | 6796  | 1290  | 1019 | 38 |
| H(14C) | 9196  | 1437  | 1097 | 42 |
| H(14D) | 10171 | 1962  | 1843 | 42 |
| H(14E) | 8633  | 2333  | 2496 | 41 |
| H(14F) | 6194  | 2228  | 2400 | 39 |

---

**Table S12.** Torsion angles [°] for  $\Delta$ -5 (BPh<sub>4</sub>).

---

|                       |            |
|-----------------------|------------|
| N(3)-Os(1)-O(1)-C(11) | 77.2(4)    |
| N(2)-Os(1)-O(1)-C(11) | 126.9(9)   |
| N(5)-Os(1)-O(1)-C(11) | -105.3(4)  |
| N(4)-Os(1)-O(1)-C(11) | 175.9(5)   |
| N(1)-Os(1)-O(1)-C(11) | -8.8(4)    |
| N(3)-Os(1)-N(1)-C(61) | -83.5(4)   |
| N(2)-Os(1)-N(1)-C(61) | -161.2(4)  |
| N(5)-Os(1)-N(1)-C(61) | 95.5(4)    |
| N(4)-Os(1)-N(1)-C(61) | 56.0(17)   |
| O(1)-Os(1)-N(1)-C(61) | 11.2(4)    |
| N(3)-Os(1)-N(1)-C(63) | 82.5(4)    |
| N(2)-Os(1)-N(1)-C(63) | 4.7(4)     |
| N(5)-Os(1)-N(1)-C(63) | -98.6(4)   |
| N(4)-Os(1)-N(1)-C(63) | -138.1(14) |
| O(1)-Os(1)-N(1)-C(63) | 177.1(4)   |
| N(3)-Os(1)-N(2)-C(21) | 172.3(5)   |
| N(5)-Os(1)-N(2)-C(21) | -5.0(5)    |
| N(4)-Os(1)-N(2)-C(21) | 72.5(5)    |
| O(1)-Os(1)-N(2)-C(21) | 121.5(8)   |
| N(1)-Os(1)-N(2)-C(21) | -103.5(4)  |
| N(3)-Os(1)-N(2)-C(25) | 3.5(4)     |
| N(5)-Os(1)-N(2)-C(25) | -173.8(4)  |
| N(4)-Os(1)-N(2)-C(25) | -96.4(4)   |
| O(1)-Os(1)-N(2)-C(25) | -47.3(11)  |
| N(1)-Os(1)-N(2)-C(25) | 87.6(4)    |
| N(2)-Os(1)-N(3)-C(31) | 179.1(5)   |
| N(5)-Os(1)-N(3)-C(31) | -79(4)     |
| N(4)-Os(1)-N(3)-C(31) | -96.8(4)   |
| O(1)-Os(1)-N(3)-C(31) | -9.3(4)    |
| N(1)-Os(1)-N(3)-C(31) | 78.8(4)    |
| N(2)-Os(1)-N(3)-C(35) | 0.3(4)     |
| N(5)-Os(1)-N(3)-C(35) | 102(4)     |
| N(4)-Os(1)-N(3)-C(35) | 84.4(4)    |
| O(1)-Os(1)-N(3)-C(35) | 171.8(4)   |
| N(1)-Os(1)-N(3)-C(35) | -100.0(4)  |
| N(3)-Os(1)-N(4)-C(41) | -1.6(5)    |
| N(2)-Os(1)-N(4)-C(41) | 76.2(5)    |

|                         |            |
|-------------------------|------------|
| N(5)-Os(1)-N(4)-C(41)   | 179.3(5)   |
| O(1)-Os(1)-N(4)-C(41)   | -95.6(4)   |
| N(1)-Os(1)-N(4)-C(41)   | -140.5(14) |
| N(3)-Os(1)-N(4)-C(45)   | 178.6(4)   |
| N(2)-Os(1)-N(4)-C(45)   | -103.6(4)  |
| N(5)-Os(1)-N(4)-C(45)   | -0.5(4)    |
| O(1)-Os(1)-N(4)-C(45)   | 84.6(4)    |
| N(1)-Os(1)-N(4)-C(45)   | 39.7(17)   |
| N(3)-Os(1)-N(5)-C(51)   | 157(4)     |
| N(2)-Os(1)-N(5)-C(51)   | -101.6(4)  |
| N(4)-Os(1)-N(5)-C(51)   | 175.0(5)   |
| O(1)-Os(1)-N(5)-C(51)   | 87.2(4)    |
| N(1)-Os(1)-N(5)-C(51)   | -0.6(4)    |
| N(3)-Os(1)-N(5)-C(55)   | -15(4)     |
| N(2)-Os(1)-N(5)-C(55)   | 85.9(4)    |
| N(4)-Os(1)-N(5)-C(55)   | 2.5(4)     |
| O(1)-Os(1)-N(5)-C(55)   | -85.4(4)   |
| N(1)-Os(1)-N(5)-C(55)   | -173.2(4)  |
| Os(1)-O(1)-C(11)-C(12)  | -173.3(4)  |
| Os(1)-O(1)-C(11)-C(16)  | 4.6(8)     |
| O(1)-C(11)-C(12)-C(13)  | -179.8(6)  |
| C(16)-C(11)-C(12)-C(13) | 2.1(9)     |
| C(11)-C(12)-C(13)-C(14) | -0.6(10)   |
| C(12)-C(13)-C(14)-C(15) | -0.9(10)   |
| C(13)-C(14)-C(15)-C(16) | 0.8(9)     |
| C(14)-C(15)-C(16)-C(11) | 0.8(8)     |
| C(14)-C(15)-C(16)-C(61) | 179.6(5)   |
| O(1)-C(11)-C(16)-C(15)  | 179.8(5)   |
| C(12)-C(11)-C(16)-C(15) | -2.2(8)    |
| O(1)-C(11)-C(16)-C(61)  | 1.1(9)     |
| C(12)-C(11)-C(16)-C(61) | 179.1(5)   |
| C(25)-N(2)-C(21)-C(22)  | -1.1(8)    |
| Os(1)-N(2)-C(21)-C(22)  | -169.9(4)  |
| N(2)-C(21)-C(22)-C(23)  | -0.4(9)    |
| C(21)-C(22)-C(23)-C(24) | 1.9(8)     |
| C(22)-C(23)-C(24)-C(25) | -2.0(8)    |
| C(21)-N(2)-C(25)-C(24)  | 1.1(8)     |
| Os(1)-N(2)-C(25)-C(24)  | 170.9(4)   |
| C(21)-N(2)-C(25)-C(35)  | -176.2(5)  |



|                         |           |
|-------------------------|-----------|
| Os(1)-N(2)-C(25)-C(35)  | -6.4(6)   |
| C(23)-C(24)-C(25)-N(2)  | 0.4(8)    |
| C(23)-C(24)-C(25)-C(35) | 177.5(5)  |
| C(35)-N(3)-C(31)-C(32)  | 2.0(8)    |
| Os(1)-N(3)-C(31)-C(32)  | -176.8(4) |
| N(3)-C(31)-C(32)-C(33)  | -1.4(9)   |
| C(31)-C(32)-C(33)-C(34) | -1.4(8)   |
| C(32)-C(33)-C(34)-C(35) | 3.6(8)    |
| C(33)-C(34)-C(35)-N(3)  | -3.1(8)   |
| C(33)-C(34)-C(35)-C(25) | 180.0(5)  |
| C(31)-N(3)-C(35)-C(34)  | 0.2(7)    |
| Os(1)-N(3)-C(35)-C(34)  | 179.1(4)  |
| C(31)-N(3)-C(35)-C(25)  | 177.5(5)  |
| Os(1)-N(3)-C(35)-C(25)  | -3.6(6)   |
| N(2)-C(25)-C(35)-C(34)  | -176.4(5) |
| C(24)-C(25)-C(35)-C(34) | 6.3(8)    |
| N(2)-C(25)-C(35)-N(3)   | 6.4(6)    |
| C(24)-C(25)-C(35)-N(3)  | -170.8(5) |
| C(45)-N(4)-C(41)-C(42)  | -1.0(8)   |
| Os(1)-N(4)-C(41)-C(42)  | 179.3(5)  |
| N(4)-C(41)-C(42)-C(43)  | 1.0(10)   |
| C(41)-C(42)-C(43)-C(44) | -0.4(11)  |
| C(42)-C(43)-C(44)-C(45) | -0.2(11)  |
| C(41)-N(4)-C(45)-C(44)  | 0.3(8)    |
| Os(1)-N(4)-C(45)-C(44)  | -179.9(5) |
| C(41)-N(4)-C(45)-C(55)  | 178.8(5)  |
| Os(1)-N(4)-C(45)-C(55)  | -1.4(6)   |
| C(43)-C(44)-C(45)-N(4)  | 0.3(10)   |
| C(43)-C(44)-C(45)-C(55) | -178.1(6) |
| C(55)-N(5)-C(51)-C(52)  | -1.0(8)   |
| Os(1)-N(5)-C(51)-C(52)  | -173.5(4) |
| N(5)-C(51)-C(52)-C(53)  | -0.7(9)   |
| C(51)-C(52)-C(53)-C(54) | 2.3(9)    |
| C(52)-C(53)-C(54)-C(55) | -2.1(10)  |
| C(51)-N(5)-C(55)-C(54)  | 1.1(8)    |
| Os(1)-N(5)-C(55)-C(54)  | 174.4(4)  |
| C(51)-N(5)-C(55)-C(45)  | -177.1(5) |
| Os(1)-N(5)-C(55)-C(45)  | -3.9(6)   |
| C(53)-C(54)-C(55)-N(5)  | 0.4(9)    |

|                             |           |
|-----------------------------|-----------|
| C(53)-C(54)-C(55)-C(45)     | 178.5(6)  |
| N(4)-C(45)-C(55)-N(5)       | 3.4(7)    |
| C(44)-C(45)-C(55)-N(5)      | -178.1(6) |
| N(4)-C(45)-C(55)-C(54)      | -174.8(5) |
| C(44)-C(45)-C(55)-C(54)     | 3.7(9)    |
| C(63)-N(1)-C(61)-O(2)       | 1.2(6)    |
| Os(1)-N(1)-C(61)-O(2)       | 169.2(3)  |
| C(63)-N(1)-C(61)-C(16)      | -178.5(5) |
| Os(1)-N(1)-C(61)-C(16)      | -10.5(8)  |
| C(62)-O(2)-C(61)-N(1)       | 5.7(6)    |
| C(62)-O(2)-C(61)-C(16)      | -174.6(4) |
| C(15)-C(16)-C(61)-N(1)      | -176.2(5) |
| C(11)-C(16)-C(61)-N(1)      | 2.5(9)    |
| C(15)-C(16)-C(61)-O(2)      | 4.1(7)    |
| C(11)-C(16)-C(61)-O(2)      | -177.2(5) |
| C(61)-O(2)-C(62)-C(67)      | 112.0(5)  |
| C(61)-O(2)-C(62)-C(66)      | -127.4(5) |
| C(61)-O(2)-C(62)-C(63)      | -9.3(5)   |
| C(61)-N(1)-C(63)-C(64)      | -131.0(5) |
| Os(1)-N(1)-C(63)-C(64)      | 61.3(6)   |
| C(61)-N(1)-C(63)-C(62)      | -7.0(6)   |
| Os(1)-N(1)-C(63)-C(62)      | -174.8(3) |
| O(2)-C(62)-C(63)-N(1)       | 9.6(5)    |
| C(67)-C(62)-C(63)-N(1)      | -103.3(6) |
| C(66)-C(62)-C(63)-N(1)      | 125.1(5)  |
| O(2)-C(62)-C(63)-C(64)      | 131.9(5)  |
| C(67)-C(62)-C(63)-C(64)     | 19.1(7)   |
| C(66)-C(62)-C(63)-C(64)     | -112.5(6) |
| N(1)-C(63)-C(64)-S(1)       | -173.0(3) |
| C(62)-C(63)-C(64)-S(1)      | 69.3(6)   |
| C(65)-S(1)-C(64)-C(63)      | 74.4(5)   |
| C(116)-C(111)-C(112)-C(113) | 0.5(8)    |
| B(1)-C(111)-C(112)-C(113)   | 176.2(5)  |
| C(111)-C(112)-C(113)-C(114) | -0.4(9)   |
| C(112)-C(113)-C(114)-C(115) | -0.2(9)   |
| C(113)-C(114)-C(115)-C(116) | 0.5(9)    |
| C(112)-C(111)-C(116)-C(115) | -0.1(8)   |
| B(1)-C(111)-C(116)-C(115)   | -175.6(5) |
| C(114)-C(115)-C(116)-C(111) | -0.4(9)   |

|                             |           |
|-----------------------------|-----------|
| C(126)-C(121)-C(122)-C(123) | 1.1(9)    |
| B(1)-C(121)-C(122)-C(123)   | -177.5(6) |
| C(121)-C(122)-C(123)-C(124) | 0.8(10)   |
| C(122)-C(123)-C(124)-C(125) | -1.6(11)  |
| C(123)-C(124)-C(125)-C(126) | 0.5(10)   |
| C(124)-C(125)-C(126)-C(121) | 1.5(10)   |
| C(122)-C(121)-C(126)-C(125) | -2.2(9)   |
| B(1)-C(121)-C(126)-C(125)   | 176.4(6)  |
| C(136)-C(131)-C(132)-C(133) | 0.5(9)    |
| B(1)-C(131)-C(132)-C(133)   | 177.5(6)  |
| C(131)-C(132)-C(133)-C(134) | 0.3(10)   |
| C(132)-C(133)-C(134)-C(135) | -0.8(10)  |
| C(133)-C(134)-C(135)-C(136) | 0.5(9)    |
| C(132)-C(131)-C(136)-C(135) | -0.8(8)   |
| B(1)-C(131)-C(136)-C(135)   | -177.6(5) |
| C(134)-C(135)-C(136)-C(131) | 0.3(9)    |
| C(146)-C(141)-C(142)-C(143) | -0.3(8)   |
| B(1)-C(141)-C(142)-C(143)   | -178.9(5) |
| C(141)-C(142)-C(143)-C(144) | 1.0(9)    |
| C(142)-C(143)-C(144)-C(145) | -0.3(9)   |
| C(143)-C(144)-C(145)-C(146) | -1.2(9)   |
| C(142)-C(141)-C(146)-C(145) | -1.2(9)   |
| B(1)-C(141)-C(146)-C(145)   | 177.3(6)  |
| C(144)-C(145)-C(146)-C(141) | 2.0(10)   |
| C(116)-C(111)-B(1)-C(121)   | -123.7(6) |
| C(112)-C(111)-B(1)-C(121)   | 61.1(7)   |
| C(116)-C(111)-B(1)-C(141)   | -4.1(7)   |
| C(112)-C(111)-B(1)-C(141)   | -179.3(5) |
| C(116)-C(111)-B(1)-C(131)   | 116.9(6)  |
| C(112)-C(111)-B(1)-C(131)   | -58.3(6)  |
| C(122)-C(121)-B(1)-C(111)   | -5.4(9)   |
| C(126)-C(121)-B(1)-C(111)   | 176.1(5)  |
| C(122)-C(121)-B(1)-C(141)   | -126.7(6) |
| C(126)-C(121)-B(1)-C(141)   | 54.7(7)   |
| C(122)-C(121)-B(1)-C(131)   | 111.4(6)  |
| C(126)-C(121)-B(1)-C(131)   | -67.1(7)  |
| C(146)-C(141)-B(1)-C(111)   | 114.6(6)  |
| C(142)-C(141)-B(1)-C(111)   | -66.9(6)  |
| C(146)-C(141)-B(1)-C(121)   | -122.2(6) |

|                           |           |
|---------------------------|-----------|
| C(142)-C(141)-B(1)-C(121) | 56.3(6)   |
| C(146)-C(141)-B(1)-C(131) | -2.1(8)   |
| C(142)-C(141)-B(1)-C(131) | 176.4(5)  |
| C(136)-C(131)-B(1)-C(111) | 118.8(6)  |
| C(132)-C(131)-B(1)-C(111) | -57.9(7)  |
| C(136)-C(131)-B(1)-C(121) | -2.9(8)   |
| C(132)-C(131)-B(1)-C(121) | -179.5(5) |
| C(136)-C(131)-B(1)-C(141) | -121.5(6) |
| C(132)-C(131)-B(1)-C(141) | 61.8(7)   |

---

## 8. References

- [1] D. A. Freedman, J. K. Evju, M. K. Pomije, K. R. Mann, *Inorg. Chem.* **2001**, *40*, 5711-5715.
- [2] A. F. A. Peacock, A. Habtemariam, S. A. Moggach, A. Prescimone, S. Parsons, P. J. Sadler, *Inorg. Chem.* **2007**, *46*, 4049-4059.
- [3] G. Desimoni, G. Dusi, G. Faita, P. Quadrelli, P. Righetti, *Tetrahedron* **1995**, *51*, 4131-4144.
- [4] D. Franco, M. Gmez, F. Jimnez, G. Muller, M. Rocamora, M. A. Maestro, J. Maha, *Organometallics* **2004**, *23*, 3197-3209.
- [5] L. Gong, S. P. Mulcahy, D. Devarajan, K. Harms, G. Frenking, E. Meggers, *Inorg. Chem.* **2010**, *49*, 7692-7699.
- [6] L.-A. Chen, J. Ma, M. A. Celik, H.-L. Yu, Z. Cao, G. Frenking, L. Gong, E. Meggers, *Chem. Asian J.* **2012**, *7*, 2523-2526.
